# Supplementary material for: Development and appropriateness of a scoring method for International Classification of Functioning, Disabilities, and Health assessment in older patients with heart failure: a Delphi survey of expert panel in Japan
Source: PubMed Central journal article supplement — BMJ Open. 2022 Sep 17;12(9):e060609. doi: 10.1136/bmjopen-2021-060609 (PMC9486326; doi:10.1136/bmjopen-2021-060609), 2022-09-17
Supplement: bmjopen-2021-060609.draft_revisions.pdf [file bmjopen-2021-060609.draft_revisions.pdf]

# BMJ Open

BMJ Open is committed to open peer review. As part of this commitment we make the peer review history of every article we publish publicly available.

When an article is published we post the peer reviewers' comments and the authors' responses online. We also post the versions of the paper that were used during peer review. These are the versions that the peer review comments apply to.

The versions of the paper that follow are the versions that were submitted during the peer review process. They are not the versions of record or the final published versions. They should not be cited or distributed as the published version of this manuscript.

BMJ Open is an open access journal and the full, final, typeset and author-corrected version of record of the manuscript is available on our site with no access controls, subscription charges or pay-per-view fees (<http://bmjopen.bmj.com>).

If you have any questions on BMJ Open's open peer review process please email [info.bmjopen@bmj.com](mailto:info.bmjopen@bmj.com)

# BMJ Open

## Development and validation of an ICF-based comprehensive assessment for older patients with heart failure: the RAND/UCLA appropriateness method

|                               |                                                                                                                                                                                                                                                                                                                                                                                                                                                                                                                                                                                                                                                                                                                                                                                                                                                                                                                                                                                                                                                                                                                                                                                                                                                                                                                                                                                                                                                                                                                                                                                                                                                                                                                                                                                                                                                                                                                                                                                                     |
|-------------------------------|-----------------------------------------------------------------------------------------------------------------------------------------------------------------------------------------------------------------------------------------------------------------------------------------------------------------------------------------------------------------------------------------------------------------------------------------------------------------------------------------------------------------------------------------------------------------------------------------------------------------------------------------------------------------------------------------------------------------------------------------------------------------------------------------------------------------------------------------------------------------------------------------------------------------------------------------------------------------------------------------------------------------------------------------------------------------------------------------------------------------------------------------------------------------------------------------------------------------------------------------------------------------------------------------------------------------------------------------------------------------------------------------------------------------------------------------------------------------------------------------------------------------------------------------------------------------------------------------------------------------------------------------------------------------------------------------------------------------------------------------------------------------------------------------------------------------------------------------------------------------------------------------------------------------------------------------------------------------------------------------------------|
| Journal:                      | <i>BMJ Open</i>                                                                                                                                                                                                                                                                                                                                                                                                                                                                                                                                                                                                                                                                                                                                                                                                                                                                                                                                                                                                                                                                                                                                                                                                                                                                                                                                                                                                                                                                                                                                                                                                                                                                                                                                                                                                                                                                                                                                                                                     |
| Manuscript ID                 | bmjopen-2021-060609                                                                                                                                                                                                                                                                                                                                                                                                                                                                                                                                                                                                                                                                                                                                                                                                                                                                                                                                                                                                                                                                                                                                                                                                                                                                                                                                                                                                                                                                                                                                                                                                                                                                                                                                                                                                                                                                                                                                                                                 |
| Article Type:                 | Original research                                                                                                                                                                                                                                                                                                                                                                                                                                                                                                                                                                                                                                                                                                                                                                                                                                                                                                                                                                                                                                                                                                                                                                                                                                                                                                                                                                                                                                                                                                                                                                                                                                                                                                                                                                                                                                                                                                                                                                                   |
| Date Submitted by the Author: | 30-Dec-2021                                                                                                                                                                                                                                                                                                                                                                                                                                                                                                                                                                                                                                                                                                                                                                                                                                                                                                                                                                                                                                                                                                                                                                                                                                                                                                                                                                                                                                                                                                                                                                                                                                                                                                                                                                                                                                                                                                                                                                                         |
| Complete List of Authors:     | <p>Shiota, Shigehito; Hiroshima University Hospital, Heart Failure Center; Hiroshima University Hospital, Department of Rehabilitation<br/>           Kitagawa, Toshiro; Hiroshima University Hospital, Heart Failure Center; Hiroshima University Graduate School of Biomedical and Health Sciences, Department of Cardiovascular medicine<br/>           Goto, Naoya; Hiroshima University Hospital, Department of Rehabilitation<br/>           Fujisita, Hironori; Hiroshima University Hospital, Department of Rehabilitation<br/>           Tamekuni, Yurika; Hiroshima University Hospital, Department of Rehabilitation<br/>           Nakayama, Susumu; Home nursing station Sakurazaka<br/>           Mio, Naoki; Hiroshima University Hospital, Heart Failure Center; Hiroshima University Hospital, Department of Rehabilitation<br/>           Kanai, Kana; Hiroshima University Hospital, Heart Failure Center; Hiroshima University Hospital, Department of Rehabilitation<br/>           Naka, Makiko; Hiroshima University Hospital, Heart Failure Center<br/>           Yamaguchi, Mizuho; Hiroshima University Hospital, Heart Failure Center<br/>           Mochizuki, Mariko; Hiroshima Care Manager Association<br/>           Ochikubo, Hiroyuki; Hiroshima Care Manager Association<br/>           Hidaka, Takayuki; Hiroshima Prefectural Hospital, Department of Cardiovascular Medicine<br/>           Yasunobu, Yuji; Miyoshi Medical Association Hospital, Department of Cardiovascular Medicine<br/>           Nakano, Yukiko; Hiroshima University Hospital, Heart Failure Center; Hiroshima University Graduate School of Biomedical and Health Sciences, Department of Cardiovascular medicine<br/>           Kihara, Yasuki; Hiroshima University Graduate School of Biomedical and Health Sciences<br/>           Kimura, Hiroaki; Hiroshima University Hospital, Heart Failure Center; Hiroshima University Hospital, Department of Rehabilitation Medicine</p> |
| Keywords:                     | Heart failure < CARDIOLOGY, REHABILITATION MEDICINE, PUBLIC HEALTH, GERIATRIC MEDICINE                                                                                                                                                                                                                                                                                                                                                                                                                                                                                                                                                                                                                                                                                                                                                                                                                                                                                                                                                                                                                                                                                                                                                                                                                                                                                                                                                                                                                                                                                                                                                                                                                                                                                                                                                                                                                                                                                                              |
|                               |                                                                                                                                                                                                                                                                                                                                                                                                                                                                                                                                                                                                                                                                                                                                                                                                                                                                                                                                                                                                                                                                                                                                                                                                                                                                                                                                                                                                                                                                                                                                                                                                                                                                                                                                                                                                                                                                                                                                                                                                     |

1  
2  
3  
4  
5  
6  
7  
8  
9  
10  
11  
12  
13  
14  
15  
16  
17  
18  
19  
20  
21  
22  
23  
24  
25  
26  
27  
28  
29  
30  
31  
32  
33  
34  
35  
36  
37  
38  
39  
40  
41  
42  
43  
44  
45  
46  
47  
48  
49  
50  
51  
52  
53  
54  
55  
56  
57  
58  
59  
60

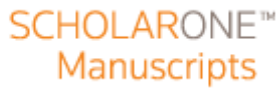

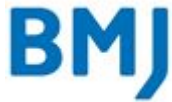

I, the Submitting Author has the right to grant and does grant on behalf of all authors of the Work (as defined in the below author licence), an exclusive licence and/or a non-exclusive licence for contributions from authors who are: i) UK Crown employees; ii) where BMJ has agreed a CC-BY licence shall apply, and/or iii) in accordance with the terms applicable for US Federal Government officers or employees acting as part of their official duties; on a worldwide, perpetual, irrevocable, royalty-free basis to BMJ Publishing Group Ltd ("BMJ") its licensees and where the relevant Journal is co-owned by BMJ to the co-owners of the Journal, to publish the Work in this journal and any other BMJ products and to exploit all rights, as set out in our [licence](#).

The Submitting Author accepts and understands that any supply made under these terms is made by BMJ to the Submitting Author unless you are acting as an employee on behalf of your employer or a postgraduate student of an affiliated institution which is paying any applicable article publishing charge ("APC") for Open Access articles. Where the Submitting Author wishes to make the Work available on an Open Access basis (and intends to pay the relevant APC), the terms of reuse of such Open Access shall be governed by a Creative Commons licence – details of these licences and which [Creative Commons](#) licence will apply to this Work are set out in our licence referred to above.

Other than as permitted in any relevant BMJ Author's Self Archiving Policies, I confirm this Work has not been accepted for publication elsewhere, is not being considered for publication elsewhere and does not duplicate material already published. I confirm all authors consent to publication of this Work and authorise the granting of this licence.

Original research

**Development and validation of an ICF-based comprehensive assessment for older patients with heart failure: the RAND/UCLA appropriateness method**

Shigehito Shiota<sup>1,2</sup>, Toshiro Kitagawa<sup>1,3</sup>, Naoya Goto<sup>2</sup>, Hironori Fujisita<sup>2</sup>, Yurika Tamekuni<sup>2</sup>, Susumu Nakayama<sup>4</sup>, Naoki Mio<sup>1,2</sup>, Kana Kanai<sup>1,2</sup>, Makiko Naka<sup>1</sup>, Mizuho Yamaguchi<sup>1</sup>, Mariko Mochizuki<sup>5</sup>, Hiroyuki Ochikubo<sup>5</sup>, Takayuki Hidaka<sup>6</sup>, Yuji Yasunobu<sup>7</sup>, Yukiko Nakano<sup>1,3</sup>, Yasuki Kihara<sup>8</sup>, Hiroaki Kimura<sup>1,9</sup>

<sup>1</sup> Heart Failure Center, Hiroshima University Hospital, Hiroshima, Japan

<sup>2</sup> Division of Clinical Support, Department of Rehabilitation, Hiroshima University Hospital, Hiroshima, Japan

<sup>3</sup> Hiroshima University Graduate School of Biomedical and Health Sciences, Hiroshima, Japan

<sup>4</sup> Home nursing station Sakurazaka, Hiroshima, Japan

<sup>5</sup> Hiroshima Care Manager Association, Hiroshima, Japan.

<sup>6</sup> Department of Cardiovascular Medicine, Hiroshima Prefectural Hospital, Hiroshima, Japan

<sup>7</sup> Department of Cardiovascular Medicine, Miyoshi Medical Association Hospital, Hiroshima, Japan

<sup>8</sup> Hiroshima University Graduate School of Biomedical and Health Sciences, Hiroshima, Japan

<sup>9</sup> Department of Rehabilitation Medicine, Hiroshima University Hospital, Hiroshima, Japan

Word count: 4932 words

1  
2  
3  
4  
5  
6 **Corresponding author:**  
7

8 Shigehito Shiota  
9

10  
11 Email: [sshiota@hiroshima-u.ac.jp](mailto:sshiota@hiroshima-u.ac.jp)  
12

13  
14 Address: 1-2-3, Kasumi, Minami-ku, Hiroshima City, Hiroshima, Japan  
15  
16  
17  
18  
19  
20  
21  
22  
23  
24  
25  
26  
27  
28  
29  
30  
31  
32  
33  
34  
35  
36  
37  
38  
39  
40  
41  
42  
43  
44  
45  
46  
47  
48  
49  
50  
51  
52  
53  
54  
55  
56  
57  
58  
59  
60

For peer review only

## ABSTRACT

**Objective:** Since the number of elderly patients with heart failure continues to increase, a common evaluation method for medical and nursing care needs to be established. This study aimed to examine the validity of a scoring method for older patients with heart failure based on the International Classification of Functioning, Disability and Health (ICF), which we developed through a Delphi study that was conducted by an expert panel.

**Design:** Cross-sectional survey. We applied the RAND/UCLA Appropriateness Method with a modified Delphi method.

**Setting and participants:** We included a panel of 26 multidisciplinary experts on heart failure care: five general practitioners, two cardiovascular physicians, 10 care managers, three nurses, pharmacist, two physical therapists, occupational therapist, nutritionist and social worker.

**Measures:** Forty-three ICF categories specific to older patients with heart failure were rated for appropriateness on a 9-point Likert scale ranging from 1 (very inappropriate) to 9 (very appropriate). The three evaluation items were as follows: (1) grading criteria, (2) evaluation methods in the supplementary grading criteria, and (3) scoring criteria based on the supplementary criteria. The median value of 7 to 9 was evaluated as "appropriate".

### Results:

A total of 21 panel members responded to all Delphi rounds. The median rating for all questions in the 43 ICF categories was "7-9: appropriate. Tertile 7-9 was more than 80% (agreement) for all 42 ICF categories except d450 walking. After modifying the scoring criteria for the supplementary assessment method for d450 walking, all questions had reached a consensus.

**Conclusion:** We developed an ICF-based scoring method for older patients with heart failure and showed that there was a consensus of "appropriate" and "agreement" by the expert panel.

**Keywords:** heart failure, older people, ICF, scoring methods, RAND/UCLA Appropriateness Method

### Strengths and limitations of this study

► An expert panel familiar with heart failure care, consisting of home physicians, care managers, and medical multidisciplinary professionals, rated the "appropriateness" of the questions in each ICF category through a multiple-round process to achieve a consensus.

► The assessment domains studied the 43-item ICF relevant to older adults with heart

1  
2  
3  
4  
5  
6 failure, covering not only the medical assessment but also the physical and mental  
7 functioning, activity and social participation, and environmental factors.

8 ►The expert panel comprised general practitioners, cardiologists, and paramedical  
9 professions (rehabilitation, nursing care, and welfare), but caution is needed in  
10 generalizing the findings because of the study's limited geographical area.  
11  
12  
13  
14  
15  
16  
17  
18  
19  
20  
21  
22  
23  
24  
25  
26  
27  
28  
29  
30  
31  
32  
33  
34  
35  
36  
37  
38  
39  
40  
41  
42  
43  
44  
45  
46  
47  
48  
49  
50  
51  
52  
53  
54  
55  
56  
57  
58  
59  
60

For peer review only



## INTRODUCTION

In Japan, cardiovascular disease is the second leading cause of death. [1] In addition, cardiovascular disease accounts for 20.6% of all the cases requiring nursing care, and the annual medical costs exceed 6 trillion yen. [2,3] The Japanese government has approved the Japanese National Plan for Promotion of Measures Against Cerebrovascular and Cardiovascular Disease in 2020. This Japanese National Plan promotes the establishment of a comprehensive community care system that encompasses health, medical care, welfare, nursing care, and the sharing of evidence-based information. [4,5]

Among cardiovascular diseases, heart failure (HF) is increasing with the ageing of the population, with the number of patients in Japan expected to exceed 1.3 million by 2030. [6,7] Heart failure reduces the quality of life of patients and their families by repeated rehospitalizations due to exacerbations, and the increased burden of medical expenses. [8-10] The one-year readmission rate for heart failure patients is 35% in Japan, but a study of elderly heart failure patients in the United States reported a rate of 64%. [11,12] Elderly heart failure patients have multiple comorbidities, such as atrial fibrillation, chronic renal failure, dementia, and depression, which are factors associated with readmission. [13] In addition, many factors have been reported to be associated with readmission in heart failure patients, including cognitive function, depression/anxiety, exercise tolerance, muscle strength, walking speed, activities of daily living (ADL), and instrumental activities of daily living (IADL). [14-18] The Guideline on Diagnosis and Treatment of Acute and Chronic Heart Failure (JCS 2017/ JHFS 2017) recommends that patients with limited self-care capabilities, such as elderly patients with heart failure, should receive education and support from their families and actively utilise social resources such as home physicians and home-visit nursing. [19] Social support and information sharing in the community have been reported to prevent HF readmissions, and there is an urgent need to establish an information sharing system between medical professionals and care professionals in the community. [20,21]

The Japanese Society of Heart Failure recommends the use of the International Classification of Functioning, Disability and Health (ICF) for comprehensive assessment and multidisciplinary information sharing in elderly patients with heart failure. [22] The ICF was introduced by the WHO in 2001; it aims to provide a framework for health and health-related conditions. The ICF is expected to be used as a common language for patients, their families, medical professionals, and caregivers. [23] However, ICF has not been widely used in clinical practice. [24] Thus, we selected 43 ICF categories according to previous studies for a comprehensive assessment of older patients with heart failure.

1  
2  
3  
4  
5  
6 [25,26] The 43 ICF categories specific to older patients with heart failure consisted of 17  
7 body functions and one body structure, 19 activities and participation in the same, and 6  
8 environmental factors. However, in order to utilise a comprehensive assessment based  
9 on the ICF in clinical practice, it is necessary to develop guidelines for the assessment  
10 of the 43 ICF categories and to verify their appropriateness.  
11  
12

13 The purpose of this study was to develop a scoring method of older patients with heart  
14 failure based on the ICF, and to determine its appropriateness using the Delphi technique.  
15  
16

## 17 **METHOD**

### 18 **Patient and public involvement**

19 Patients and the public are not involved in the design, planning, conduct or reporting of  
20 this study.  
21  
22  
23

### 24 **Design**

25 We applied the Delphi method to an expert panel. The Delphi method is a consensus  
26 method used in the development of guidelines and clinical indicators, and is effective in  
27 guiding assessments and treatments for which there is limited evidence. The Delphi  
28 method is also a standard practice in the development of ICF Core Sets. [27] We  
29 developed a questionnaire based on the literature review and structured a two-stage  
30 survey with an expert panel, referring to the RAND/UCLA appropriateness methodology.  
31 [28] (Figure 1).  
32  
33  
34  
35  
36  
37

### 38 **Establishing of the expert panel**

39 The expert panel consisted of multidisciplinary professionals working in primary care,  
40 elderly care, home and community health care, and paramedical services. All members  
41 of the expert panel are experts in the assessment, treatment, and care of older patients  
42 with heart failure. To coordinate the panel, we used the networks of the Hiroshima  
43 Prefecture Association of Care Managers and the Hiroshima Heart Health Promotion  
44 Project. [29] The panel consisted of 26 members: five general practitioners, two  
45 cardiovascular physicians, 10 care managers, three nurses, one pharmacist, two  
46 physical therapists, one occupational therapist, one nutritionist, and one social worker.  
47  
48  
49  
50  
51  
52

### 53 **Development of the Delphi questionnaire**

54 We developed scoring guidelines and linking of the assessment batteries to the 43 ICF  
55 categories selected from previous studies by medical professionals and care  
56 professionals. [25,26] To develop the questionnaire, we first conducted a literature  
57  
58  
59  
60

1  
2  
3  
4  
5  
6 review of the ICF linking rules. The ICF linking rules are a systematic methodology for  
7 linking the existing assessment batteries to the ICF codes. [30,31] All articles related to  
8 the ICF linking rule from January 2005 to August 2020 were included in the study. We  
9 used MEDLINE (PubMed), Cochrane Library, CINAHL, and PsycInfo as electronic  
10 article databases. The search terms in the electronic article database were "ICF" and  
11 "Linking rule" or "Rasch" in medical subject headings (MeSH). The search criteria were  
12 as follows: (1) written in English, (2) cross-sectional study, cohort study, or case-control  
13 study, (3) target group of people aged 18 years or older, (4) use of an existing evaluation  
14 battery, (5) results from ICF data or Rasch analysis of the ICF data, and (6) "ICF" and  
15 "linking rule" present in the title. The literature review was carried out by five authors (SS,  
16 NG, HF, SN, and YT) in two phases. In the first phase, the appropriateness of the titles  
17 and abstracts were assessed based on the search criteria. In the second phase, the full  
18 text was assessed. Finally, we carried out a qualitative analysis of articles to identify links  
19 to assessment batteries and scoring systems associated with the 43 ICF categories. We  
20 completed the questionnaire based on the results of this literature review and the  
21 explanatory notes in the ICF Reference Guide. [32,33] The Delphi questionnaire  
22 consisted of the following three questions regarding the appropriateness of the 43 ICF  
23 categories as follow; (i) the grade guidelines, (ii) the evaluation battery linked to the ICF  
24 categories, and (iii) the scoring guidelines for the evaluation battery linked to the ICF  
25 categories. All questionnaires were developed using a Google Form, with a description  
26 of each ICF category and the rationale for scoring.  
27  
28  
29  
30  
31  
32  
33  
34  
35  
36  
37  
38

### 39 **Delphi process and funding consensus**

40 The Delphi process for reaching a consensus is shown in Figure 1. Before conducting  
41 the Delphi survey, the Heart Failure Center (HFC) held an online meeting for the panel  
42 members. In the online meeting, we explained the purpose of our study and the methods  
43 of the Delphi process to the panel members and obtained their consent to participate in  
44 the study. In the Delphi study, the panel members assessed the appropriateness of the  
45 following questionnaire items: (1) guidelines for scoring the 43 ICF categories for elderly  
46 patients with heart failure, (2) a rating battery linked to the ICF categories, and (3)  
47 guidelines for scoring the linked rating battery. To assess the appropriateness, we used  
48 a nine-point Likert scale ranging from 1 (very inappropriate) to 9 (very appropriate). Panel  
49 members were also asked to freely describe the items that they thought needed revision.  
50  
51

52 In the first round, the HFC mailed a sheet with instructions on how to conduct the ICF  
53 category adequacy assessment, as well as the URL and QR codes for the questionnaire.  
54 The panel members rated the "appropriateness" of the questions in each ICF category  
55  
56  
57  
58  
59  
60

1  
2  
3  
4  
5  
6 on a scale of 1 to 9. The HFC had the panel members tabulate their responses and they  
7 modified the questionnaire based on the panel's comments. In the second round, the  
8 HFC emailed the revised questionnaire and feedback based on the panel members'  
9 responses. As in the first round, the panel members rated the appropriateness of all the  
10 ICF category questions and wrote freely about items that they thought needed to be  
11 modified. The HFC compiled the panel members' responses and assessed their  
12 appropriateness. We also modified the questionnaire based on the panel's comments.  
13 The revised questionnaire was emailed to the panel members, and a final consensus  
14 was reached after confirming that there were no comments for revision.  
15  
16  
17  
18  
19

## 20 **Analysis**

21 Guided by the RAND/UCLA appropriateness methodology.[28], we used the median  
22 of the responses from the panellists to assess appropriateness. Appropriateness was  
23 evaluated on the following three levels: "Appropriate", a median panel value of 7-9 with  
24 no disagreement; "Uncertain", a median panel value of 4-6, or any median value with  
25 which there is no disagreement; "Inappropriate", a median panel value of 1-3, with no  
26 disagreement. The definition of agreement consent is defined as follows: "Agreement",  
27 80% or more of the respondents' medians are within the same region (1-3, 4-6, 7-9) as  
28 the median.  
29  
30  
31  
32  
33  
34  
35

## 36 **Ethics**

37 This study was conducted in accordance with the principles of the Declaration of  
38 Helsinki. We explained the purpose and content of the study in writing and at online  
39 meetings to the expert panel members who participated in the study and obtained their  
40 written consent. The received data was processed after deleting personal information  
41 (names). Approval was obtained from the Ethical Review Committee for Epidemiological  
42 Research, Hiroshima University (Approval No: E-2580). This study was supported by the  
43 MHLW Comprehensive Research on Statistical Information Program, Grant Number  
44 JPMH20AB1002.  
45  
46  
47  
48  
49

## 50 **RESULTS**

### 51 **Characteristics of the expert panel participants**

52 A total of 26 experts agreed to participate in the study. In the first round, 24 of the 26  
53 invited experts responded to the questionnaire. In the second Delphi round, 21 experts  
54 responded to the questionnaires. Table 1 shows the characteristics of the experts who  
55 responded to all Delphi rounds.  
56  
57  
58  
59  
60

Table 1 Characteristics of the expert panel participants (n = 21)

| Characteristics                            | n (%)     |
|--------------------------------------------|-----------|
| Sex                                        |           |
| Male                                       | 8 (38.1)  |
| Female                                     | 13 (61.9) |
| Professions                                |           |
| Home physicians                            | 4 (19.0)  |
| Cardiovascular physicians                  | 1 (4.8)   |
| Care managers                              | 9 (42.8)  |
| Nurses                                     | 3 (14.3)  |
| Pharmacist                                 | 1 (4.8)   |
| Physical therapists                        | 2 (9.5)   |
| Occupational therapist                     | 1 (4.8)   |
| Type of facilities                         |           |
| Hospital: Acute care ward                  | 6 (28.6)  |
| Hospital: Rehabilitation ward              | 2 (9.5)   |
| Clinic                                     | 4 (19.0)  |
| Regional comprehensive support centre      | 2 (9.5)   |
| Community care centre/Home nursing station | 6 (28.6)  |
| Municipal office                           | 1 (4.8)   |

### Development of the Delphi questionnaire of ICF assessment method for older patients with heart failure

A total of 409 references were extracted from the literature survey. The breakdown of each article database was as follows: MEDLINE (PubMed), 230 articles; Cochrane Library, 0 articles; CINAHL, 107 articles; PsycInfo, 72 articles. In the primary screening, 107 references were extracted, and in the secondary screening, 26 references were extracted. Finally, two references were excluded, and the total number of eligible references was 26. In the qualitative analysis, we excluded articles dealing with assessment batteries such as stroke, musculoskeletal diseases, hand surgery, and low back pain, whose relevance to older heart failure patients was not clear. As a result, eight articles addressed assessment batteries linked to the 43 ICF categories in older patients with heart failure. [34-41] (Figure 2). More than half of the assessment batteries used in the eight references were ADL assessments such as Functional Independence Measure (FIM) and Barthel Index (BI), and general quality of life assessments such as Short Form

1  
2  
3  
4  
5  
6  
36 and Euro QoL-5D.

7  
8  
9  
10  
11  
12  
13  
14  
15  
16  
17  
18  
19  
20  
21  
22  
23  
24  
Based on the literature review, the evaluation battery corresponding to the ICF categories was selected, and the grade guidelines were determined. We have explained the scoring guideline clearly and briefly, based on the ICF Reference Guide. [32,33] We referred to the Italian ICF guidelines. [42] for ICF categories not covered in the literature review. In addition, we adopted a widely used clinical assessment battery and developed our own grading guidelines. Finally, we decided to provide 30 of the 43 ICF categories with a rating battery to assist in scoring, while the remaining 13 ICF categories were scored using only the scoring guidelines (Table 2).

### 25 26 27 28 29 30 31 32 33 34 35 36 37 38 39 40 **Delphi round 1**

41  
42  
43  
44  
45  
46  
47  
48  
49  
50  
51  
52  
53  
54  
55  
56  
57  
58  
59  
60  
From February to March of 2021, 24 panel members (92.3%) responded to Round 1 of the Delphi process. Panel members assessed the appropriateness of the following three items for the 43 ICF categories: (1) the scoring guidelines, (2) the assessment battery of supplementary criteria, and (3) scoring guidelines for the assessment battery of supplementary criteria. As a result, we found that all 43 ICF categories had a median of 7-9, but for 26 ICF categories the tertile 7-9% was less than 80% and was not considered a consensus. We revised the descriptions and scoring criteria for the 26 ICF categories for which we could not reach a consensus, and based on panel members' opinions we developed a questionnaire for Round 2.

### 41 42 43 44 45 46 47 48 49 50 51 52 53 54 55 56 57 58 59 60 **Delphi round 2**

From April to May of 2021, we emailed the revised questionnaire to the 24 panel members who responded to Round 1. 21 panel members (87.5%) responded to the Round 2 questionnaire. There was less score variability in Round 2 than in Round 1, with a median of 7-9 in all 43 ICF categories (Table 2). We found the tertile 7-9% to be above 80% in all ICF categories except for the guideline for the supplementary criterion of category d450 walking. Based on the respondents' feedback, we modified the supplementary criteria for ICF category d450 walking to exclude 5 meters walking speed and to score only FIM. After modifying the ICF category d450, we sent the manual of the modified assessment method by e-mail to all panel members who participated in Round 2, asking for their comments, and confirming that we had reached a consensus.

Table 2: Results of the 43 ICF categories in the second Delphi round.

| ICF categories                                                      | Evaluation battery as supplementary criterion                  | Scoring guidelines |                 | Evaluation battery adopted for the supplementary ICF categories |                 | Guidelines for scoring the supplementary criteria |                 |
|---------------------------------------------------------------------|----------------------------------------------------------------|--------------------|-----------------|-----------------------------------------------------------------|-----------------|---------------------------------------------------|-----------------|
|                                                                     |                                                                | median             | Tertile 7-9 (%) | median                                                          | Tertile 7-9 (%) | median                                            | Tertile 7-9 (%) |
| Consciousness function                                              | Japan Coma Scale                                               | 8                  | 85.7            | 9                                                               | 90.5            | 9                                                 | 95.2            |
| Orientation function                                                | Mimi-Mental State Examination                                  | 8                  | 85.7            | 8                                                               | 81.0            | 9                                                 | 90.5            |
| Energy and drive function                                           | Vitality Index                                                 | 8                  | 90.5            | 8, 9                                                            | 85.7            | 8, 9                                              | 90.5            |
| Sleep function                                                      | Pittsburgh Sleep Quality Index                                 | 8                  | 90.5            | 9                                                               | 90.5            | 9                                                 | 81.0            |
| Higher-level cognitive functions                                    | Frontal Assessment Battery                                     | 7                  | 90.5            | 8                                                               | 90.5            | 9                                                 | 85.7            |
| Heart function                                                      | Echocardiography; left ventricular function, Electrocardiogram | 7, 8               | 81.0            | 9                                                               | 85.7            | 8, 9                                              | 85.7            |
| Blood vessel function                                               | Fontaine classification                                        | 7, 8               | 81.0            | 7, 9                                                            | 90.5            | 9                                                 | 81.0            |
| Blood pressure function                                             | Blood pressure                                                 | 7, 8               | 81.0            | 9                                                               | 95.2            | 9                                                 | 90.5            |
| Respiration function                                                | SpO <sub>2</sub> , Respiration Rate                            | 8                  | 90.5            | 8                                                               | 85.7            | 8                                                 | 95.2            |
| Exercise tolerance function                                         | Specific Activity Scale                                        | 9                  | 90.2            | 9                                                               | 85.7            | 9                                                 | 95.2            |
| Sensations associated with cardiovascular and respiratory functions | NYHA classification                                            | 9                  | 90.5            | 9                                                               | 95.2            | 9                                                 | 95.2            |
| Defaecation function                                                | -                                                              | 8                  | 85.7            | -                                                               | -               | -                                                 | -               |
| Weight maintenance functions                                        | Body Mass Index                                                | 8                  | 85.7            | 9                                                               | 85.7            | 9                                                 | 85.7            |
| Water, mineral and electrolyte balance functions                    | Blood test: Na, K                                              | 7, 9               | 81.0            | 7, 9                                                            | 85.7            | 7                                                 | 85.7            |
| Urination function                                                  | -                                                              | 8                  | 81.0            | -                                                               | -               | -                                                 | -               |
| Mobility of joint function                                          | Range Of Motion                                                | 8                  | 85.7            | 8                                                               | 85.7            | 7, 8                                              | 90.5            |
| Muscle power function                                               | Manual Muscle Test or five-times sit-to-stand                  | 8                  | 85.7            | 7                                                               | 85.7            | 8                                                 | 81.0            |
| Structure of the cardiovascular system                              | Echocardiography; Severity of valve function                   | 7                  | 85.7            | 7                                                               | 85.7            | 7                                                 | 90.5            |

1  
2  
3  
4  
5  
6  
7  
8  
9  
10  
11  
12  
13  
14  
15  
16  
17  
18  
19  
20  
21  
22  
23  
24  
25  
26  
27  
28  
29  
30  
31  
32  
33  
34  
35  
36  
37  
38  
39  
40  
41  
42  
43  
44  
45  
46  
47  
48  
49  
50  
51  
52  
53  
54  
55  
56  
57  
58  
59  
60

|               |                                                        |                                                                 |         |      |      |      |      |      |
|---------------|--------------------------------------------------------|-----------------------------------------------------------------|---------|------|------|------|------|------|
|               |                                                        | Chest radiograph; CTR                                           |         |      |      |      |      |      |
| d177          | Making decisions                                       | -                                                               | 8       | 85.7 | -    | -    | -    | -    |
| d230          | Carrying out daily routine                             | -                                                               | 8       | 90.5 | -    | -    | -    | -    |
| d310          | Communicating with-receiving-spoken messages           | FIM; Comprehension                                              | 8       | 90.5 | 9    | 95.2 | 9    | 95.2 |
| d330          | Speaking                                               | FIM; Expression                                                 | 8       | 90.5 | 9    | 95.2 | 9    | 90.5 |
| d420          | Transferring oneself                                   | FIM; Transfers                                                  | 8       | 95.2 | 8    | 95.2 | 8    | 95.2 |
| d450          | Walking                                                | FIM; Walk<br>5-m walk test                                      | 8       | 95.2 | 8    | 90.2 | 8    | 76.2 |
| d510          | Washing oneself                                        | FIM; Bathing                                                    | 7       | 95.2 | 8, 9 | 95.2 | 7    | 95.2 |
| d520          | Caring for body parts                                  | FIM; Grooming                                                   | 8       | 95.2 | 7, 9 | 90.2 | 7, 9 | 95.2 |
| d530          | Toileting                                              | FIM; Toileting                                                  | 7       | 90.2 | 9    | 90.2 | 7    | 85.7 |
| d540          | Dressing                                               | FIM; Dressing                                                   | 7       | 95.2 | 8    | 95.2 | 7    | 95.2 |
| d550/<br>d560 | Eating/ Drinking                                       | FIM; Eating                                                     | 8       | 95.2 | 8    | 90.5 | 9    | 85.7 |
| d570          | Looking after one's health                             | -                                                               | 8       | 85.7 | -    | -    | -    | -    |
| d620          | Acquisition of goods and services                      | Instrumental Activities of Daily Living scale; Shopping         | 8       | 81.0 | 8    | 85.7 | 8    | 85.7 |
| d630          | Preparing meals                                        | Instrumental Activities of Daily Living scale; Food preparation | 8       | 90.5 | 8    | 95.2 | 8    | 85.7 |
| d640          | Doing housework                                        | Instrumental Activities of Daily Living scale; Housekeeping     | 8       | 81.0 | 8    | 85.7 | 8    | 85.7 |
| d710          | Basic interpersonal interactions                       | -                                                               | 7, 8, 9 | 85.7 | -    | -    | -    | -    |
| d760          | Family relationships                                   | -                                                               | 7, 8, 9 | 85.7 | -    | -    | -    | -    |
| d920          | Recreation and leisure                                 | -                                                               | 7       | 90.5 | -    | -    | -    | -    |
| d310          | Immediate family                                       | -                                                               | 8       | 85.7 | -    | -    | -    | -    |
| d340          | Personal care providers and personal assistants        | -                                                               | 9       | 90.5 | -    | -    | -    | -    |
| d355          | Health professionals                                   | -                                                               | 8       | 95.2 | -    | -    | -    | -    |
| d410          | Individual attitudes of immediate family members       | -                                                               | 8       | 90.5 | -    | -    | -    | -    |
| d575          | General social support services, systems, and policies | -                                                               | 8       | 90.5 | -    | -    | -    | -    |
| d580          | Health services, systems, and policies                 | -                                                               | 7       | 85.7 | -    | -    | -    | -    |



1  
2  
3  
4  
5  
6  
7 SpO<sub>2</sub>, oxygen saturation; NYHA, New York Heart Association; CTR, cardiothoracic ratio;  
8 FIM, Functional Independence Measure.  
9

## 10 11 12 13 **DISCUSSION**

14 We have developed a comprehensive assessment of older people with heart failure for  
15 widespread use in clinical practice and validated the scoring method using the RAND  
16 Delphi method. The results of the two-round Delphi process were judged to be  
17 "appropriate" in all 43 ICF categories of questions and "agreement" in all 43 ICF  
18 categories, except for the scoring guidelines for supplementary criteria for d450 walking.  
19 In the d450 walking, we had to reach a consensus through the modifications based on  
20 the panel members' comments.  
21  
22  
23  
24

25 The purpose of this study was to develop an assessment method that could be used  
26 not only by cardiologists but also by medical professionals: general practitioners, care  
27 managers and paramedical professions. Therefore, we adopted a simple evaluation  
28 method that requires as little special machinery and environment as possible. For  
29 example, although exercise tolerance at b455 has been reported to be a prognostic  
30 factor for heart failure.[43], we avoided cardiopulmonary exercise testing (CPX). [44-46]  
31 and the 6-minute walk test. [47] and chose specific activity scale (SAS) instead. [48] In  
32 the d450 walking, we used two assessment batteries, gait speed and FIM, as  
33 supplementary criteria, but the agreement rate did not exceed 80% in the second Delphi  
34 study. Although gait speed is a prognostic factor for heart failure patients over 65 years  
35 of age.[16], we adopted FIM only as an auxiliary criterion for simplicity of assessment,  
36 and obtained a consensus from the panel members. However, the 43 items in the current  
37 ICF did not include renal function, BNP, and anaemia, which are prognostic factors for  
38 heart failure. [49] We suggest that these items be added, although the increase in the  
39 items may prevent their wide-spread use in the clinical setting, making their clinical use  
40 more difficult. In addition, the 43 ICF categories assessment instrument developed in this  
41 study did not include personal factors such as age, sex, values, lifestyle, coping, and  
42 personality. In the care of chronic diseases, patient-centred intervention is the  
43 principle.[50], and patient-centred care is also recommended in the ESC guidelines. [51]  
44 We propose that personal factors need to be included when developing an ICF  
45 information-sharing system.  
46  
47  
48  
49  
50  
51  
52  
53  
54  
55

56 In Japan, the establishment of a comprehensive community care system that integrates  
57 medical care, welfare, and nursing care is being promoted, but evidence for information  
58  
59  
60

1  
2  
3  
4  
5  
6 sharing is lacking. We expect that the ICF-based assessment method for older patients  
7 with heart failure developed in this study will be widely used in clinical practice.  
8  
9

### 10 **Strengths and limitations**

11 Since the purpose of this study was to develop a common community-based evaluation  
12 method for medical and nursing care, we constructed an expert panel related to medical  
13 professions and nursing care professions in Hiroshima prefecture. Since there is no  
14 variation in the regions of the panel members, the existence of selective bias cannot be  
15 denied. Therefore, we suggest that the results of this study should be used with caution  
16 in regions other than Hiroshima prefecture. This study was based on the RAND/UCLS  
17 Delphi method, but face-to-face meetings could not be conducted because of the current  
18 coronavirus pandemic. Therefore, the implementation is not strictly based on the  
19 RAND/UCLS method. We believe that we should have held an online meeting during the  
20 Delphi Round 2. In this study, the Delphi method through expert consensus was used to  
21 clarify the appropriateness of the evaluation method. The shortcomings of the Delphi  
22 method are the possibility of coercion and inducement to gather opinions and the issue  
23 of the validity of the questionnaire. In the future, it will be necessary to clarify the validity  
24 of the evaluation method in survey studies of elderly people with heart failure.  
25  
26  
27  
28  
29  
30  
31  
32  
33

### 34 **Implications and Future directions**

35 The results of this study have two implications. First, it is the establishment of a  
36 comprehensive assessment method for older patients with heart failure, which is a social  
37 problem in Japan. Comprehensive multidisciplinary assessment is important to prevent  
38 rehospitalization for heart failure, and the ICF-based scoring method developed in this  
39 study is expected to prevent rehospitalization. Second, the ICF-based evaluation method  
40 allows for an international comparison of the effectiveness of heart failure treatment and  
41 information sharing. Wagner proposes a patient-centred model for chronic disease care  
42 that utilises local social resources and information sharing systems such as information  
43 and communication technology (ICT). [52,53] In the future, it is necessary to establish  
44 an information sharing system using a comprehensive assessment method based on the  
45 ICF, and to examine the effect of readmission prevention and differences in life function  
46 according to local policies.  
47  
48  
49  
50  
51  
52  
53  
54  
55

### 56 **CONCLUSION**

57 We developed a scoring method based on the ICF for elderly heart failure patients and  
58  
59  
60

clarified its appropriateness using the Delphi method. Future work is required to develop an ICF-based information sharing system and to clarify its impact on the prevention of re-hospitalisation and quality of life in older patients with heart failure

### **Acknowledgements**

For their contribution to the development of the ICF-based comprehensive assessment for older patients with heart failure, the team would like to acknowledge Dr. Etsushi Akimoto, Dr. Satoshi Ishida, Dr. Futoshi Konishi, Dr. Hideki Nojima, MS Keiko Ishii, MS Kaoru Okazaki, MS Mayumi Ono, MS Eiko Kishikawa, MS Emi Ochibe, MS Shizue Kobayasi, MS Kaori Tikashita, MS Yasue Saitou, MR Hiroshi Sakurashita, MR Nobuyoshi Satou, MS Misuzu Sakai, MR Takayuki Santa, MS Hiromi Shigeoka, MS Yoko Nakasa, MR Tomoaki Honma, MS Kazue Mitinori, MS Midori Motohiro and MS Norie Yoshimoto. This study was conducted as a part of the Hiroshima Heart Health Promotion Project. We would like to thank Editage ([www.editage.com](http://www.editage.com)) for English language editing.

### **Contributions**

All authors meet the criteria for authorship of the ICMJE. SS, TK, TH and HK contributed to the conceptualisation of the study. SS, NG, HF, SN, YT, NM, KK, MN and MY were responsible for designing the questionnaire and collecting and analysing the data. MN, MY, MM, HO and YY were responsible for recruiting the study participants. YN, YK and HK were responsible for interpreting the results and managing the project. SS and HK supervised all research activities. All authors reviewed the current draft and approved the final current submission.

### **Funding**

This work was supported by the MHLW Comprehensive Research on Statistical Information Program, Grant Number JPMH20AB1002.

### **Competing interests**

The authors declare that there are no conflicts of interest regarding the publication of this paper.

### **Ethics approval**

The study was approved by the Hiroshima University of Epidemiological Research Ethics Review Board (approval number: E-2217).

## Provenance and peer review

Not commissioned; externally peer reviewed.

## Data availability statement

Data are available upon reasonable request.

## Open access

This is an open access article distributed in accordance with the Creative Commons Attribution Non-Commercial (CC BY-NC 4.0) licence, which permits others to distribute, remix, adapt, build upon this work non-commercially, and licence their derivative works on different terms, provided the original work is properly cited, appropriate credit is given, any changes made indicated, and the use is non-commercial. See <http://creativecommons.org/licenses/by-nc/4.0/>).

## ORCID iD

Shigehito Shota <https://orcid.org/0000-0001-7186-2327>

## References

- 1 Ministry of Health Labour and Welfare. Vital statistics of JAPAN. <https://www.mhlw.go.jp/toukei/saikin/hw/jinkou/houkoku18/dl/all.pdf> (Accessed 19 Oct 2021) 2018 [in Japanese].
- 2 Ministry of Health Labour and Welfare. *Comprehensive survey of living Conditions 2019*. [in Japanese]. <https://www.mhlw.go.jp/toukei/saikin/hw/k-tyosa/k-tyosa19/dl/14.pdf>. Accessed 19 October 2021.
- 3 Ministry of Health Labour and Welfare. Estimates of national medical care Expenditure 2017. [in Japanese]. <https://www.mhlw.go.jp/toukei/saikin/hw/k-iryohi/17/dl/data.pdf> (Accessed 19 Oct 2021).
- 4 Ministry of Health Labour and Welfare, Japan. *The Japanese national plan for promotion of measures against cerebrovascular and cardiovascular disease* [in Japanese] published 2020.
- 5 Kuwabara M, Mori M, Komoto S. Japanese national plan for promotion of measures against cerebrovascular and cardiovascular disease. *Circulation* 2021;**143**:1929–31. doi: [10.1161/CIRCULATIONAHA.120.052737](https://doi.org/10.1161/CIRCULATIONAHA.120.052737). (Epub 17 May 2021).
- 6 Okura Y, Ramadan MM, Ohno Y, et al. Impending epidemic: future projection of heart failure in Japan to the year 2055. *Circ J* 2008;**72**:489–91. <https://doi.org/10.1253/circj.72.489>.

- 1  
2  
3  
4  
5  
6  
7 Yasuda S, Miyamoto Y, Ogawa H. Current status of cardiovascular medicine  
8 in the aging society of Japan. *Circulation* 2018;**138**:965–7.  
9 <https://doi.org/10.1161/CIRCULATIONAHA.118.035858>.
- 10  
11  
12  
13  
14  
15  
16  
17  
18  
19  
20  
21  
22  
23  
24  
25  
26  
27  
28  
29  
30  
31  
32  
33  
34  
35  
36  
37  
38  
39  
40  
41  
42  
43  
44  
45  
46  
47  
48  
49  
50  
51  
52  
53  
54  
55  
56  
57  
58  
59  
60
- 8 Nieminen MS, Dickstein K, Fonseca C, et al. The patient perspective: quality of  
life in advanced heart failure with frequent hospitalisations. *Int J Cardiol* 2015;**191**:256–  
64. doi: [10.1016/j.ijcard.2015.04.235](https://doi.org/10.1016/j.ijcard.2015.04.235).
- 9 Lewis EF, Claggett BL, McMurray JJV et al. Health-related quality of life  
outcomes in PARADIGM-HF. *Circ Heart Fail* 2017;**10**:e003430. doi:  
[10.1161/CIRCHEARTFAILURE.116.003430](https://doi.org/10.1161/CIRCHEARTFAILURE.116.003430).
- 10 Lee H, Oh SH, Cho H et al. Prevalence and socio-economic burden of heart  
failure in an aging society of South Korea. *BMC Cardiovasc Disord* 2016;**16**:215. doi:  
[10.1186/s12872-016-0404-2](https://doi.org/10.1186/s12872-016-0404-2).
- 11 Tsuchihashi M, Tsutsui H, Kodama K et al. Medical and socioenvironmental  
predictors of hospital readmission in patients with congestive heart failure. *Am Heart J*  
2001;**142**:E7.
- 12 Hernandez AF, Hammill BG, O'Connor CM et al. Clinical effectiveness of beta-  
blockers in heart failure: findings from the OPTIMIZE-HF (Organized Program to Initiate  
Lifesaving Treatment in Hospitalized Patients with Heart Failure) Registry. *J Am Coll*  
*Cardiol* 2009;**53**:184–92.
- 13 Benjamin EJ, Muntner P, Alonso A et al. UpdateHeart Disease and Stroke  
Statistics-2019 Update: A Report from the American Heart Association. *Circulation*  
2019;**139**:e56–e528.
- 14 Huynh QL, Negishi K, Blizzard L, et al. “Mild cognitive impairment predicts death  
and readmission within 30 days of discharge for heart failure.” *Int J Cardiol*  
2016;**221**:212–7.
- 15 O'Connor CM, Hasselblad V, Mehta RH, et al. “Triage after hospitalization with  
advanced heart failure: the ESCAPE (Evaluation Study of Congestive Heart Failure and  
Pulmonary Artery Catheterization Effectiveness) risk model and discharge score.” *J Am*  
*Coll Cardiol* 2010, Mar 2;**55**:872–8.
- 16 Lo AX, Donnelly JP, McGwin G Jr, et al. “Impact of gait speed and instrumental  
activities of daily living on all-cause mortality in adults ≥65 years with heart failure.” *Am*  
*J Cardiol* Mar 15 2015;**115**:797–801.
- 17 Takabayashi K, Kitaguchi S, Iwatsu K, et al. “A decline in activities of daily living  
due to acute heart failure is an independent risk factor of hospitalization for heart failure  
and mortality.” *J Cardiol* 2019;**73**:522–9.
- 18 Löfvenmark C, Mattiasson AC, Billing E et al. “Perceived loneliness and social

1  
2  
3  
4  
5  
6 support in patients with chronic heart failure.” *Eur J Cardiovasc Nurs* 2009;**8**:251–8.

7 19 Tsutsui H, Ide T, Ito H; et al. JCS/JHFS 2021 guideline focused update on  
8 diagnosis and treatment of acute and chronic heart failure. *Circ J* 2021.  
9 doi:[10.1253/circj.CJ-21-0431](https://doi.org/10.1253/circj.CJ-21-0431).

10  
11 20 Sokoreli I, Cleland JG, Pauws SC, et al. Added value of frailty and social support  
12 in predicting risk of 30-day unplanned re-admission or death for patients with heart  
13 failure: an analysis from OPERA-HF. *Int J Cardiol* 2019;**278**:167–72.  
14 <https://doi.org/10.1016/j.ijcard.2018.12.030>.

15  
16 21 Bradley EH, Curry L, Horwitz LI, et al. Hospital strategies associated with 30-  
17 day readmission rates for patients with heart failure. *Circ Cardiovasc Qual Outcomes*  
18 2013;**6**:444–50.

19 22 Japan Heart Failure Society Guidelines Committee. Statement on the  
20 treatment of elderly heart failure patients.  
21 [http://www.asas.or.jp/jhfs/pdf/Statement\\_HeartFailurel.pdf](http://www.asas.or.jp/jhfs/pdf/Statement_HeartFailurel.pdf) (Accessed 19 Nov 2021)  
22 2016.

23 23 World Health Organization. *ICF International classification of functioning,*  
24 *disability and health*. Geneva: WHO. 2001.

25 24 Maribo T, Petersen KS, Handberg C, et al. Systematic literature review on ICF  
26 from 2001 to 2013 in the Nordic countries focusing on clinical and rehabilitation context.  
27 *J Clin Med Res* 2016;**8**:1–9.

28 25 Shiota S, Naka M, Kitagawa T, et al. Selection of comprehensive assessment  
29 categories based on the international classification of functioning, disability, and health  
30 for elderly patients with heart failure: A Delphi survey among registered instructors of  
31 cardiac rehabilitation. *Occup Ther Int* 2021 Jun 25;**2021**:6666203. doi:  
32 [10.1155/2021/6666203](https://doi.org/10.1155/2021/6666203). eCollection 2021.

33 26 Shiota S, Kitagawa T, Hidaka T, et al. The international classification of  
34 functioning, disabilities, and health categories necessary for care planning for older  
35 patients with heart failure: A survey of care managers in Japan. *BMC Geriatr*. 2021 Dec  
36 15;**21**(1):704. doi: [10.1186/s12877-021-02647-3](https://doi.org/10.1186/s12877-021-02647-3). 27 Selb M, Escorpizo R, Kostanjsek N  
37 et al. A guide on how to develop an International Classification of Functioning, Disability  
38 and Health Core Set. *Eur J Phys Rehabil Med* 2015;**51**:105–17. PMID: [24686893](https://pubmed.ncbi.nlm.nih.gov/24686893/).

39 28 Fitch K, Bernstein SJ, Aguilar MD, et al. *The Rand/UCLA appropriateness*  
40 *method user's manual*. Santa Monica: RAND 2001.

41 29 Toshiro K, Takayuki H, Makiko N, et al. Current medical and social issues for  
42 hospitalized heart failure patients in Japan and factors for improving their outcomes -  
43 insights from the REAL-HF registry. *Circ Rep*. 2020 Mar;**14**:226–34. doi:  
44  
45  
46  
47  
48  
49  
50  
51  
52  
53  
54  
55  
56  
57  
58  
59  
60

1  
2  
3  
4  
5  
6 [10.1253/circrep.CR-20-0011](https://doi.org/10.1253/circrep.CR-20-0011).

7 30 Cieza A, Geyh S, Chatterji S, et al. ICF linking rules: an update based on lessons  
8 learned. *J Rehabil Med* 2005 Jul;**37**:212–8. doi: [10.1080/16501970510040263](https://doi.org/10.1080/16501970510040263).

9  
10 31 Cieza A, Fayed N, Bickenbach J, et al. Refinements of the ICF Linking Rules to  
11 strengthen their potential for establishing comparability of health information. *Disabil*  
12 *Rehabil* 2019 Mar;**41**:574–83. doi: [10.3109/09638288.2016.1145258](https://doi.org/10.3109/09638288.2016.1145258). (Epub 17 Mar  
13 2016).

14  
15 32 Mukaino M, Prodinger B, Yamada S, et al. Supporting the clinical use of the ICF  
16 in Japan - development of the Japanese version of the simple, intuitive descriptions for  
17 the ICF Generic-30 set, its operationalization through a rating reference guide, and  
18 interrater reliability study. *BMC Health Serv Res* 2020 Jan 30;**20**:66. doi:  
19 [10.1186/s12913-020-4911-6](https://doi.org/10.1186/s12913-020-4911-6).

20  
21 33 Senju Y, Mukaino M, Prodinger B, et al. Development of a clinical tool for rating  
22 the body function categories of the ICF generic-30/rehabilitation set in Japanese  
23 rehabilitation practice and examination of its interrater reliability. *BMC Med Res Methodol*  
24 2021 Jun 14;**21**:121. doi: [10.1186/s12874-021-01302-0](https://doi.org/10.1186/s12874-021-01302-0).

25  
26 34 Prodinger B, O'Connor RJ, Stucki G et al. Establishing score equivalence of the  
27 Functional Independence Measure motor scale and the Barthel index, utilising the  
28 International Classification of Functioning, Disability and Health and Rasch  
29 measurement theory. *J Rehabil Med* 2017 May 16;**49**:416–22. doi: [10.2340/16501977-  
30 2225](https://doi.org/10.2340/16501977-2225).

31  
32 35 Bladh S, Nilsson MH, Carlsson G et al. Content analysis of 4 fear of falling  
33 rating scales by linking to the international classification of functioning, disability and  
34 health. *PM&R* 2013 Jul;**5**:573–582.e1. doi: [10.1016/j.pmrj.2013.01.006](https://doi.org/10.1016/j.pmrj.2013.01.006).

35  
36 36 Milman N, Annelies Boonen, Peter A Merkel. et al. Mapping of the outcome  
37 measures in rheumatology core set for antineutrophil cytoplasmic antibody-associated  
38 vasculitis to the International Classification of Function, Disability and Health. *Arthritis*  
39 *Care Res (Hoboken)*. 2015 Feb;**67**:255–63. doi: [10.1002/acr.22414](https://doi.org/10.1002/acr.22414). PMID: 25048363.

40  
41 37 Hoang-Kim A, Schemitsch E, Abhaya V. *Methodological challenges in the use*  
42 *of hip-specific composite outcomes: linking measurements from hip fracture trials to the*.  
43 International Classification of Functioning, Disability and Health Framework. *Arch Orthop*  
44 *Trauma Surg* 2014;**134**:219–28. DOI [10.1007/s00402-013-1824-4](https://doi.org/10.1007/s00402-013-1824-4)

45  
46 38 Cieza A, Stucki G. Content comparison of health-related quality of life (HRQOL)  
47 instruments based on the international classification of functioning, disability and health  
48 (ICF). *Qual Life Res* 2005 Jun;**14**:1225–37. doi: [10.1007/s11136-004-4773-0](https://doi.org/10.1007/s11136-004-4773-0).

49  
50 39 Nilsson MH, Westergren A, Carlsson G. et al. Uncovering indicators of the  
51  
52  
53  
54  
55  
56  
57  
58  
59  
60

1  
2  
3  
4  
5  
6 international classification of functioning, disability, and health from the 39-item  
7 Parkinson's disease questionnaire. *Parkinsons Dis* 2010 Jul 12;**2010**:984673. doi:  
8 [10.4061/2010/984673](https://doi.org/10.4061/2010/984673).  
9

10 40 Darzins SW, Imms C, Di Stefano M. Measurement of activity limitations and  
11 participation restrictions: examination of ICF-linked content and scale properties of the  
12 FIM and PC-PART instruments. *Disabil Rehabil* 2017 May;**39**:1025–38. doi:  
13 [10.3109/09638288.2016.1172670](https://doi.org/10.3109/09638288.2016.1172670). (Epub 20 May 2016).  
14

15 41 Prodinge B, Stucki G, Coenen M. et al. The measurement of functioning using  
16 the International Classification of Functioning, Disability and Health: comparing qualifier  
17 ratings with existing health status instruments. *Disabil Rehabil* 2019 Mar;**41**:541–8. doi:  
18 [10.1080/09638288.2017.1381186](https://doi.org/10.1080/09638288.2017.1381186). (Epub 8 Oct 2017).  
19

20 22 42 Giardini A, Vitacca M, Pedretti R. et al. Linking the ICF codes to clinical real-  
21 life assessments: the challenge of the transition from theory to practice. *G Ital Med Lav*  
22 *Ergon* 2019 May;**41**:78–104. PMID: [31170337](https://pubmed.ncbi.nlm.nih.gov/31170337/) [in Italian].  
23

24 25 43 JCS/JACR. Guideline on rehabilitation in patients with cardiovascular disease.  
26 [https://www.j-circ.or.jp/cms/wp-content/uploads/2021/03/JCS2021\\_Makita.pdf](https://www.j-circ.or.jp/cms/wp-content/uploads/2021/03/JCS2021_Makita.pdf)  
27 (Accessed 19 Nov 2021) 2021.  
28

29 30 44 Mancini DM, Eisen H, Kusmaul W, et al. Value of peak exercise oxygen  
31 consumption for optimal timing of cardiac transplantation in ambulatory patients with  
32 heart failure. *Circulation* 1991;**83**:778–86.  
33

34 35 45 Keteyian SJ, Patel M, Kraus WE, et al. Variables measured during  
36 cardiopulmonary exercise testing as predictors of mortality in chronic systolic heart  
37 failure. *J Am Coll Cardiol* 2016;**67**:780–9. PMID: [26892413](https://pubmed.ncbi.nlm.nih.gov/26892413/).  
38

39 40 46 Nakanishi M, Takaki H, Kumasaka R, et al. Targeting of high peak respiratory  
41 exchange ratio is safe and enhances the prognostic power of peak oxygen uptake for  
42 heart failure patients. *Circ J* 2014 Aug 25;**78**:2268–75. doi: [10.1253/circj.cj-14-0047](https://doi.org/10.1253/circj.cj-14-0047),  
43 PMID: [25056425](https://pubmed.ncbi.nlm.nih.gov/25056425/).  
44

45 46 47 ATS Committee on Proficiency Standards for Clinical Pulmonary Function  
47 Laboratories. ATS statement: guidelines for the six-minute walk test. *Am J Respir Crit*  
48 *Care Med* 2002;**166**:111–7. PMID: [12091180](https://pubmed.ncbi.nlm.nih.gov/12091180/).  
49

50 51 48 Goldman L, Hashimoto B, Cook EF, et al. Comparative reproducibility and  
52 validity of systems for assessing cardiovascular functional class: advantages of a new  
53 specific activity scale. *Circulation* 1981;**64**:1227–34. PMID: [7296795](https://pubmed.ncbi.nlm.nih.gov/7296795/).  
54

55 56 49 Guidelines for diagnosis and treatment of acute and chronic heart failure  
57 (JCS 2017/JHFS 2017) . [https://www.mhlw.go.jp/file/05-Shingikai-10901000-](https://www.mhlw.go.jp/file/05-Shingikai-10901000-Kenkoukyoku-Soumuka/0000202651.pdf)  
58 [Kenkoukyoku-Soumuka/0000202651.pdf](https://www.mhlw.go.jp/file/05-Shingikai-10901000-Kenkoukyoku-Soumuka/0000202651.pdf) (Accessed 19 Nov 2021) 2018.  
59  
60



- 1  
2  
3  
4  
5  
6 50 Wagner EH, Bennett SM, Austin BT et al. Finding common ground: patient-  
7 centeredness and evidence-based chronic illness care. *J Altern Complement Med*  
8 2005;**11**;Supplement 1:S7–SS15. doi: [10.1089/acm.2005.11.s-7](https://doi.org/10.1089/acm.2005.11.s-7).  
9  
10 51 McDonagh TA, Metra M, Adamo M et al. 2021 ESC Guidelines for the  
11 diagnosis and treatment of acute and chronic heart failure. *Eur Heart J* 2021;**42**:3599–  
12 726. doi: [10.1093/eurheartj/ehab368](https://doi.org/10.1093/eurheartj/ehab368).  
13  
14 52 Wagner EH. More than a case manager. *Ann Intern Med* 1998;**129**:654–6.  
15  
16 53 Wagner EH, Austin BT, Davis C et al. Improving chronic illness care:  
17 translating evidence into action. *Health Aff (Millwood)* 2001;**20**:64–78.  
18  
19  
20  
21  
22  
23  
24  
25  
26  
27  
28  
29  
30  
31  
32  
33  
34  
35  
36  
37  
38  
39  
40  
41  
42  
43  
44  
45  
46  
47  
48  
49  
50  
51  
52  
53  
54  
55  
56  
57  
58  
59  
60

1  
2  
3  
4  
5  
6 **Figure Legends**  
7

8 Fig. 1: Development of Questionnaire and Delphi process flow  
9

10  
11  
12  
13 Fig. 2: Selection of records and process flow diagrams  
14  
15  
16  
17  
18  
19  
20  
21  
22  
23  
24  
25  
26  
27  
28  
29  
30  
31  
32  
33  
34  
35  
36  
37  
38  
39  
40  
41  
42  
43  
44  
45  
46  
47  
48  
49  
50  
51  
52  
53  
54  
55  
56  
57  
58  
59  
60

For peer review only

**Development of the questionnaire**

**Selection of ICF categories for comprehensive assessment in medical and care of older patients with heart failure: Our previous research**  
 · The Delphi survey among registered instructors of cardiac rehabilitation [●]  
 · The survey of necessary for care planning for care managers in Japan [●]

**Literature review: ICF linking rules**  
 Evaluation battery linked to ICF categories needed for comprehensive assessment of older people with heart failure

**Development of the questionnaire: Validity of a comprehensive ICF-based assessment of older patients with heart failure**  
 1) Relevance of explanatory text to scoring guidelines  
 2) Validity of the evaluation battery linked to each ICF categories  
 3) The appropriateness of the scoring guidelines for the evaluation battery linked to each ICF categories

**Delphi approach**

Heart Failure Center

Expert Panel (n=26)

Round 0

**Online meeting**  
 · Explanation of the purpose and methods of the study.  
 · Obtaining consent to participate in research.

Round 1

**First round of surveys**  
 · Documentation of the research and an gratuities have been sent.  
 · We sent a reminder email a week before the response deadline.

**Responses to the questionnaire**  
 · All questions were answered on a scale of 1-9.  
 · Answered to the web questionnaire.

**Calculation of results/ Modification of the questionnaire**  
 · We revise the questionnaire of items for "Disagree" or "Not appropriate" based on comments of expert panel.

Round 2

**Second round of surveys**  
 · We mailed the revised questionnaire and feedback on the answers to the panel members.  
 · We sent a reminder email a week before the response deadline.

**Responses to the questionnaire**  
 · All questions were answered on a scale of 1-9.  
 · Answered to the web questionnaire.

**Calculation of results/ Modification of the questionnaire**  
 · We revise the questionnaire of items for "Disagree" or "Not appropriate" based on comments of expert panel.

**Repeat the round if necessary**

**Reaching consensus**  
 · Development of comprehensive assessment methods based on ICF for medical and care of older patients with heart failure

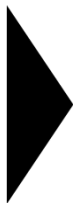

1  
2  
3  
4  
5  
6  
7  
8  
9  
10  
11  
12  
13  
14  
15  
16  
17  
18  
19  
20  
21  
22  
23  
24  
25  
26  
27  
28  
29  
30  
31  
32  
33  
34  
35  
36  
37  
38  
39  
40  
41  
42  
43  
44  
45  
46  
47  
48  
49  
50  
51  
52  
53  
54  
55  
56  
57  
58  
59  
60

Identification  
Screening  
Eligibility  
Quality appraisal  
Included

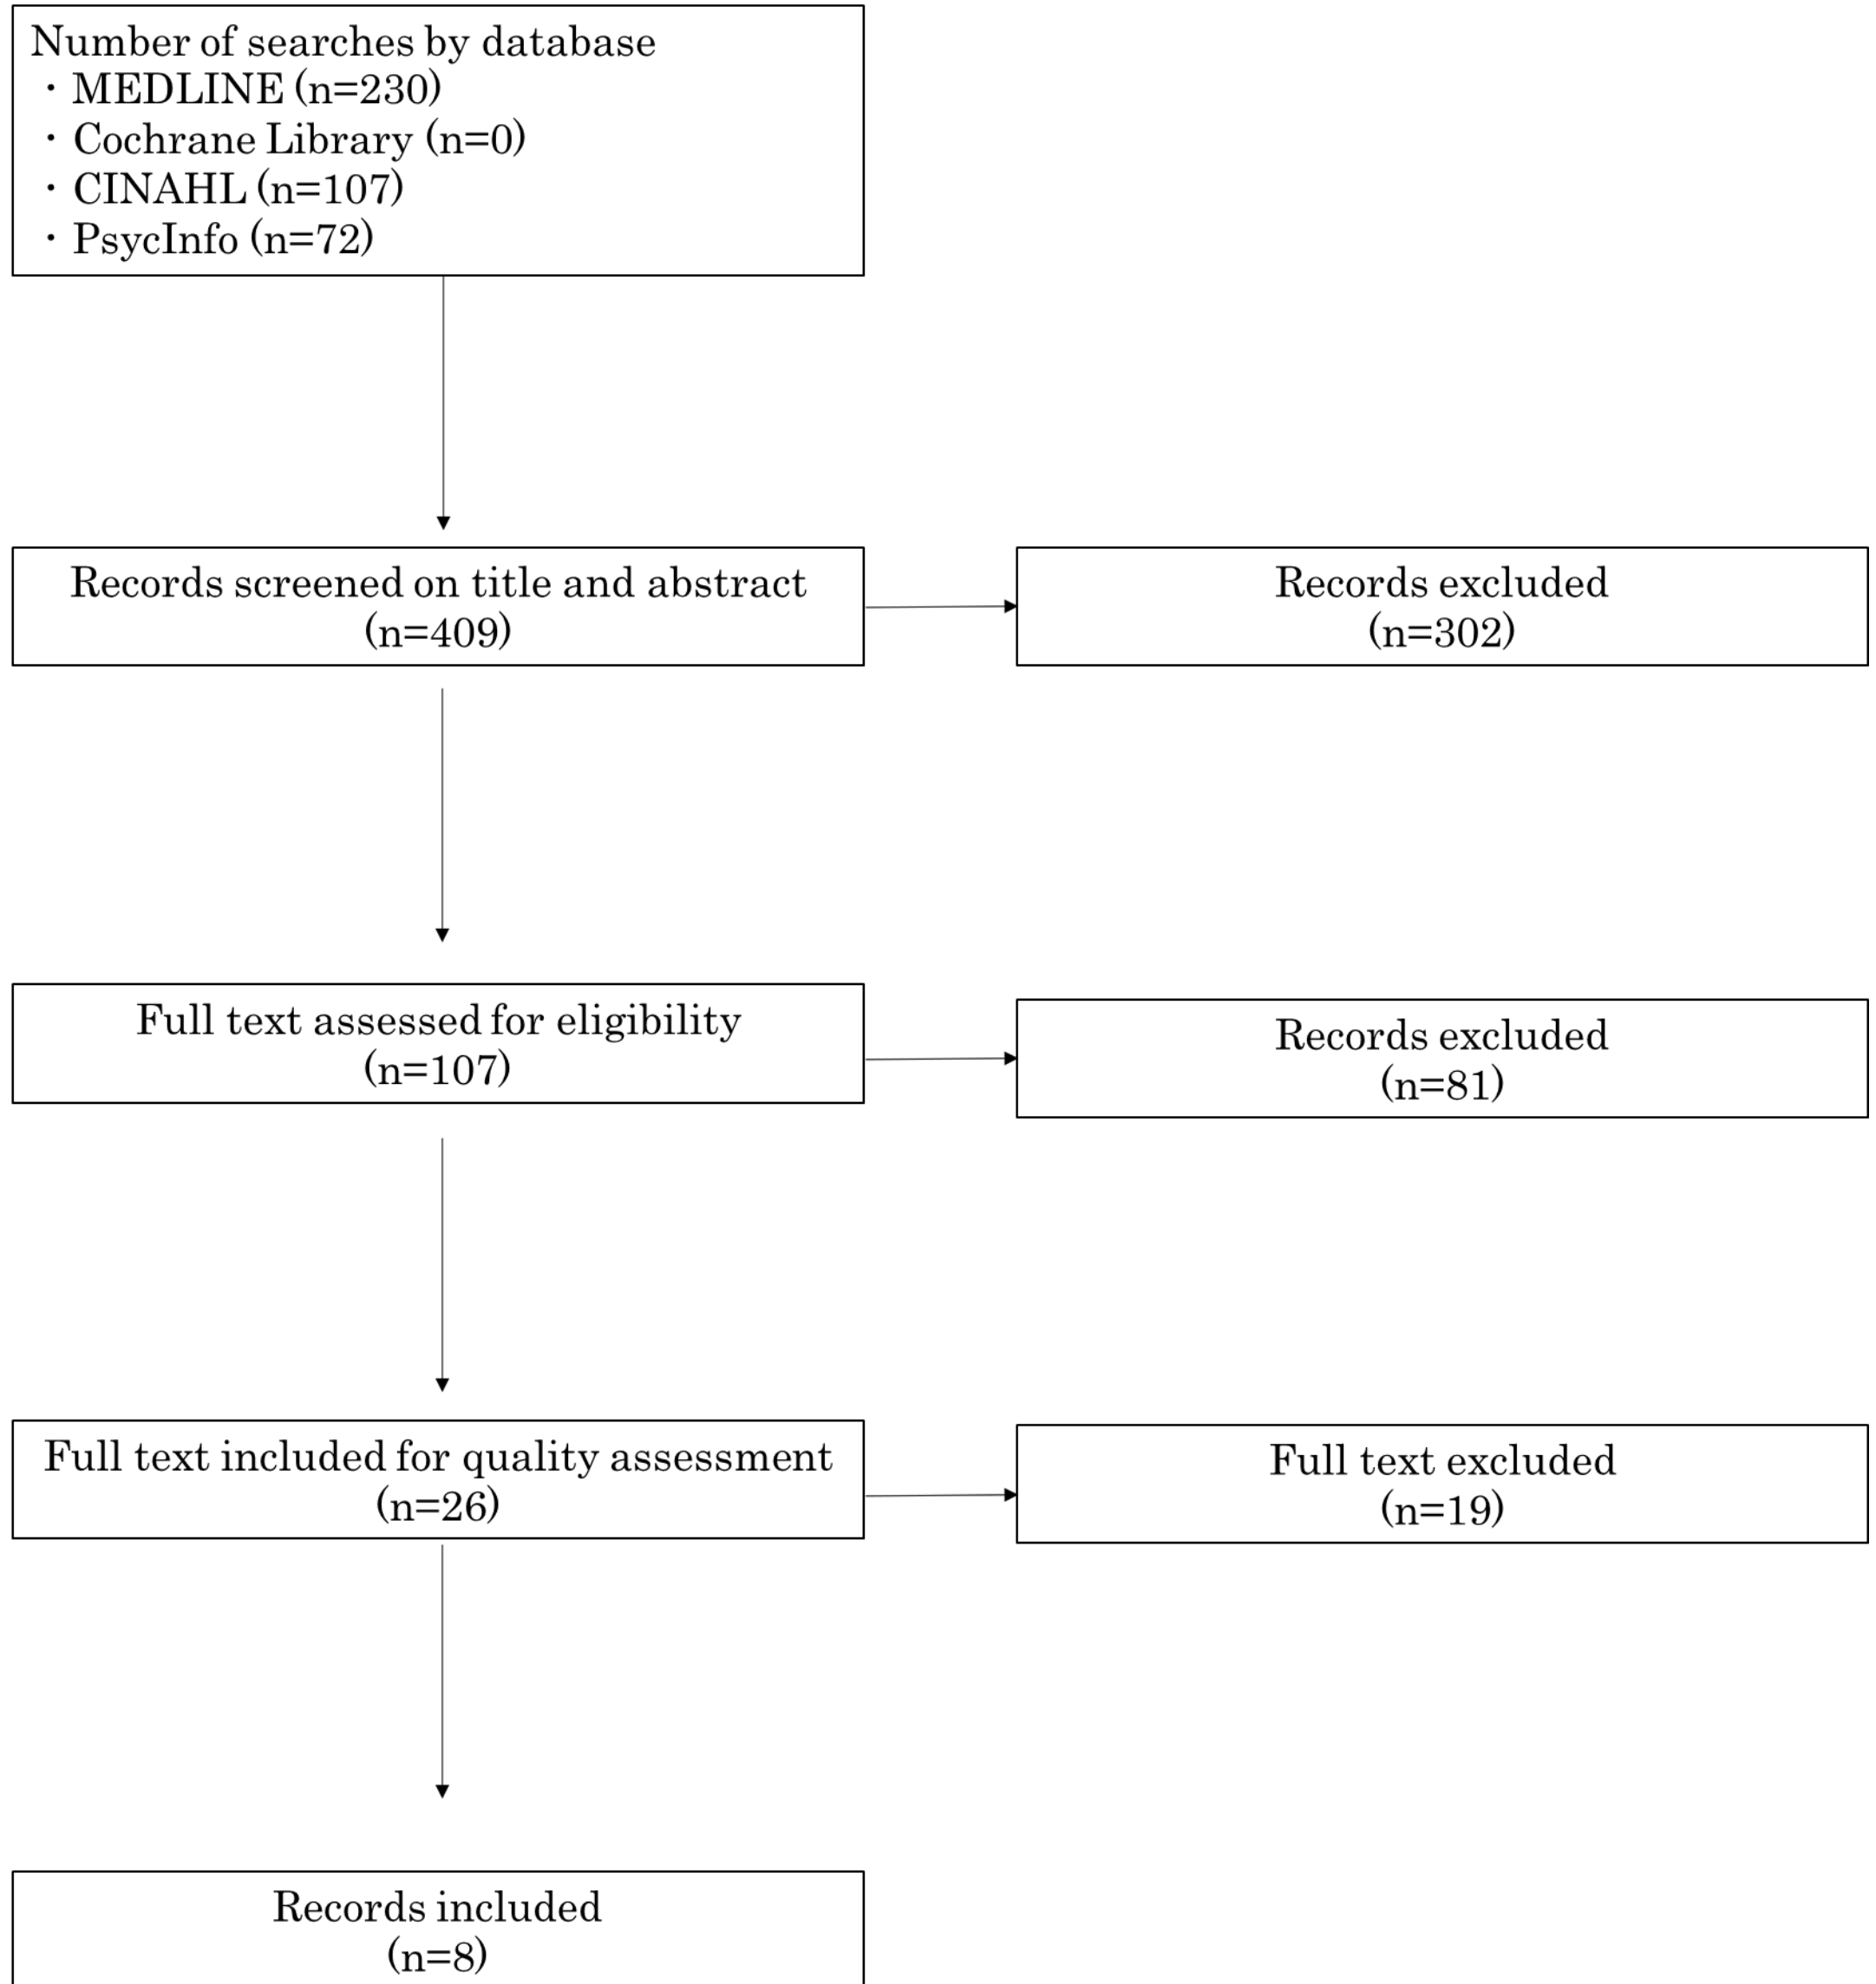

# BMJ Open

## Development and appropriateness of a scoring method for International Classification of Functioning, Disabilities, and Health assessment in older patients with heart failure: a Delphi survey of expert panel in Japan

|                                 |                                                                                                                                                                                                                                                                                                                                                                                                                                                                                                                                                                                                                                                                                                                                                                                                                                                                                                                                                                                                                                                                                                                                                                                                                                                                                                                                                                                                                                                                                                                                                                                                                                                                                                                                                                                               |
|---------------------------------|-----------------------------------------------------------------------------------------------------------------------------------------------------------------------------------------------------------------------------------------------------------------------------------------------------------------------------------------------------------------------------------------------------------------------------------------------------------------------------------------------------------------------------------------------------------------------------------------------------------------------------------------------------------------------------------------------------------------------------------------------------------------------------------------------------------------------------------------------------------------------------------------------------------------------------------------------------------------------------------------------------------------------------------------------------------------------------------------------------------------------------------------------------------------------------------------------------------------------------------------------------------------------------------------------------------------------------------------------------------------------------------------------------------------------------------------------------------------------------------------------------------------------------------------------------------------------------------------------------------------------------------------------------------------------------------------------------------------------------------------------------------------------------------------------|
| Journal:                        | <i>BMJ Open</i>                                                                                                                                                                                                                                                                                                                                                                                                                                                                                                                                                                                                                                                                                                                                                                                                                                                                                                                                                                                                                                                                                                                                                                                                                                                                                                                                                                                                                                                                                                                                                                                                                                                                                                                                                                               |
| Manuscript ID                   | bmjopen-2021-060609.R1                                                                                                                                                                                                                                                                                                                                                                                                                                                                                                                                                                                                                                                                                                                                                                                                                                                                                                                                                                                                                                                                                                                                                                                                                                                                                                                                                                                                                                                                                                                                                                                                                                                                                                                                                                        |
| Article Type:                   | Original research                                                                                                                                                                                                                                                                                                                                                                                                                                                                                                                                                                                                                                                                                                                                                                                                                                                                                                                                                                                                                                                                                                                                                                                                                                                                                                                                                                                                                                                                                                                                                                                                                                                                                                                                                                             |
| Date Submitted by the Author:   | 30-May-2022                                                                                                                                                                                                                                                                                                                                                                                                                                                                                                                                                                                                                                                                                                                                                                                                                                                                                                                                                                                                                                                                                                                                                                                                                                                                                                                                                                                                                                                                                                                                                                                                                                                                                                                                                                                   |
| Complete List of Authors:       | Shiota, Shigehito; Hiroshima University Hospital, Heart Failure Center; Hiroshima University Hospital, Department of Rehabilitation<br>Kitagawa, Toshiro; Hiroshima University Hospital, Heart Failure Center; Hiroshima University Graduate School of Biomedical and Health Sciences , Department of Cardiovascular medicine<br>Goto, Naoya; Hiroshima University Hospital, Department of Rehabilitation<br>Fujisita, Hironori; Hiroshima University Hospital, Department of Rehabilitation<br>Tamekuni, Yurika; Hiroshima University Hospital, Department of Rehabilitation<br>Nakayama, Susumu; Home nursing station Sakurazaka<br>Mio, Naoki; Hiroshima University Hospital, Heart Failure Center; Hiroshima University Hospital, Department of Rehabilitation<br>Kanai, Kana; Hiroshima University Hospital, Heart Failure Center; Hiroshima University Hospital, Department of Rehabilitation<br>Naka, Makiko; Hiroshima University Hospital, Heart Failure Center<br>Yamaguchi, Mizuho; Hiroshima University Hospital, Heart Failure Center<br>Mochizuki, Mariko; Hiroshima Care Manager Association<br>Ochikubo, Hiroyuki; Hiroshima Care Manager Association<br>Hidaka, Takayuki; Hiroshima Prefectural Hospital, Department of Cardiovascular Medicine<br>Yasunobu, Yuji; Miyoshi Medical Association Hospital, Department of Cardiovascular Medicine<br>Nakano, Yukiko; Hiroshima University Hospital, Heart Failure Center; Hiroshima University Graduate School of Biomedical and Health Sciences, Department of Cardiovascular medicine<br>Kihara, Yasuki; Hiroshima University Graduate School of Biomedical and Health Sciences<br>Kimura, Hiroaki; Hiroshima University Hospital, Heart Failure Center; Hiroshima University Hospital, Department of Rehabilitation Medicine |
| <b>Primary Subject Heading</b>: | Rehabilitation medicine                                                                                                                                                                                                                                                                                                                                                                                                                                                                                                                                                                                                                                                                                                                                                                                                                                                                                                                                                                                                                                                                                                                                                                                                                                                                                                                                                                                                                                                                                                                                                                                                                                                                                                                                                                       |
| Secondary Subject Heading:      | Health informatics, Public health, Cardiovascular medicine                                                                                                                                                                                                                                                                                                                                                                                                                                                                                                                                                                                                                                                                                                                                                                                                                                                                                                                                                                                                                                                                                                                                                                                                                                                                                                                                                                                                                                                                                                                                                                                                                                                                                                                                    |
| Keywords:                       | Heart failure < CARDIOLOGY, REHABILITATION MEDICINE, PUBLIC                                                                                                                                                                                                                                                                                                                                                                                                                                                                                                                                                                                                                                                                                                                                                                                                                                                                                                                                                                                                                                                                                                                                                                                                                                                                                                                                                                                                                                                                                                                                                                                                                                                                                                                                   |

1  
2  
3  
4  
5  
6  
7  
8  
9  
10  
11  
12  
13  
14  
15  
16  
17  
18  
19  
20  
21  
22  
23  
24  
25  
26  
27  
28  
29  
30  
31  
32  
33  
34  
35  
36  
37  
38  
39  
40  
41  
42  
43  
44  
45  
46  
47  
48  
49  
50  
51  
52  
53  
54  
55  
56  
57  
58  
59  
60

|  |                            |
|--|----------------------------|
|  | HEALTH, GERIATRIC MEDICINE |
|  |                            |

SCHOLARONE™  
Manuscripts

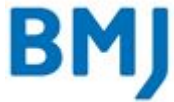

I, the Submitting Author has the right to grant and does grant on behalf of all authors of the Work (as defined in the below author licence), an exclusive licence and/or a non-exclusive licence for contributions from authors who are: i) UK Crown employees; ii) where BMJ has agreed a CC-BY licence shall apply, and/or iii) in accordance with the terms applicable for US Federal Government officers or employees acting as part of their official duties; on a worldwide, perpetual, irrevocable, royalty-free basis to BMJ Publishing Group Ltd ("BMJ") its licensees and where the relevant Journal is co-owned by BMJ to the co-owners of the Journal, to publish the Work in this journal and any other BMJ products and to exploit all rights, as set out in our [licence](#).

The Submitting Author accepts and understands that any supply made under these terms is made by BMJ to the Submitting Author unless you are acting as an employee on behalf of your employer or a postgraduate student of an affiliated institution which is paying any applicable article publishing charge ("APC") for Open Access articles. Where the Submitting Author wishes to make the Work available on an Open Access basis (and intends to pay the relevant APC), the terms of reuse of such Open Access shall be governed by a Creative Commons licence – details of these licences and which [Creative Commons](#) licence will apply to this Work are set out in our licence referred to above.

Other than as permitted in any relevant BMJ Author's Self Archiving Policies, I confirm this Work has not been accepted for publication elsewhere, is not being considered for publication elsewhere and does not duplicate material already published. I confirm all authors consent to publication of this Work and authorise the granting of this licence.

1  
2  
3  
4  
5  
6  
7  
8  
9  
10  
11  
12  
13  
14  
15  
16  
17  
18  
19  
20  
21  
22  
23  
24  
25  
26  
27  
28  
29  
30  
31  
32  
33  
34  
35  
36  
37  
38  
39  
40  
41  
42  
43  
44  
45  
46  
47  
48  
49  
50  
51  
52  
53  
54  
55  
56  
57  
58  
59  
60

1 Original research

2

3 **Development and appropriateness of a scoring method for International**  
4 **Classification of Functioning, Disabilities, and Health assessment in older patients**  
5 **with heart failure: a Delphi survey of expert panel in Japan**

6

7 Shigehito Shiota<sup>1,2</sup>, Toshiro Kitagawa<sup>1,3</sup>, Naoya Goto<sup>2</sup>, Hironori Fujisita<sup>2</sup>, Yurika  
8 Tamekuni<sup>2</sup>, Susumu Nakayama<sup>4</sup>, Naoki Mio<sup>1,2</sup>, Kana Kanai<sup>1,2</sup>, Makiko Naka<sup>1</sup>, Mizuho  
9 Yamaguchi<sup>1</sup>, Mariko Mochizuki<sup>5</sup>, Hiroyuki Ochikubo<sup>5</sup>, Takayuki Hidaka<sup>6</sup>, Yuji Yasunobu<sup>7</sup>,  
10 Yukiko Nakano<sup>1,3</sup>, Yasuki Kihara<sup>8</sup>, Hiroaki Kimura<sup>1,9</sup>

11

12 <sup>1</sup> Heart Failure Centre, Hiroshima University Hospital, Hiroshima, Japan

13 <sup>2</sup> Division of Clinical Support, Department of Rehabilitation, Hiroshima University  
14 Hospital, Hiroshima, Japan

15 <sup>3</sup> Hiroshima University Graduate School of Biomedical and Health Sciences, Hiroshima,  
16 Japan

17 <sup>4</sup> Home nursing station Sakurazaka, Hiroshima, Japan

18 <sup>5</sup> Hiroshima Care Manager Association, Hiroshima, Japan.

19 <sup>6</sup> Department of Cardiovascular Medicine, Hiroshima Prefectural Hospital, Hiroshima,  
20 Japan

21 <sup>7</sup> Department of Cardiovascular Medicine, Miyoshi Medical Association Hospital,  
22 Hiroshima, Japan

23 <sup>8</sup> Hiroshima University Graduate School of Biomedical and Health Sciences, Hiroshima,  
24 Japan

25 <sup>9</sup> Department of Rehabilitation Medicine, Hiroshima University Hospital, Hiroshima,  
26 Japan

27



1  
2  
3  
4  
5  
6 28 Word count: 4932 words  
7  
8

9  
10 29 **Corresponding author:**  
11

12 30 Shigehito Shiota  
13

14  
15 31 Email: [sshiota@hiroshima-u.ac.jp](mailto:sshiota@hiroshima-u.ac.jp)  
16

17  
18 32 Address: 1-2-3, Kasumi, Minami-ku, Hiroshima City, Hiroshima, Japan  
19

20 33  
21  
22  
23  
24  
25  
26  
27  
28  
29  
30  
31  
32  
33  
34  
35  
36  
37  
38  
39  
40  
41  
42  
43  
44  
45  
46  
47  
48  
49  
50  
51  
52  
53  
54  
55  
56  
57  
58  
59  
60

## 34 **ABSTRACT**

35 **Objective:** The number of older patients with heart failure (HF) is increasing in Japan  
36 and has become a social problem. There is an urgent need to develop a comprehensive  
37 assessment methodology based on the common language of health care; the  
38 International Classification of Functioning, Disability and Health (ICF). The purpose of  
39 this study was to develop and confirm the appropriateness of a scoring methodology for  
40 43 ICF categories in older people with HF.

41 **Design:** Cross-sectional survey. We applied the RAND/UCLA Appropriateness Method  
42 with a modified Delphi method.

43 **Setting and participants:** We included a panel of 26 multidisciplinary experts on HF  
44 care consisting of home physicians, cardiovascular physicians, care managers, nurses,  
45 physical therapists, a pharmacist, occupational therapist, nutritionist, and a social worker.

46 **Measures:** We conducted a literature review of ICF linking rules and developed a  
47 questionnaire on scoring methods linked to ICF categories in older people with HF. In  
48 the Delphi rounds, we sent the expert panel a questionnaire consisting of three questions  
49 for each of the 43 ICF categories. The expert panel responded to the questionnaire items  
50 on a 1 (very inappropriate) – 9 (very appropriate) Likert scale and repeated rounds until  
51 a consensus of 'Appropriate' and 'Agreement' was reached on all items.

52 **Results:** A total of 21 panel members responded to all the Delphi rounds. In the first  
53 Delphi round, six question items in four ICF categories did not reach a consensus of  
54 'Agreement', but the result of our modifications based on panel members' suggestions  
55 reached to a consensus of 'Appropriate' and 'Agreement' on all questions in the second  
56 Delphi round.

57 **Conclusion:** The ICF-based scoring method for older people with HF developed in this  
58 study was found to be appropriate. Future work is needed to clarify whether  
59 comprehensive assessment and information sharing based on ICF contributes to  
60 preventing readmissions.

61  
62 **Keywords:** heart failure, older people, ICF, scoring methods, RAND/UCLA  
63 Appropriateness Method

### 64 65 **Strengths and limitations of this study**

66 ► An expert panel familiar with heart failure care, consisting of home physicians, care  
67 managers, and multidisciplinary medical professionals, rated the "appropriateness" of  
68 the questions in each ICF category through a multiple-round process to reach a  
69 consensus.

- 1  
2  
3  
4  
5  
6 70 ▶ The assessment domains studied the 43-item ICF relevant to older adults with heart  
7 71 failure, covering not only the medical assessment but also the physical and mental  
8 72 functioning, activity and social participation, and environmental factors.  
9  
10 73 ▶The expert panel comprised general practitioners, cardiologists, and paramedical  
11 74 professions (rehabilitation, nursing care, and welfare), but caution is needed in  
12 75 generalizing the findings because of the study's limited geographical area.  
13  
14  
15 76

16  
17  
18  
19  
20  
21  
22  
23  
24  
25  
26  
27  
28  
29  
30  
31  
32  
33  
34  
35  
36  
37  
38  
39  
40  
41  
42  
43  
44  
45  
46  
47  
48  
49  
50  
51  
52  
53  
54  
55  
56  
57  
58  
59  
60

For peer review only

## 77 INTRODUCTION

78 In Japan, cardiovascular disease is the second leading cause of death. [1] In addition,  
79 cardiovascular disease accounts for 20.6% of all cases requiring nursing care, and the  
80 annual medical costs exceed 6 trillion yen (USD 46 billion). [2,3] The Japanese  
81 government has approved the Japanese National Plan for Promotion of Measures  
82 Against Cerebrovascular and Cardiovascular Disease in 2020. This Japanese National  
83 Plan promotes the establishment of a comprehensive community care system that  
84 encompasses health, medical care, welfare, nursing care, and the sharing of evidence-  
85 based information. [4,5]

86 Among cardiovascular diseases, heart failure (HF) is increasing with the ageing of the  
87 population, with the number of patients in Japan expected to exceed 1.3 million by 2030.  
88 [6,7] HF reduces the quality of life of patients and their families by repeated  
89 rehospitalizations due to exacerbations, and the increased burden of medical expenses.  
90 [8-10] The one-year readmission rate for patients with HF is 35% in Japan, but a study  
91 of elderly patients with HF in the United States reported a rate of 64%. [11,12] Elderly  
92 patients with HF have multiple comorbidities, such as atrial fibrillation, chronic renal  
93 failure, dementia, and depression, which are factors associated with readmission. [13] In  
94 addition, many factors have been reported to be associated with readmission in patients  
95 with HF, including cognitive function, depression/anxiety, exercise tolerance, muscle  
96 strength, walking speed, activities of daily living (ADL), and instrumental activities of daily  
97 living (IADL). [14-18] The Guideline on Diagnosis and Treatment of Acute and Chronic  
98 Heart Failure (JCS 2017/ JHFS 2017) recommends that patients with limited self-care  
99 capabilities, such as elderly patients with HF, should receive education and support from  
100 their families and actively utilise social resources such as home physicians and home-  
101 visit nursing. [19] Social support and information sharing in the community have been  
102 reported to prevent HF readmissions, and there is an urgent need to establish an  
103 information sharing system between medical professionals and care professionals in the  
104 community. [20,21]

105 The Japanese Society of Heart Failure recommends the use of the International  
106 Classification of Functioning, Disability and Health (ICF) for the comprehensive  
107 assessment and multidisciplinary information sharing in elderly patients with HF. [22] The  
108 ICF was introduced by the WHO in 2001; it aims to provide a framework for health and  
109 health-related conditions. The ICF is expected to be used as a common language for  
110 patients, their families, medical professionals, and caregivers. [23] However, the ICF has  
111 not been widely used in clinical practice because of the complexity of the coding and the  
112 unreliability of the scores. [24-28] To promote the use of the ICF in clinical practice, the

1  
2  
3  
4  
5  
6 113 World Health Organisation provides the ICF Core Set and the ICF Linking Rules. The  
7 114 ICF Core Set is a set of identified ICF categories for assessing a patient's special health  
8 115 condition or special medical background. [29] The ICF Linking Rules are a method of  
9 116 linking ICF categories with existing assessment methods. [30,31] The ICF core set for  
10 117 chronic ischaemic heart disease and the Geriatric ICF core set have already been  
11 118 developed, but these ICF categories are not appropriate for adaptation to older patients  
12 119 with heart failure. [32,33] Therefore, 43 ICF categories were selected for the  
13 120 comprehensive assessment of older patients with HF through the questionnaire survey  
14 121 of a multidisciplinary group of medical professionals and care professionals. [34,35] The  
15 122 43 ICF categories specific to older patients with HF consisted of 17 body functions and  
16 123 one body structure, 19 activities and participation, and 6 environmental factors. However,  
17 124 in order to efficiently utilize ICF-based assessments in clinical practice, it is necessary to  
18 125 develop scoring methods linked to existing assessments.

19 126 The purpose of this study was to develop a scoring method of older patients with HF  
20 127 based on the ICF, and to determine its appropriateness using the Delphi technique.  
21 128

22 129

## 23 130 **METHOD**

### 24 131 **Patient and public involvement**

25 132 Patients and the public are not involved in the design, planning, conduct or reporting of  
26 133 this study.  
27 134

28 135

### 29 136 **Design**

30 137 We applied the Delphi method to an expert panel. The Delphi method is a consensus  
31 138 method used in the development of guidelines and clinical indicators, and is effective in  
32 139 guiding assessments and treatments for which there is limited evidence. The Delphi  
33 140 method is also a standard practice in the development of ICF Core Sets. [29] We  
34 141 developed a questionnaire based on the literature review and structured a two-stage  
35 142 Delphi survey with an expert panel, referring to the RAND/UCLA appropriateness  
36 143 methodology. [36] (Figure 1).  
37 144

38 145

### 39 146 **Establishing of the expert panel**

40 147 We established an expert multidisciplinary panel consisting of 26 medical and care  
41 148 professionals in Hiroshima Prefecture, Japan. The members of the expert committee  
42 149 were professionals with leadership roles in community care, all of whom have expertise  
43 150 in the assessment, treatment, and care of older patients with heart failure. Five home  
44 151 physicians and ten care managers were recommended by the Hiroshima Care Manager  
45 152  
46 153  
47 154  
48 155  
49 156  
50 157  
51 158  
52 159  
53 160

1  
2  
3  
4  
5  
6 149 Association. All five home physicians are specialists in internal medicine who engage in  
7 150 home visits while all ten care managers are board members of the Hiroshima Care  
8  
9 151 Manager Association and leaders in their respective communities. In addition, we  
10 152 included 11 medical multidisciplinary professionals involved in HF care at specialised  
11 153 medical institutions recommended by the Hiroshima Heart Health Promotion Project in  
12 154 our panel .[37] The 11 medical multidisciplinary members were: two cardiovascular  
13 155 physicians, three nurses certified in chronic HF nursing, two physiotherapists with  
14 156 registered instructors of cardiac rehabilitation, one occupational therapist with registered  
15 157 instructors of cardiac rehabilitation, one certified pharmacist, one nutritionist, and one  
16 158 social worker.  
17  
18  
19  
20  
21

159

### 160 **Development of the questionnaire**

161 We developed scoring methods for the 43 ICF categories linking to existing  
162 assessment batteries. [34,35] To develop the questionnaire, we first conducted a  
163 literature review of the ICF linking rules. The ICF linking rules are a systematic  
164 methodology for linking the existing assessment batteries to the ICF codes. [30,31] All  
165 articles related to the ICF linking rule from January, 2005 to August, 2020 were included  
166 in the study. We used MEDLINE (PubMed), Cochrane Library, CINAHL, and PsycInfo  
167 as electronic article databases. The search terms in the electronic article database were  
168 "ICF" and "Linking rule" or "Rasch" in medical subject headings (MeSH). The search  
169 criteria were as follows: (1) written in English, (2) cross-sectional study, cohort study, or  
170 case-control study, (3) target group of people aged 18 years or older, (4) use of an  
171 existing assessment battery, (5) results from ICF data or Rasch analysis of the ICF data,  
172 and (6) "ICF" and "linking rule" present in the title. The literature review was carried out  
173 by five authors (SS, NG, HF, SN, and YT) in two phases. In the first phase, the  
174 appropriateness of the titles and abstracts were assessed based on the search criteria.  
175 In the second phase, the full text was assessed. Finally, we conducted a qualitative  
176 analysis of the articles to select an assessment battery that could be adapted to older  
177 patients with HF and to clarify its association with the 43 ICF categories. We completed  
178 the questionnaire based on the results of this literature review and the explanatory notes  
179 in the ICF Reference Guide. [38,39] We set three questions for each of the 43 ICF  
180 categories and prepared 1 (very inappropriate) - 9 (very appropriate) Likert scale  
181 responses to assess appropriateness. Appropriateness was evaluated on a median  
182 response scale with the following three levels: 1-3 as "inappropriate", 4-6 as "uncertain",  
183 and 7-9 as "appropriate". The three questionnaire items were as follows: 1)  
184 Appropriateness of the 43 ICF category scoring descriptions, 2) appropriateness of

1  
2  
3  
4  
5  
6 185 existing assessment batteries linked to each ICF categories, and 3) appropriateness of  
7 186 the scoring methods for each ICF categories linked to existing assessment batteries. All  
8  
9 187 questionnaires were developed using a Google Form, with a description of each ICF  
10 188 category and the rationale for scoring. (Supplemental materials 1).  
11  
12 189

### 13 190 **Delphi process and funding consensus**

14  
15 191 The Delphi process for reaching a consensus is shown in Figure 1. Before conducting  
16 192 the Delphi survey, the HF Centre (HFC) held an online meeting for the panel members.  
17  
18 193 In the online meeting, we explained the purpose of our study and the methods of the  
19 194 Delphi process to the panel members and obtained their consent to participate in the  
20  
21 195 study. In the first round, the HFC mailed a sheet with instructions on how to conduct the  
22 196 ICF category adequacy assessment, as well as the URL and QR codes for the  
23  
24 197 questionnaire. The panel members responded to three questions in 43 ICF categories  
25 198 on a scale of 1-9. In addition, panel members provided open-ended suggestions for  
26  
27 199 improvements to the questions they scored 1-6. The HFC collated the panel members'  
28 200 responses. We revised the scoring descriptions and existing assessment batteries linked  
29  
30 201 to the ICF categories responded to as 'Inappropriate', 'Uncertain' or 'Disagreement'  
31 202 based on the panel's suggestions. The definition of 'Disagreement' in this article is given  
32  
33 203 in Analysis. In the second round, the HFC emailed the revised questionnaire and  
34 204 feedback based on the panel members' responses. As in the first round, the panel  
35  
36 205 members rated the appropriateness of three question items in the 43 ICF categories. In  
37 206 addition, the panel members provided suggestions for improvements to the scoring  
38  
39 207 methods on those ones scored 1-6. The HFC compiled the panel members' responses  
40 208 and assessed their appropriateness. We also revised the descriptions of the  
41  
42 209 questionnaire or scoring methods based on the panel's suggestions. The revised  
43 210 questionnaire was emailed to the panel members, and a final consensus was reached  
44  
45 211 after confirming that there were no comments for revision.  
46  
47 212

### 48 213 **Analysis**

49 214 Following the RAND/UCLA appropriateness methodology [28], we used the median  
50 215 scores of the responses from the panellists to assess appropriateness. We rated the  
51 216 appropriateness of the 43 ICF categories for the assessment method as 'Appropriate' if  
52  
53 217 the median respondent's score was 7-9, 'Uncertain' if it was 4-6 and 'Inappropriate' if it  
54  
55 218 was 1-3. In accordance with the RAND/UCLA guidelines, we defined 'Agreement' or  
56  
57 219 'Disagreement' according to the number of panellists who rated outside the range of  
58 220 tertiles (1-3; 4-6; 7-9) including the median. 'Agreement' was defined as fewer than one-

221 third of panellists who rated outside the range of the tertile values. 'Disagreement' was  
 222 defined as when more than one-third of panellists rated the extremes (1-3 range and 7-  
 223 9 range) not including the median.

224

## 225 **Ethics**

226 This study was conducted in accordance with the principles of the Declaration of  
 227 Helsinki. We explained the purpose and content of the study in writing and at online  
 228 meetings to the expert panel members who participated in the study and obtained their  
 229 written consent. The received data was processed after deleting personal information  
 230 (names). Approval was obtained from the Ethical Review Committee for Epidemiological  
 231 Research, Hiroshima University (Approval No: E-2580). This study was supported by the  
 232 MHLW Comprehensive Research on Statistical Information Program, Grant Number  
 233 JPMH20AB1002.

234

## 235 **RESULTS**

### 236 **Characteristics of the expert panel participants**

237 A total of 26 experts agreed to participate in the study. In the first round, 24 of the 26  
 238 invited experts responded to the questionnaire. In the second Delphi round, 21 experts  
 239 responded to the questionnaires. Table 1 shows the characteristics of the experts who  
 240 responded to all Delphi rounds.

241

242 Table 1 Characteristics of the expert panel participants who responded to all Delphi  
 243 rounds (n = 21)

| Characteristics           | n (%)     |
|---------------------------|-----------|
| Sex                       |           |
| Male                      | 8 (38.1)  |
| Female                    | 13 (61.9) |
| Professions               |           |
| Home physicians           | 4 (19.0)  |
| Cardiovascular physicians | 1 (4.8)   |
| Care managers             | 9 (42.8)  |
| Nurses                    | 3 (14.3)  |
| Pharmacist                | 1 (4.8)   |
| Physical therapists       | 2 (9.5)   |
| Occupational therapist    | 1 (4.8)   |
| Type of facilities        |           |



|                                            |          |
|--------------------------------------------|----------|
| Hospital: Acute care ward                  | 6 (28.6) |
| Hospital: Rehabilitation ward              | 2 (9.5)  |
| Clinic                                     | 4 (19.0) |
| Regional comprehensive support centre      | 2 (9.5)  |
| Community care centre/Home nursing station | 6 (28.6) |
| Municipal office                           | 1 (4.8)  |

244

### 245 **Development of the Delphi questionnaire of ICF assessment method for older** 246 **patients with heart failure**

247 Figure 2 showed the process of literature review. A total of 409 references were  
 248 extracted from the literature survey. The breakdown of each article database was as  
 249 follows: MEDLINE (PubMed), 230 articles; Cochrane Library, 0 articles; CINAHL, 107  
 250 articles; PsycInfo, 72 articles. In the primary screening, 107 references were extracted,  
 251 and in the secondary screening, 26 references were extracted. Finally, two references  
 252 were excluded, and the total number of eligible references was 26. In the qualitative  
 253 analysis, we excluded 19 references dealing with disease-specific assessment batteries  
 254 that could not be adapted to older patients with HF (e.g., stroke, musculoskeletal disease,  
 255 hand surgery, low back pain). Eight articles on ICF linking rules were included. Finally,  
 256 we employed 11 existing assessment batteries on eight articles links to the 43 ICF  
 257 categories (Supplemental material 2). [40-47] Eleven existing assessment batteries were  
 258 included: assessment of ADL (such as Functional Independence Measure (FIM) and  
 259 Barthel Index), assessment of general health-related quality of life (such as Short Form  
 260 36 and the European Quality of Life instrument (EQ-5D), The World Health Organization  
 261 Quality of Life (WHOQOL)), assessment of general health status (such as the  
 262 Nottingham Health Profile(NHP), the World Health Organization Disability Assessment  
 263 Schedule (WHODAS 2.0)), and assessment of falls (such as Falls Efficacy Scale-  
 264 International (FES-I), the Swedish version of the Falls Efficacy Scale (FES[S]), the  
 265 Activities-specific Balance Confidence Scale (ABC), and the modified Survey of Activities  
 266 and Fear of Falling in the Elderly (SAFFE)). We identified these existing assessment  
 267 batteries as linked to 20 of the 43 categories. However, only the FIM and BI were  
 268 employed in the questionnaire, as they did not match the objectives of this study for the  
 269 assessment of general health-related quality of life, general health status and falls.  
 270 Therefore, we developed a scoring methodology for ICF categories other than ADL,  
 271 based on the Italian ICF Guidelines and the ICF Reference Guide. [38,39, 48] Finally,  
 272 we decided to provide 30 existing assessment batteries linking to ICF categories, and to  
 273 score the remaining 13 categories using only the scoring descriptions (Table 2).

10

274

**275 Delphi round 1**

276 From February to March of 2021, 24 panel members (92.3%) responded to Round 1 of  
277 the Delphi process. 'Agreement' was defined as when seven or fewer panellists rated  
278 outside the range of the three quartiles (1-3; 4-6; 7-9), including the median.  
279 'Disagreement' was defined as eight or more panellists rating the extremes (1-3 range  
280 and 7-9 range) that did not include the median. The results of the Delphi round 1 panel  
281 members' responses are shown in Supplementary material 3. The median response of  
282 panel members was 'appropriate' 7-9 for all three questions in the 43 ICF categories. In  
283 the result, 'Agreement' was not reached on six question items in four ICF categories.  
284 'Agreement' was not reached on six questions in four ICF categories. The question items  
285 in the ICF categories on which agreement was not reached were 'b134 Sleep functions:  
286 1) scoring descriptions, b410 Heart function: 2) existing assessment batteries and 3)  
287 scoring methods linked to ICF categories, s410 Structure of the cardiovascular systems:  
288 2) existing assessment battery and 3) scoring methods linked to ICF categories and d330  
289 Speaking: 2) existing battery of assessments'. We added a scoring method for d134  
290 Sleep function based on the Pittsburgh Sleep Quality Index, based on the panel  
291 members' suggestions. For b410 heart function, S410 Structure of cardiovascular  
292 system and d330 Speaking, we revised the existing assessment battery and scoring  
293 method linked to the ICF categories based on the panel's suggestions.

294

**295 Delphi round 2**

296 From April to May of 2021, we emailed the revised questionnaire to the 24 panel  
297 members who responded to Round 1. Twenty-one panel members (87.5%) responded  
298 to the Round 2 questionnaire. 'Agreement' was defined as when six or fewer panellists  
299 rated outside the range of the three quartiles (1-3; 4-6; 7-9), including the median.  
300 'Disagreement' was defined as seven or more panellists rating the extremes (1-3 range  
301 and 7-9 range) that did not include the median. Table 2 shows the results of the panel  
302 members' responses to Delphi Round 2. The results showed that for all ICF category  
303 questions, the median responses ranged from 7 to 9 'Appropriate', with all items reaching  
304 'Agreement'. However, as two panel members answered 'Inappropriate' 1-3 for the d450  
305 gait, we modified the existing assessment battery linked to the ICF categories to FIM  
306 only, based on members' suggestions. We sent the manual of the modified assessment  
307 method by e-mail to all panel members who participated in Round 2, asking for their  
308 comments, and confirming that we had reached a consensus.

309

310

311 Table 2: Results of the three questions of the 43 ICF categories in the second Delphi  
312 round.

| ICF categories |     | Existing assessment batteries linked to ICF categories              | Question Items                                                 |                                        |                                                                                   |                                        |                                                                                                           |                                        |   |
|----------------|-----|---------------------------------------------------------------------|----------------------------------------------------------------|----------------------------------------|-----------------------------------------------------------------------------------|----------------------------------------|-----------------------------------------------------------------------------------------------------------|----------------------------------------|---|
|                |     |                                                                     | 1) Appropriateness of ICF 43 category scoring descriptions     |                                        | 2) Appropriateness of existing assessment batteries linked to each ICF categories |                                        | 3) Appropriateness of the scoring methods for each ICF categories linked to existing assessment batteries |                                        |   |
|                |     |                                                                     | median score (/9)                                              | Number of outside median tertile (/21) | median score (/9)                                                                 | Number of outside median tertile (/21) | median score (/9)                                                                                         | Number of outside median tertile (/21) |   |
| 10             | 110 | Consciousness function                                              | Japan Coma Scale                                               | 8                                      | 3                                                                                 | 9                                      | 2                                                                                                         | 8                                      | 1 |
| 11             | 114 | Orientation function                                                | Mimi-Mental State Examination                                  | 8                                      | 3                                                                                 | 8                                      | 4                                                                                                         | 8                                      | 2 |
| 12             | 130 | Energy and drive function                                           | Vitality Index                                                 | 8                                      | 2                                                                                 | 8                                      | 3                                                                                                         | 8                                      | 2 |
| 13             | 134 | Sleep function                                                      | Pittsburgh Sleep Quality Index                                 | 8                                      | 2                                                                                 | 8                                      | 2                                                                                                         | 7                                      | 4 |
| 14             | 164 | Higher-level cognitive functions                                    | Frontal Assessment Battery                                     | 8                                      | 2                                                                                 | 8                                      | 2                                                                                                         | 8                                      | 3 |
| 15             | 410 | Heart function                                                      | Echocardiography; left ventricular function, Electrocardiogram | 7                                      | 4                                                                                 | 8                                      | 3                                                                                                         | 7                                      | 3 |
| 16             | 415 | Blood vessel function                                               | Fontaine classification                                        | 8                                      | 4                                                                                 | 8                                      | 2                                                                                                         | 8                                      | 4 |
| 17             | 420 | Blood pressure function                                             | Blood pressure                                                 | 8                                      | 4                                                                                 | 8                                      | 1                                                                                                         | 8                                      | 2 |
| 18             | 440 | Respiration function                                                | SpO <sub>2</sub> , Respiration Rate                            | 8                                      | 2                                                                                 | 8                                      | 3                                                                                                         | 8                                      | 1 |
| 19             | 455 | Exercise tolerance function                                         | Specific Activity Scale                                        | 8                                      | 2                                                                                 | 8                                      | 3                                                                                                         | 8                                      | 1 |
| 20             | 460 | Sensations associated with cardiovascular and respiratory functions | NYHA classification                                            | 8                                      | 2                                                                                 | 8                                      | 1                                                                                                         | 9                                      | 1 |
| 21             | 525 | Defaecation function                                                | -                                                              | 8                                      | 3                                                                                 | -                                      | -                                                                                                         | -                                      | - |
| 22             | 530 | Weight maintenance functions                                        | Body Mass Index                                                | 8                                      | 3                                                                                 | 8                                      | 3                                                                                                         | 8                                      | 3 |
| 23             | 545 | Water, mineral and electrolyte balance functions                    | Blood test: Na, K                                              | 8                                      | 4                                                                                 | 8                                      | 3                                                                                                         | 7                                      | 3 |
| 24             | 620 | Urination function                                                  | -                                                              | 8                                      | 4                                                                                 | -                                      | -                                                                                                         | -                                      | - |

1  
2  
3  
4

|                               |                                                 |                                                                       |   |   |   |   |   |   |
|-------------------------------|-------------------------------------------------|-----------------------------------------------------------------------|---|---|---|---|---|---|
| 5<br>6b710                    | Mobility of joint function                      | Range Of Motion                                                       | 8 | 3 | 8 | 3 | 8 | 2 |
| 7<br>8b730<br>9               | Muscle power function                           | Manual Muscle Test or five-times sit-to-stand                         | 8 | 3 | 8 | 3 | 8 | 4 |
| 10<br>11<br>12a10<br>13<br>14 | Structure of the cardiovascular system          | Echocardiography; Severity of valve function<br>Chest radiograph; CTR | 7 | 3 | 7 | 3 | 8 | 2 |
| 15<br>16177                   | Making decisions                                | -                                                                     | 8 | 3 | - | - | - | - |
| 16<br>17<br>18<br>19<br>20    | Carrying out daily routine                      | -                                                                     | 8 | 2 | - | - | - | - |
| 21<br>22<br>23                | Communicating with-receiving-spoken messages    | FIM; Comprehension                                                    | 8 | 2 | 8 | 1 | 8 | 1 |
| 24<br>25<br>26                | Speaking                                        | FIM; Expression                                                       | 8 | 2 | 8 | 1 | 8 | 2 |
| 27<br>28<br>29                | Transferring oneself                            | FIM; Transfers                                                        | 8 | 1 | 8 | 1 | 8 | 1 |
| 30<br>31<br>32                | Walking                                         | FIM; Walk<br>5-m walk test                                            | 8 | 1 | 8 | 2 | 8 | 5 |
| 33<br>34<br>35                | Washing oneself                                 | FIM; Bathing                                                          | 8 | 1 | 8 | 1 | 8 | 1 |
| 36<br>37<br>38                | Caring for body parts                           | FIM; Grooming                                                         | 7 | 1 | 8 | 2 | 7 | 1 |
| 39<br>40<br>41                | Toileting                                       | FIM; Toileting                                                        | 7 | 2 | 9 | 2 | 7 | 3 |
| 42<br>43<br>44                | Dressing                                        | FIM; Dressing                                                         | 8 | 1 | 8 | 1 | 8 | 1 |
| 45<br>46<br>47                | Eating/ Drinking                                | FIM; Eating                                                           | 8 | 1 | 8 | 2 | 8 | 3 |
| 48<br>49<br>50                | Looking after one's health                      | -                                                                     | 8 | 3 | - | - | - | - |
| 51<br>52<br>53                | Acquisition of goods and services               | Instrumental Activities of Daily Living scale; Shopping               | 8 | 4 | 8 | 3 | 8 | 3 |
| 54<br>55<br>56                | Preparing meals                                 | Instrumental Activities of Daily Living scale; Food preparation       | 8 | 2 | 8 | 1 | 8 | 3 |
| 57<br>58<br>59                | Doing housework                                 | Instrumental Activities of Daily Living scale; Housekeeping           | 8 | 4 | 8 | 3 | 8 | 3 |
| 60                            | Basic interpersonal interactions                | -                                                                     | 8 | 3 | - | - | - | - |
|                               | Family relationships                            | -                                                                     | 8 | 3 | - | - | - | - |
|                               | Recreation and leisure                          | -                                                                     | 8 | 2 | - | - | - | - |
|                               | Immediate family                                | -                                                                     | 8 | 3 | - | - | - | - |
|                               | Personal care providers and personal assistants | -                                                                     | 8 | 2 | - | - | - | - |
|                               | Health professionals                            | -                                                                     | 8 | 1 | - | - | - | - |
|                               | Individual attitudes of immediate               | -                                                                     | 8 | 2 | - | - | - | - |

59  
60

1  
2  
3  
4  
5  
6  
7  
8  
9  
10  
11  
12  
13  
14  
15  
16  
17  
18  
19  
20  
21  
22  
23  
24  
25  
26  
27  
28  
29  
30  
31  
32  
33  
34  
35  
36  
37  
38  
39  
40  
41  
42  
43  
44  
45  
46  
47  
48  
49  
50  
51  
52  
53  
54  
55  
56  
57  
58  
59  
60

|                |                                                        |   |   |   |   |   |   |   |
|----------------|--------------------------------------------------------|---|---|---|---|---|---|---|
| 6              | family members                                         |   |   |   |   |   |   |   |
| 7<br>8<br>9    | General social support services, systems, and policies | - | 8 | 2 | - | - | - | - |
| 10<br>11<br>12 | Health services, systems, and policies                 | - | 8 | 3 | - | - | - | - |

313

314 SpO<sub>2</sub>, oxygen saturation; NYHA, New York Heart Association; CTR, cardiothoracic ratio;  
315 FIM, Functional Independence Measure.

316

### 317 DISCUSSION

318 We have developed a comprehensive assessment for older people with HF based on  
319 ICF for widespread use in clinical practice and verified the appropriateness of the scoring  
320 method using the RAND Delphi method. In this study, we drew on our literature review  
321 and the ICF Reference Guide to link existing assessment batteries for 28 of the 43 ICF  
322 categories. In the first Delphi round, 'agreement' was not reached on six questions in the  
323 four ICF categories, and the explanation and scoring methods were modified. In the  
324 second round of Delphi, all question items of the 43 ICF category were reached to a  
325 consensus of 'Appropriate' and 'Agreement'.

326 The purpose of this study was to develop an assessment method that could be used  
327 not only by cardiovascular physicians but also by medical professionals: home  
328 physicians, care managers, and paramedical professions. Therefore, we adopted a  
329 simple evaluation method that requires as little special machinery and environment as  
330 possible. For example, although exercise tolerance at b455 has been reported to be a  
331 prognostic factor for HF [49], we avoided the cardiopulmonary exercise testing (CPX)  
332 and 6-minute walk test, and the specific activity scale (SAS) was chosen instead. [50-  
333 54] We selected gait speed and FIM as the existing assessment batteries linked to the  
334 d450 walking, but we selected only FIM for simplicity and ease of assessment at the  
335 suggestion of the panel members in the second Delphi round. The ICF categories in this  
336 study did not include renal function, BNP or anaemia, which are prognostic factors for  
337 heart failure.[55] We suggest that these items be added, although the increase in the  
338 items may prevent their wide-spread use in the clinical setting, making their clinical use  
339 more difficult. In addition, the comprehensive ICF-based assessment of older patients  
340 with HF developed in this study did not include personal factors such as age, gender,  
341 values, lifestyle, coping strategies and personality.

342 In recent years, patient-centred interventions have become a principle in the care of  
343 chronic diseases [56]. The ESC guidelines similarly recommend patient-centred care

14

1  
2  
3  
4  
5  
6 344 [57].

7 345 We propose that when using the ICF to share information on older people with HF across  
8 346 multiple professions, it is necessary to include not only the 43 ICF categories, but also  
9 347 personal factors.

10 348 In Japan, the establishment of a comprehensive community care system that integrates  
11 349 medical care, welfare, and nursing care is being promoted, but evidence for information  
12 350 sharing is lacking. We expect that the ICF-based assessment method for older patients  
13 351 with HF developed in this study will be widely used in clinical practice.

14 352

### 15 353 **Strengths and limitations**

16 354 Since the purpose of this study was to develop a common community-based evaluation  
17 355 method for medical and nursing care, we constructed an expert panel related to medical  
18 356 professions and nursing care professions in Hiroshima prefecture. Since there is no  
19 357 variation in the regions of the panel members, the existence of selective bias cannot be  
20 358 denied. Therefore, we suggest that the results of this study should be used with caution  
21 359 in regions other than Hiroshima prefecture. This study was based on the RAND/UCLS  
22 360 Delphi method, but face-to-face meetings could not be conducted because of the current  
23 361 coronavirus pandemic. Therefore, the implementation is not strictly based on the  
24 362 RAND/UCLS method. We believe that we should have held an online meeting during the  
25 363 Delphi Round 2. In this study, the Delphi method through expert consensus was used to  
26 364 clarify the appropriateness of the evaluation method. The shortcomings of the Delphi  
27 365 method are the possibility of coercion and inducement to gather opinions and the issue  
28 366 of the validity of the questionnaire. In the future, it will be necessary to clarify the validity  
29 367 of the evaluation method in survey studies of older patients with heart failure.

30 368

### 31 369 **Implications and Future directions**

32 370 The results of this study have two implications. First, it is the establishment of a  
33 371 comprehensive assessment method for older patients with HF, which is a social problem  
34 372 in Japan. Comprehensive multidisciplinary assessment is important to prevent  
35 373 rehospitalization for HF, and the ICF-based scoring method developed in this study is  
36 374 expected to prevent rehospitalization. Second, the ICF-based evaluation method allows  
37 375 for an international comparison of the effectiveness of HF treatment and information  
38 376 sharing. Wagner proposes a patient-centred model for chronic disease care that utilises  
39 377 local social resources and information sharing systems such as information and  
40 378 communication technology (ICT). [58,59] In the future, it is necessary to establish an  
41 379 information sharing system using a comprehensive assessment method based on the

1  
2  
3  
4  
5  
6 380 ICF, and to examine the effect of readmission prevention and differences in life function  
7 381 according to local policies.  
8  
9 382  
10 383

## 11 384 **CONCLUSION**

12  
13 385 We developed a scoring method based on the ICF for older patients with HF and  
14 386 clarified its appropriateness using the RAND/UCLA Delphi method. Future work is  
15 387 required to develop an ICF-based information sharing system and to clarify its impact on  
16 388 the prevention of re-hospitalisation and quality of life in older patients with HF.  
17  
18  
19 389

## 20 390 **Acknowledgements**

21  
22 391 For their contribution to the development of the ICF-based comprehensive assessment  
23 392 for older patients with heart failure, the team would like to acknowledge Dr. Etsushi  
24 393 Akimoto, Dr. Satoshi Ishida, Dr. Futoshi Konishi, Dr. Hideki Nojima, MS Keiko Ishii, MS  
25 394 Kaoru Okazaki, MS Mayumi Ono, MS Eiko Kishikawa, MS Emi Ochibe, MS Shizue  
26 395 Kobayasi, MS Kaori Tikashita, MS Yasue Saitou, MR Hiroshi Sakurashita, MR  
27 396 Nobuyoshi Satou, MS Misuzu Sakai, MR Takayuki Santa, MS Hiromi Shigeoka, MS Yoko  
28 397 Nakasa, MR Tomoaki Honma, MS Kazue Mitinori, MS Midori Motohiro and MS Norie  
29 398 Yoshimoto. This study was conducted as a part of the Hiroshima Heart Health Promotion  
30 399 Project. We would like to thank Editage ([www.editage.com](http://www.editage.com)) for English language editing.  
31  
32  
33  
34  
35  
36 400

## 37 401 **Contributions**

38 402 All authors meet the criteria for authorship of the ICMJE. SS, TK, TH and HK  
39 403 contributed to the conceptualisation of the study. SS, NG, HF, SN, YT, NM, KK, MN  
40 404 and MY were responsible for designing the questionnaire and collecting and analysing  
41 405 the data. MN, MY, MM, HO and YY were responsible for recruiting the study  
42 406 participants. YN, YK and HK were responsible for interpreting the results and managing  
43 407 the project. SS and HK supervised all research activities. All authors reviewed the  
44 408 current draft and approved the final current submission.  
45  
46  
47  
48  
49 409

## 50 410 **Funding**

51  
52 411 This work was supported by the MHLW Comprehensive Research on Statistical  
53 412 Information Program, Grant Number JPMH20AB1002.  
54  
55 413

## 56 414 **Competing interests**

57  
58 415 The authors declare that there are no conflicts of interest regarding the publication of  
59  
60

1  
2  
3  
4  
5  
6 416 this paper.

7 417

8  
9 **418 Ethics approval**

10 419 The study was approved by the Hiroshima University of Epidemiological Research  
11  
12 420 Ethics Review Board (approval number: E-2217).

13 421

14  
15 **422 Provenance and peer review**

16 423 Not commissioned; externally peer reviewed.

17 424

18  
19 **425 Data availability statement**

20 426 Data are available upon reasonable request.

21 427

22  
23  
24 **428 Open access**

25 429 This is an open access article distributed in accordance with the Creative Commons  
26  
27 430 Attribution Non-Commercial (CC BY-NC 4.0) licence, which permits others to distribute,  
28  
29 431 remix, adapt, build upon this work non-commercially, and licence their derivative works  
30  
31 432 on different terms, provided the original work is properly cited, appropriate credit is given,  
32  
33 433 any changes made indicated, and the use is non-commercial.  
34  
35 434 See <http://creativecommons.org/licenses/by-nc/4.0/>.

36 435

37  
38 **436 ORCID iD**

39 437 Shigehito Shota <https://orcid.org/0000-0001-7186-2327>

40 438

41 439

42 440  
43  
44  
45  
46  
47  
48  
49  
50  
51  
52  
53  
54  
55  
56  
57  
58  
59  
60



441 **References**

- 442 1 Ministry of Health Labour and Welfare. Vital statistics of JAPAN.  
443 <https://www.mhlw.go.jp/toukei/saikin/hw/jinkou/houkoku18/dl/all.pdf> (Accessed 19 Oct  
444 2021) 2018 [in Japanese].
- 445 2 Ministry of Health Labour and Welfare. *Comprehensive survey of living*  
446 *Conditions 2019*. [in Japanese].  
447 <https://www.mhlw.go.jp/toukei/saikin/hw/k-tyosa/k-tyosa19/dl/14.pdf>. Accessed 19  
448 October 2021.
- 449 3 Ministry of Health Labour and Welfare. Estimates of national medical care  
450 Expenditure 2017. [in Japanese]. [https://www.mhlw.go.jp/toukei/saikin/hw/k-](https://www.mhlw.go.jp/toukei/saikin/hw/k-iryohi/17/dl/data.pdf)  
451 [iryohi/17/dl/data.pdf](https://www.mhlw.go.jp/toukei/saikin/hw/k-iryohi/17/dl/data.pdf) (Accessed 19 Oct 2021).
- 452 4 Ministry of Health Labour and Welfare, Japan. *The Japanese national plan for*  
453 *promotion of measures against cerebrovascular and cardiovascular disease* [in  
454 Japanese] published 2020.
- 455 5 Kuwabara M, Mori M, Komoto S. Japanese national plan for promotion of  
456 measures against cerebrovascular and cardiovascular disease. *Circulation*  
457 2021;**143**:1929–31. doi: [10.1161/CIRCULATIONAHA.120.052737](https://doi.org/10.1161/CIRCULATIONAHA.120.052737). (Epub 17 May 2021).
- 458 6 Okura Y, Ramadan MM, Ohno Y, et al. Impending epidemic: future projection  
459 of heart failure in Japan to the year 2055. *Circ J* 2008;**72**:489–91.  
460 <https://doi.org/10.1253/circj.72.489>.
- 461 7 Yasuda S, Miyamoto Y, Ogawa H. Current status of cardiovascular medicine  
462 in the aging society of Japan. *Circulation* 2018;**138**:965–7.  
463 <https://doi.org/10.1161/CIRCULATIONAHA.118.035858>.
- 464 8 Nieminen MS, Dickstein K, Fonseca C, et al. The patient perspective: quality of  
465 life in advanced heart failure with frequent hospitalisations. *Int J Cardiol* 2015;**191**:256–  
466 64. doi: [10.1016/j.ijcard.2015.04.235](https://doi.org/10.1016/j.ijcard.2015.04.235).
- 467 9 Lewis EF, Claggett BL, McMurray JJV et al. Health-related quality of life  
468 outcomes in PARADIGM-HF. *Circ Heart Fail* 2017;**10**:e003430. doi:  
469 [10.1161/CIRCHEARTFAILURE.116.003430](https://doi.org/10.1161/CIRCHEARTFAILURE.116.003430).
- 470 10 Lee H, Oh SH, Cho H et al. Prevalence and socio-economic burden of heart  
471 failure in an aging society of South Korea. *BMC Cardiovasc Disord* 2016;**16**:215. doi:  
472 [10.1186/s12872-016-0404-2](https://doi.org/10.1186/s12872-016-0404-2).
- 473 11 Tsuchihashi M, Tsutsui H, Kodama K et al. Medical and socioenvironmental  
474 predictors of hospital readmission in patients with congestive heart failure. *Am Heart J*  
475 2001;**142**:E7.
- 476 12 Hernandez AF, Hammill BG, O'Connor CM et al. Clinical effectiveness of beta-

- 1  
2  
3  
4  
5  
6 477 blockers in heart failure: findings from the OPTIMIZE-HF (Organized Program to Initiate  
7 478 Lifesaving Treatment in Hospitalized Patients with Heart Failure) Registry. *J Am Coll*  
8 479 *Cardiol* 2009;**53**:184–92.
- 10 480 13 Benjamin EJ, Muntner P, Alonso A et al. UpdateHeart Disease and Stroke  
11 481 Statistics-2019 Update: A Report from the American Heart Association. *Circulation*  
12 482 2019;**139**:e56–e528.
- 14 483 14 Huynh QL, Negishi K, Blizzard L, et al. “Mild cognitive impairment predicts death  
15 484 and readmission within 30 days of discharge for heart failure.” *Int J Cardiol*  
16 485 2016;**221**:212–7.
- 18 486 15 O’Connor CM, Hasselblad V, Mehta RH, et al. “Triage after hospitalization with  
19 487 advanced heart failure: the ESCAPE (Evaluation Study of Congestive Heart Failure and  
20 488 Pulmonary Artery Catheterization Effectiveness) risk model and discharge score.” *J Am*  
21 489 *Coll Cardiol* 2010, Mar 2;**55**:872–8.
- 23 490 16 Lo AX, Donnelly JP, McGwin G Jr, et al. “Impact of gait speed and instrumental  
24 491 activities of daily living on all-cause mortality in adults ≥65 years with heart failure.” *Am*  
25 492 *J Cardiol* Mar 15 2015;**115**:797–801.
- 27 493 17 Takabayashi K, Kitaguchi S, Iwatsu K, et al. “A decline in activities of daily living  
28 494 due to acute heart failure is an independent risk factor of hospitalization for heart failure  
29 495 and mortality.” *J Cardiol* 2019;**73**:522–9.
- 31 496 18 Löfvenmark C, Mattiasson AC, Billing E et al. “Perceived loneliness and social  
32 497 support in patients with chronic heart failure.” *Eur J Cardiovasc Nurs* 2009;**8**:251–8.
- 34 498 19 Tsutsui H, Ide T, Ito H; et al. JCS/JHFS 2021 guideline focused update on  
35 499 diagnosis and treatment of acute and chronic heart failure. *Circ J* 2021.  
36 500 doi:[10.1253/circj.CJ-21-0431](https://doi.org/10.1253/circj.CJ-21-0431).
- 38 501 20 Sokoreli I, Cleland JG, Pauws SC, et al. Added value of frailty and social support  
39 502 in predicting risk of 30-day unplanned re-admission or death for patients with heart  
40 503 failure: an analysis from OPERA-HF. *Int J Cardiol* 2019;**278**:167–72.  
41 504 <https://doi.org/10.1016/j.ijcard.2018.12.030>.
- 43 505 21 Bradley EH, Curry L, Horwitz LI, et al. Hospital strategies associated with 30-  
44 506 day readmission rates for patients with heart failure. *Circ Cardiovasc Qual Outcomes*  
45 507 2013;**6**:444–50.
- 47 508 22 Japan Heart Failure Society Guidelines Committee. Statement on the  
48 509 treatment of elderly heart failure patients.  
49 510 [http://www.asas.or.jp/jhfs/pdf/Statement\\_HeartFailurel.pdf](http://www.asas.or.jp/jhfs/pdf/Statement_HeartFailurel.pdf) (Accessed 19 Nov 2021)  
50 511 2016.
- 52 512 23 World Health Organization. *ICF International classification of functioning,*

- 1  
2  
3  
4  
5  
6 513 *disability and health*. Geneva: WHO. 2001.
- 7 514 24 Maribo T, Petersen KS, Handberg C, et al. Systematic literature review on ICF from  
8 515 2001 to 2013 in the Nordic countries focusing on clinical and rehabilitation context. *J Clin*  
9 516 *Med Res* 2016;**8**:1–9.
- 11 517 25 Okochi J, Utsunomiya S, Takahashi T. Health measurement using the ICF: Test-  
12 518 retest reliability study of ICF codes and qualifiers in geriatric care. *Health Qual Life*  
13 519 *Outcomes* 2005; 3: 46.
- 16 520 26 Uhlig T, Lillemo S, Moe RH, et al. Reliability of the ICF Core Set for rheumatoid  
17 521 arthritis. *Ann Rheum Dis* 2007; 66: 1078–84.
- 19 522 27 Starrost K, Geyh S, Trautwein A, et al. Interrater reliability of the extended ICF Core  
20 523 Set for stroke applied by physiotherapists. *Phys Ther* 2008, 88: 841–51.
- 22 524 28 Hilfiker R, Orbist S, Christen G, et al. The use of the comprehensive International  
23 525 Classification of Functioning, Disability and Health Core Set for low back pain in clinical  
24 526 practice: a reliability study. *Physiother Res Int* 2009; 14: 147–66
- 26 527 29 Selb M, Escorpizo R, Kostanjsek N, et al. A guide on how to develop an  
27 528 International Classification of Functioning, Disability and Health Core Set. *Eur J Phys*  
28 529 *Rehabil Med* 2015 Feb;**51**(1):105-17.
- 31 530 30 Cieza A, Geyh S, Chatterji S, et al. ICF linking rules: an update based on lessons  
32 531 learned. *J Rehabil Med* 2005 Jul;**37**:212–8. doi: [10.1080/16501970510040263](https://doi.org/10.1080/16501970510040263).
- 34 532 31 Cieza A, Fayed N, Bickenbach J, et al. Refinements of the ICF Linking Rules to  
35 533 strengthen their potential for establishing comparability of health information. *Disabil*  
36 534 *Rehabil* 2019 Mar;**41**:574–83. doi: [10.3109/09638288.2016.1145258](https://doi.org/10.3109/09638288.2016.1145258). (Epub 17 Mar  
37 535 2016).
- 40 536 32 Cieza A, Stucki A, Geyh S, et al. ICF Core Sets for chronic ischaemic heart disease.  
41 537 *J Rehabil Med* 2004 Jul;**(44** Suppl):94-9. doi: [10.1080/16501960410016785](https://doi.org/10.1080/16501960410016785).
- 43 538 33 Sophie L W Spoorenberg SLW, Reijneveld SA, Middel B, et al. The Geriatric ICF  
44 539 Core Set reflecting health-related problems in community-living older adults aged 75  
45 540 years and older without dementia: development and validation. *Disabil Rehabil*  
46 541 2015;**37**(25):2337–43. doi: [10.3109/09638288.2015.1024337](https://doi.org/10.3109/09638288.2015.1024337).
- 49 542 34 Shiota S, Naka M, Kitagawa T, et al. Selection of comprehensive assessment  
50 543 categories based on the international classification of functioning, disability, and health  
51 544 for elderly patients with heart failure: A Delphi survey among registered instructors of  
52 545 cardiac rehabilitation. *Occup Ther Int* 2021 Jun 25;**2021**:6666203. doi:  
53 546 [10.1155/2021/6666203](https://doi.org/10.1155/2021/6666203). eCollection 2021.
- 56 547 35 Shiota S, Kitagawa T, Hidaka T, et al. The international classification of  
57 548 functioning, disabilities, and health categories necessary for care planning for older

- 1  
2  
3  
4  
5  
6 549 patients with heart failure: A survey of care managers in Japan. *BMC Geriatr*. 2021 Dec  
7 550 15;21(1):704. doi: 10.1186/s12877-021-02647-3.
- 8  
9 551 36 Fitch K, Bernstein SJ, Aguilar MD, et al. The Rand/UCLA appropriateness method  
10 552 user's manual. Santa Monica: RAND 2001.
- 11  
12 553 37 Toshiro K, Takayuki H, Makiko N, et al. Current medical and social issues for  
13 554 hospitalized heart failure patients in Japan and factors for improving their outcomes -  
14 555 insights from the REAL-HF registry. *Circ Rep*. 2020 Mar;14:226–34. doi:  
15 556 [10.1253/circrep.CR-20-0011](https://doi.org/10.1253/circrep.CR-20-0011).
- 16  
17 557 38 Mukaino M, Proding B, Yamada S, et al. Supporting the clinical use of the ICF  
18 558 in Japan - development of the Japanese version of the simple, intuitive descriptions for  
19 559 the ICF Generic-30 set, its operationalization through a rating reference guide, and  
20 560 interrater reliability study. *BMC Health Serv Res* 2020 Jan 30;20:66. doi:  
21 561 [10.1186/s12913-020-4911-6](https://doi.org/10.1186/s12913-020-4911-6).
- 22  
23 562 39 Senju Y, Mukaino M, Proding B, et al. Development of a clinical tool for rating  
24 563 the body function categories of the ICF generic-30/rehabilitation set in Japanese  
25 564 rehabilitation practice and examination of its interrater reliability. *BMC Med Res Methodol*  
26 565 2021 Jun 14;21:121. doi: [10.1186/s12874-021-01302-0](https://doi.org/10.1186/s12874-021-01302-0).
- 27  
28 566 40 Proding B, O'Connor RJ, Stucki G et al. Establishing score equivalence of the  
29 567 Functional Independence Measure motor scale and the Barthel index, utilising the  
30 568 International Classification of Functioning, Disability and Health and Rasch  
31 569 measurement theory. *J Rehabil Med* 2017 May 16;49:416–22. doi: [10.2340/16501977-](https://doi.org/10.2340/16501977-2225)  
32 570 [2225](https://doi.org/10.2340/16501977-2225).
- 33  
34 571 41 Bladh S, Nilsson MH, Carlsson G et al. Content analysis of 4 fear of falling  
35 572 rating scales by linking to the international classification of functioning, disability and  
36 573 health. *PM&R* 2013 Jul;5:573–582.e1. doi: [10.1016/j.pmrj.2013.01.006](https://doi.org/10.1016/j.pmrj.2013.01.006).
- 37  
38 574 42 Milman N, Annelies Boonen, Peter A Merkel. et al. Mapping of the outcome  
39 575 measures in rheumatology core set for antineutrophil cytoplasmic antibody-associated  
40 576 vasculitis to the International Classification of Function, Disability and Health. *Arthritis*  
41 577 *Care Res (Hoboken)*. 2015 Feb;67:255–63. doi: 10.1002/acr.22414. PMID: 25048363.
- 42  
43 578 43 Hoang-Kim A, Schemitsch E, Abhaya V. Methodological challenges in the use  
44 579 of hip-specific composite outcomes: linking measurements from hip fracture trials to the  
45 580 International Classification of Functioning, Disability and Health Framework. *Arch Orthop*  
46 581 *Trauma Surg* 2014;134:219–28. DOI [10.1007/s00402-013-1824-4](https://doi.org/10.1007/s00402-013-1824-4)
- 47  
48 582 44 Cieza A, Stucki G. Content comparison of health-related quality of life (HRQOL)  
49 583 instruments based on the international classification of functioning, disability and health  
50 584 (ICF). *Qual Life Res* 2005 Jun;14:1225–37. doi: [10.1007/s11136-004-4773-0](https://doi.org/10.1007/s11136-004-4773-0).

- 1  
2  
3  
4  
5  
6 585 45 Cieza A, Hilfiker R, Boonen A, et al. Items from patient-oriented instruments can  
7 586 be integrated into interval scales to operationalize categories of the International  
8 587 Classification of Functioning, Disability and Health. *J Clin Epidemiol* 2009 Sep;62(9):912-  
9 588 21, 921.e1-3. doi: 10.1016/j.jclinepi.2008.04.011.
- 10  
11 589 46 Darzins SW, Imms C, Di Stefano M. Measurement of activity limitations and  
12 590 participation restrictions: examination of ICF-linked content and scale properties of the  
13 591 FIM and PC-PART instruments. *Disabil Rehabil* 2017 May;39:1025–38. doi:  
14 592 [10.3109/09638288.2016.1172670](https://doi.org/10.3109/09638288.2016.1172670). (Epub 20 May 2016).
- 15  
16 593 47 Prodinge B, Stucki G, Coenen M. et al. The measurement of functioning using  
17 594 the International Classification of Functioning, Disability and Health: comparing qualifier  
18 595 ratings with existing health status instruments. *Disabil Rehabil* 2019 Mar;41:541–8. doi:  
19 596 [10.1080/09638288.2017.1381186](https://doi.org/10.1080/09638288.2017.1381186). (Epub 8 Oct 2017).
- 20  
21 597 48 Giardini A, Vitacca M, Pedretti R. et al. Linking the ICF codes to clinical real-  
22 598 life assessments: the challenge of the transition from theory to practice. *G Ital Med Lav*  
23 599 *Ergon* 2019 May;41:78–104. PMID: [31170337](https://pubmed.ncbi.nlm.nih.gov/31170337/) [in Italian].
- 24  
25 600 49 JCS/JACR. Guideline on rehabilitation in patients with cardiovascular disease.  
26 601 [https://www.j-circ.or.jp/cms/wp-content/uploads/2021/03/JCS2021\\_Makita.pdf](https://www.j-circ.or.jp/cms/wp-content/uploads/2021/03/JCS2021_Makita.pdf)  
27 602 (Accessed 19 Nov 2021) 2021.
- 28  
29 603 50 Mancini DM, Eisen H, Kussmaul W, et al. Value of peak exercise oxygen  
30 604 consumption for optimal timing of cardiac transplantation in ambulatory patients with  
31 605 heart failure. *Circulation* 1991;83:778–86.
- 32  
33 606 51 Keteyian SJ, Patel M, Kraus WE, et al. Variables measured during  
34 607 cardiopulmonary exercise testing as predictors of mortality in chronic systolic heart  
35 608 failure. *J Am Coll Cardiol* 2016;67:780–9. PMID: [26892413](https://pubmed.ncbi.nlm.nih.gov/26892413/).
- 36  
37 609 52 Nakanishi M, Takaki H, Kumasaka R, et al. Targeting of high peak respiratory  
38 610 exchange ratio is safe and enhances the prognostic power of peak oxygen uptake for  
39 611 heart failure patients. *Circ J* 2014 Aug 25;78:2268–75. doi: [10.1253/circj.cj-14-0047](https://doi.org/10.1253/circj.cj-14-0047),  
40 612 PMID: [25056425](https://pubmed.ncbi.nlm.nih.gov/25056425/).
- 41  
42 613 53 ATS Committee on Proficiency Standards for Clinical Pulmonary Function  
43 614 Laboratories. ATS statement: guidelines for the six-minute walk test. *Am J Respir Crit*  
44 615 *Care Med* 2002;166:111–7. PMID: [12091180](https://pubmed.ncbi.nlm.nih.gov/12091180/).
- 45  
46 616 54 Goldman L, Hashimoto B, Cook EF, et al. Comparative reproducibility and  
47 617 validity of systems for assessing cardiovascular functional class: advantages of a new  
48 618 specific activity scale. *Circulation* 1981;64:1227–34. PMID: [7296795](https://pubmed.ncbi.nlm.nih.gov/7296795/).

- 1  
2  
3  
4  
5  
6 619 55 Guidelines for diagnosis and treatment of acute and chronic heart failure  
7 620 (JCS 2017/JHFS 2017) . [https://www.mhlw.go.jp/file/05-Shingikai-10901000-](https://www.mhlw.go.jp/file/05-Shingikai-10901000-Kenkoukyoku-Soumuka/0000202651.pdf)  
8 621 [Kenkoukyoku-Soumuka/0000202651.pdf](https://www.mhlw.go.jp/file/05-Shingikai-10901000-Kenkoukyoku-Soumuka/0000202651.pdf) (Accessed 19 Nov 2021) 2018.  
9  
10 622 56 Wagner EH, Bennett SM, Austin BT et al. Finding common ground: patient-  
11 623 centeredness and evidence-based chronic illness care. *J Altern Complement Med*  
12 624 2005;**11**;Supplement 1:S7–SS15. doi: [10.1089/acm.2005.11.s-7](https://doi.org/10.1089/acm.2005.11.s-7).  
13  
14 625 57 McDonagh TA, Metra M, Adamo M et al. 2021 ESC Guidelines for the  
15 626 diagnosis and treatment of acute and chronic heart failure. *Eur Heart J* 2021;**42**:3599–  
16 627 726. doi: [10.1093/eurheartj/ehab368](https://doi.org/10.1093/eurheartj/ehab368).  
17  
18 628 58 Wagner EH. More than a case manager. *Ann Intern Med* 1998;**129**:654–6.  
19  
20 629 59 Wagner EH, Austin BT, Davis C et al. Improving chronic illness care:  
21 630 translating evidence into action. *Health Aff (Millwood)* 2001;**20**:64–78.  
22  
23 631  
24  
25  
26  
27  
28  
29  
30  
31  
32  
33  
34  
35  
36  
37  
38  
39  
40  
41  
42  
43  
44  
45  
46  
47  
48  
49  
50  
51  
52  
53  
54  
55  
56  
57  
58  
59  
60

1  
2  
3  
4  
5  
6 632 **Figure Legends**  
7

8 633 Fig. 1: Development of Questionnaire and Delphi process flow  
9

10 634  
11

12  
13 635 Fig. 2: Selection of records and process flow diagrams  
14

15  
16 636  
17  
18  
19  
20  
21  
22  
23  
24  
25  
26  
27  
28  
29  
30  
31  
32  
33  
34  
35  
36  
37  
38  
39  
40  
41  
42  
43  
44  
45  
46  
47  
48  
49  
50  
51  
52  
53  
54  
55  
56  
57  
58  
59  
60

For peer review only

### Development of the questionnaire

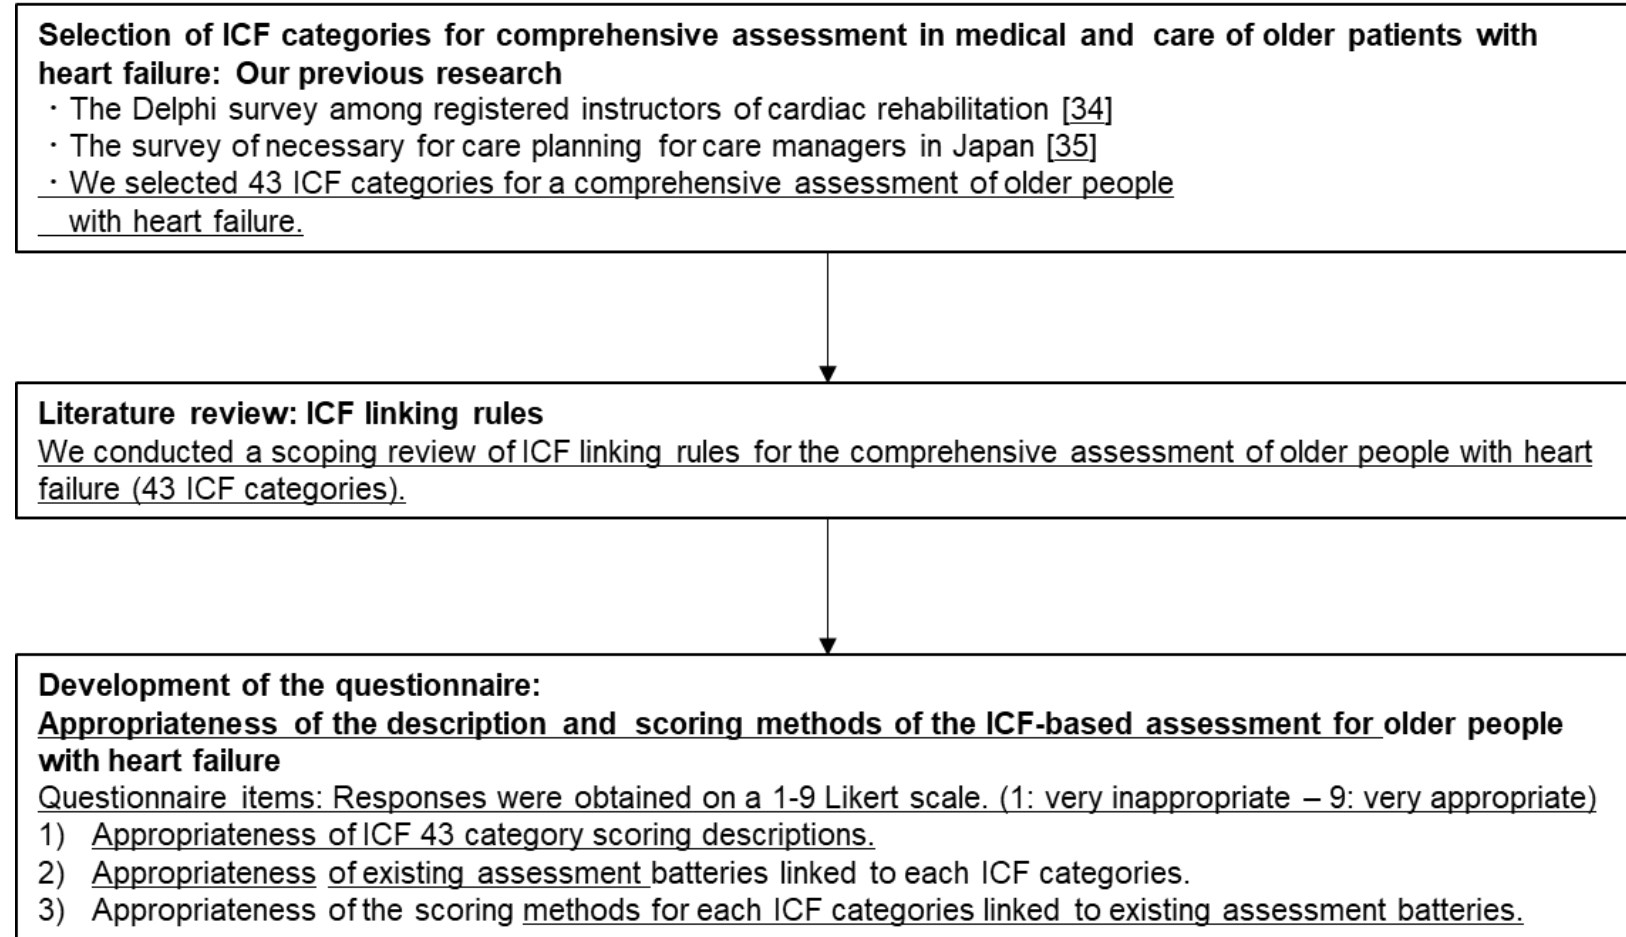

### Delphi approach

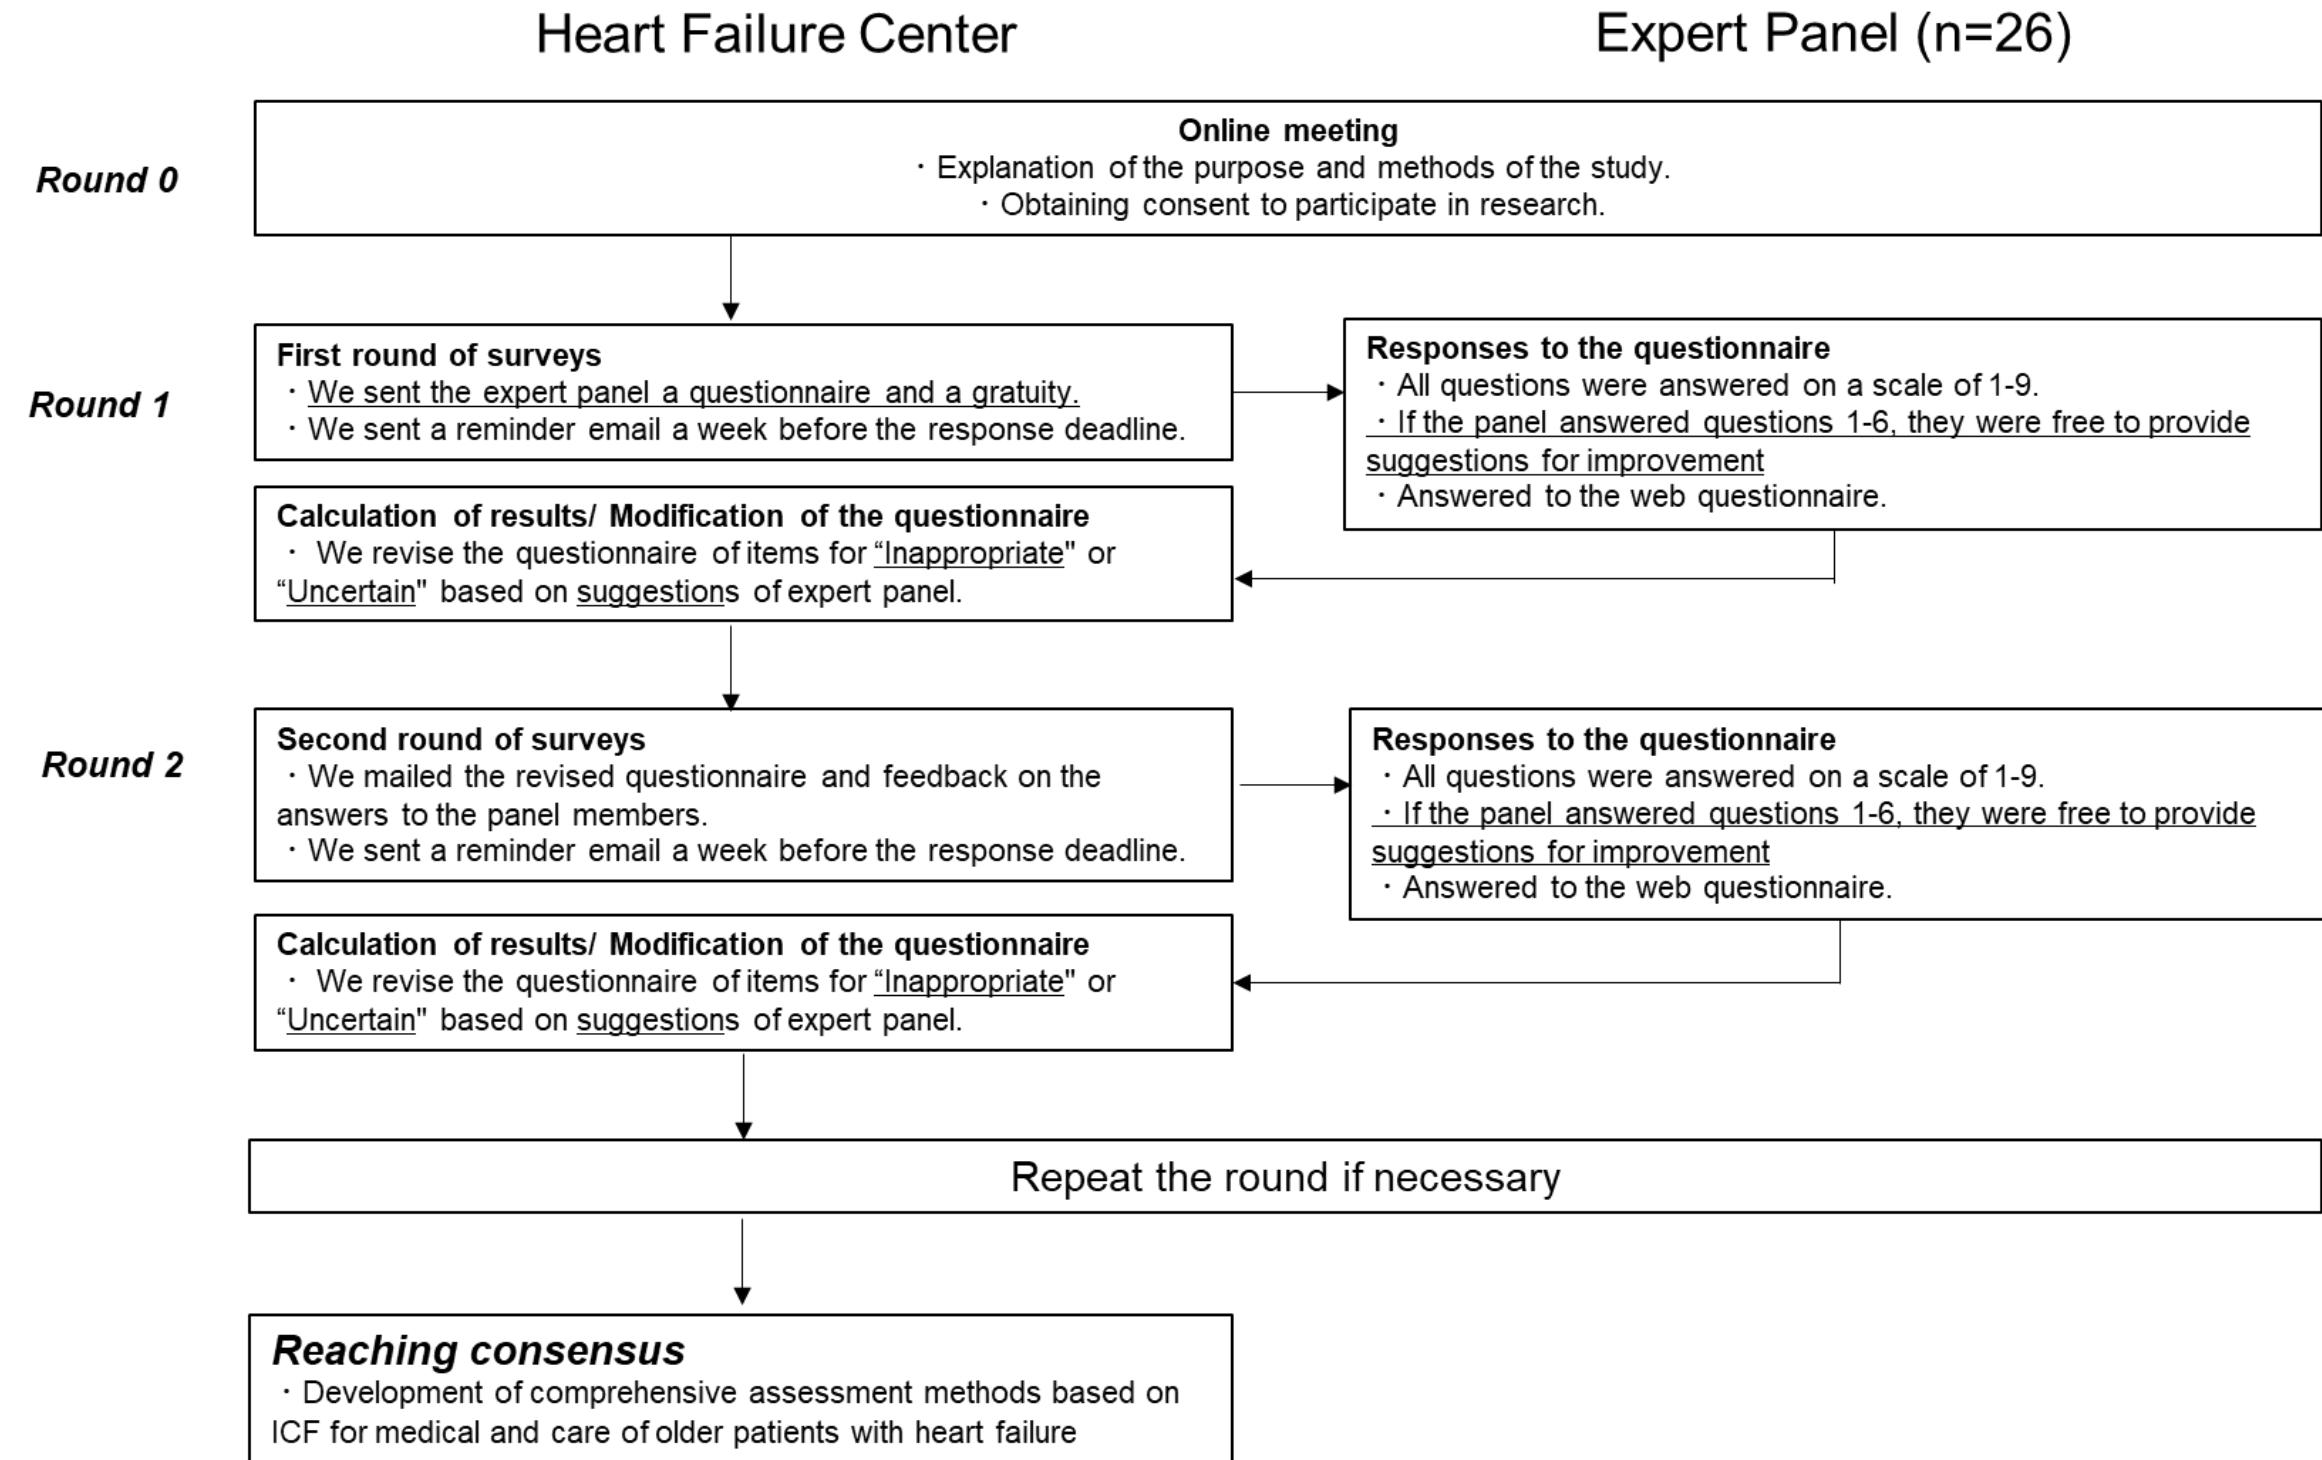



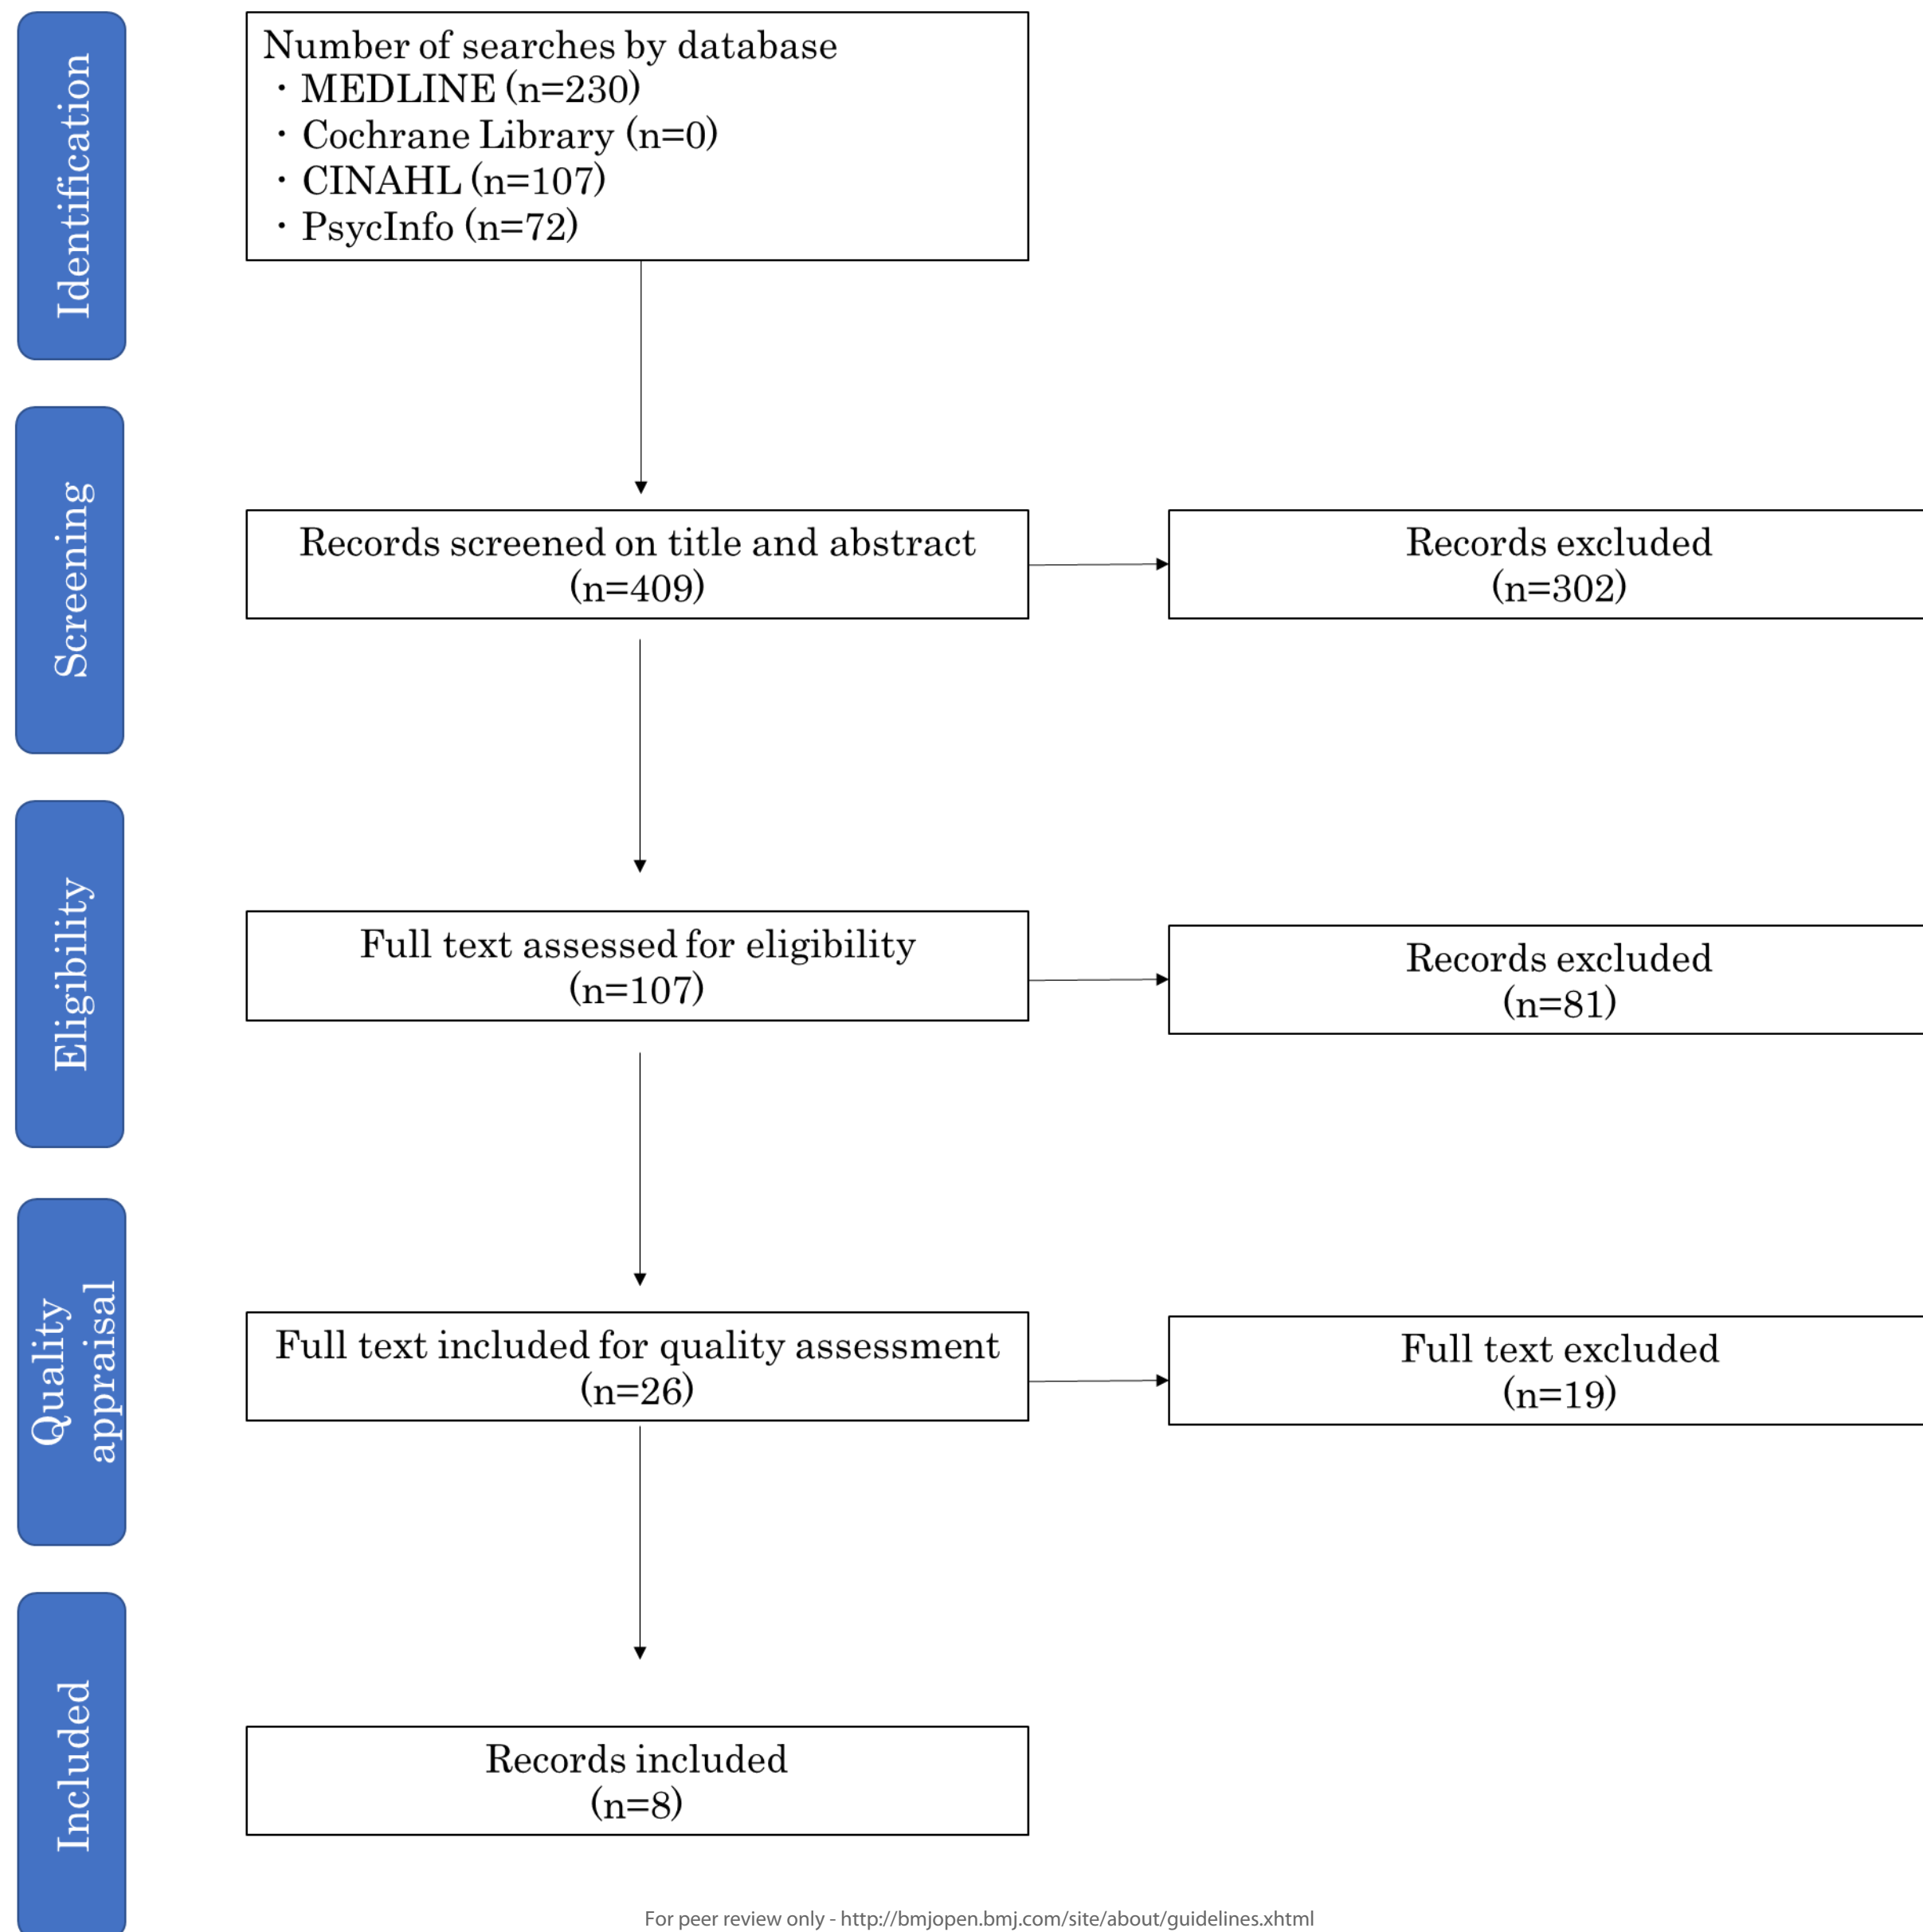

## Supplemental materials 1

### Questionnaire

**“For each ICF category, please indicate on a scale of 1 (very inappropriate) to 9 (very appropriate) the appropriateness of the following three questions.**

**(1-3: not appropriate, 4-6: undecided, 7-9: appropriate)”**

#### Questionnaire items

- 1) Appropriateness of ICF 43 category scoring descriptions.
- 2) Appropriateness of existing assessment batteries linked to each ICF categories.
- 3) Appropriateness of the scoring methods for each ICF categories linked to existing assessment.

**b110: Consciousness function**

General mental functions of the state of awareness and alertness, including the clarity and continuity of the wakeful state.

*Inclusions: functions of the state, continuity, and quality of consciousness; loss of consciousness; coma, vegetative states, fugues, trance states, possession states, drug-induced altered consciousness, delirium, stupor*

*Exclusions: orientation functions ([b114](#)); energy and drive functions ([b130](#)); sleep functions ([b134](#))*

**1) Appropriateness of b110: consciousness function scoring descriptions.****Ratings**

0 No problem

1 Mild problem: May include problems with consciousness functions that do not affect the patient's daily activities.

2 Moderate problem: May include a problem with consciousness functions that exceeds 1, but remains a relatively minor problem (<50%).

3 Severe problem: May include a major problem ( $\geq 50\%$ ) in consciousness functions.

4 Complete problem: May include a complete problem with consciousness functions, such as coma.

**Answer: Please tick the number that best applies**

| Very inappropriate |   |   |   |   |   |   |   |   | Very appropriate |  |
|--------------------|---|---|---|---|---|---|---|---|------------------|--|
| 1                  | 2 | 3 | 4 | 5 | 6 | 7 | 8 | 9 |                  |  |

**2) Appropriateness of existing assessment batteries linked to b110: consciousness function****Existing assessment battery linked to b110 consciousness function: Japan Coma Scale****Japan Coma Scale**

JCS0 (alert)

JCS I (not fully alert but awake without any stimuli)

1: Almost clear consciousness, but not clear.

2: Disorientation (not knowing places, times or dates)

3: Cannot say his/her name or date of birth

JCS II (arousable with stimulation)

1  
2  
3  
4  
5  
6 10: Easy eye-opening with a normal call.

7 20: Eyes open with loud voice or body shaking

8 30: Eyes open by repeated calls with pain stimulus.

9  
10 JCSIII(unarousable)

11 100: Movement to repel the pain stimulus.

12 200: Slight limb movement or frowning in response to the pain stimulus

13 300: Does not respond to pain stimulus

14  
15  
16 **[Reference]**

17 1. Ohta T, Waga S, Handa W, et al. New grading of level of disordered consciousness (author's  
18 transl). No shinkei geka. Neurol Surg 1974;2:623–7.

19 2. Ohta T, Kikuchi H, Hashi K, et al. Nizofenone administration in the acute stage following  
20 subarachnoid hemorrhage. Results of a multi-center controlled double-blind clinical study. J  
21 Neurosurg 1986;64:420–6.

22 3. Shigemori M, Abe T, Aruga T, et al. Guidelines for the Management of Severe Head Injury,  
23 2nd edition guidelines from the Guidelines Committee on the Management of Severe Head  
24 Injury, the Japan Society of Neurotraumatology. Neurol Med Chir 2012;52:1–30

25  
26  
27  
28  
29  
30  
31 **Answer: Please tick the number that best applies**

| Very inappropriate |   |   |   |   | Very appropriate |   |   |   |  |
|--------------------|---|---|---|---|------------------|---|---|---|--|
| 1                  | 2 | 3 | 4 | 5 | 6                | 7 | 8 | 9 |  |

32  
33  
34  
35  
36  
37 **3) Appropriateness of the scoring methods for b110 consciousness function linked to**  
38 **Japan Coma Scale.**

39  
40  
41 **Ratings**

42 0 No problem: JCS 0

43 1 Mild problem: JCS I -1 ~ JCS I -3

44 2 Moderate problem: JCS II -10 ~ JCS II -30

45 3 Severe problem: JCSIII-100 ~ JCSIII-200

46 4 Complete problem: JCSIII-300

47  
48  
49  
50  
51  
52 **Answer: Please tick the number that best applies**

| Very inappropriate |   |   |   |   | Very appropriate |   |   |   |  |
|--------------------|---|---|---|---|------------------|---|---|---|--|
| 1                  | 2 | 3 | 4 | 5 | 6                | 7 | 8 | 9 |  |

**b114: Orientation functions**

General mental functions of knowing and ascertaining one's relation to time, to place, to self, to others, to objects, and to space.

*Inclusions: functions of orientation to time, place and person; orientation to self and others; disorientation to time, place, and person*

*Exclusions: consciousness functions ([b110](#)); attention functions ([b140](#)); memory functions ([b144](#))*

**1) Appropriateness of b114: Orientation functions scoring descriptions.****Ratings**

0 No problem

1 Mild problem: May include problems with orientation functions that do not affect the patient's daily activities.

2 Moderate problem: May include a problem with orientation functions that exceeds 1, but remains a relatively minor problem (<50%).

3 Severe problem: May include a major problem ( $\geq 50\%$ ) in orientation functions.

4 Complete problem: May include a complete problem with orientation functions.

**Answer: Please tick the number that best applies**

| Very inappropriate |   |   |   |   | Very appropriate |   |   |   |  |
|--------------------|---|---|---|---|------------------|---|---|---|--|
| 1                  | 2 | 3 | 4 | 5 | 6                | 7 | 8 | 9 |  |

**2) Appropriateness of existing assessment batteries linked to b114: Orientation functions****Existing assessment battery linked to b114: Orientation functions: Mini-Mental State Examination****Mini-Mental State Examination**

Orientation: time

Year, Month, Day, Date, Time: \_\_\_/5

Orientation: place

Country, Town, District, Hospital, Ward: \_\_\_/5

**[Reference]**

1. Folstein MF, Folstein SE, McHugh PR. Mini-mental state. A practical method for grading the cognitive state of patients for the clinician. J. Psychiatry Res. 1975; 12: 189–198.

**Answer: Please tick the number that best applies**

| Very inappropriate |   |   |   |   | Very appropriate |   |   |   |
|--------------------|---|---|---|---|------------------|---|---|---|
| 1                  | 2 | 3 | 4 | 5 | 6                | 7 | 8 | 9 |

**3) Appropriateness of the scoring methods for b114: Orientation functions linked to Mini-Mental State Examination**

**Ratings**

- 0 No problem: MMSE; orientation score 5 (Adopt low scores of time or place)
- 1 Mild problem: MMSE; orientation score 4 (Adopt low scores of time or place)
- 2 Moderate problem: MMSE; orientation score 3 (Adopt low scores of time or place)
- 3 Severe problem: MMSE; orientation score 2 (Adopt low scores of time or place)
- 4 Complete problem: MMSE; orientation score 1-0 (Adopt low scores of time or place)

**Answer: Please tick the number that best applies**

| Very inappropriate |   |   |   |   | Very appropriate |   |   |   |
|--------------------|---|---|---|---|------------------|---|---|---|
| 1                  | 2 | 3 | 4 | 5 | 6                | 7 | 8 | 9 |

[Reference]

Vriendt PD, Gorus E, Bautmans I, et al. Conversion of the Mini-Mental State Examination to the International Classification of Functioning, Disability and Health terminology and scoring system. *Gerontology*. 2012;58(2):112-9. doi: 10.1159/000330088.

**b130 Energy and drive functions** (Mental functions that cause self-driven activities in daily life.)

General mental functions of physiological and psychological mechanisms that cause the individual to move towards satisfy specific needs and general goals in a persistent manner.

*Inclusions: functions of energy level, motivation, appetites, craving (including craving for substances that can be abused), and impulse control*

*Exclusions: consciousness functions ([b110](#)); temperament and personality functions ([b126](#)); sleep functions ([b134](#)); psychomotor functions ([b147](#)); emotional functions ([b152](#))*

### 1) Appropriateness of b130 Energy and drive functions.

#### Ratings

0 No problem

1 Mild problem: May include problems with energy and drive functions that do not affect the patient's daily activities.

2 Moderate problem: May include a problem with energy and drive functions that exceeds 1, but remains a relatively minor problem (<50%).

3 Severe problem: May include a major problem ( $\geq 50\%$ ) in energy and drive functions.

4 Complete problem: May include a complete problem with energy and drive functions, such as having no motivation or appetite any time.

**Answer: Please tick the number that best applies**

|                    |   |   |   |   |   |   |   |   |                  |  |
|--------------------|---|---|---|---|---|---|---|---|------------------|--|
| Very inappropriate |   |   |   |   |   |   |   |   | Very appropriate |  |
| 1                  | 2 | 3 | 4 | 5 | 6 | 7 | 8 | 9 |                  |  |

### 2) Appropriateness of existing assessment batteries linked to b130 Energy and drive functions

**Existing assessment battery linked to b130 Energy and drive functions: Vitality Index**

#### Vitality Index

|                                                                     |   |
|---------------------------------------------------------------------|---|
| 1. Wake up                                                          |   |
| Always waking up on time.                                           | 2 |
| Sometimes they don't wake up unless you wake them up.               | 1 |
| They never wake up on their own.                                    | 0 |
| 2. Communication                                                    |   |
| Greet and talk to them yourself.                                    | 2 |
| Responding to greetings and calls for help and smiles are observed. | 1 |

|                                                                                                     |     |
|-----------------------------------------------------------------------------------------------------|-----|
| No response.                                                                                        | 0   |
| <b>3. Feeding</b>                                                                                   |     |
| Willing to eat on their own initiative                                                              | 2   |
| Attempts to eat when prompted                                                                       | 1   |
| Lack of interest in eating, unwilling to eat at all                                                 | 0   |
| <b>4. On and Off Toilet</b>                                                                         |     |
| Always communicate bowel movements and urination on their own, or urinate and defecate on their own | 2   |
| Occasional urinary and bowel movements.                                                             | 1   |
| No interest in excretion at all.                                                                    | 0   |
| <b>5. Rehabilitation, Activity</b>                                                                  |     |
| Go to rehabilitation on their own and seek out activities.                                          | 2   |
| Participate in rehabilitation and activities when prompted                                          | 1   |
| Rejection, indifference.                                                                            | 0   |
| Total                                                                                               | /10 |

**[Reference]**

1. Kenji Toba, Ryuhei Nakai, Masahiro Akishita et al: Vitality Index as a useful tool to assess elderly with dementia. Geriatr Gerontol Int 2002; 2: 23-9.

**Answer: Please tick the number that best applies**

|                    |   |   |   |   |   |   |   |                  |
|--------------------|---|---|---|---|---|---|---|------------------|
| Very inappropriate |   |   |   |   |   |   |   | Very appropriate |
| 1                  | 2 | 3 | 4 | 5 | 6 | 7 | 8 | 9                |

**3) Appropriateness of the scoring methods for b130 Energy and drive functions linked to Vitality Index**

**Ratings**

0 No problem: Vitality Index; Total 10

1 Mild problem: Vitality Index; Total 9-7

2 Moderate problem: Vitality Index; Total 6-4

3 Severe problem: Vitality Index; Total 3-1

4 Complete problem: Vitality Index; Total 0

**Answer: Please tick the number that best applies**

|                    |   |   |   |   |   |   |   |                  |
|--------------------|---|---|---|---|---|---|---|------------------|
| Very inappropriate |   |   |   |   |   |   |   | Very appropriate |
| 1                  | 2 | 3 | 4 | 5 | 6 | 7 | 8 | 9                |



**b134 Sleep functions** (Extent and frequency of the problem, such as shortage of sleep or irregular sleep schedules)

General mental functions of periodic, reversible and selective physical and mental disengagement from one's immediate environment accompanied by characteristic physiological changes.

*Exclusions: Attention functions (b140), Consciousness functions (b110), Energy and drive functions (b130), Psychomotor functions (b147)*

### 1) Appropriateness of b134 Sleep functions.

#### Ratings

0 No problem

1 Mild problem: May include problems with sleep that do not affect the patient's daily activities.

2 Moderate problem: May include a problem with sleep that exceeds 1, but remains a relatively minor problem (<50%).

3 Severe problem: May include a major problem ( $\geq 50\%$ ) in sleep.

4 Complete problem: May include a complete problem with sleep, such as being incapable of sleeping, or a complete day–night reversal every day.

#### Answer: Please tick the number that best applies

|                    |   |   |   |   |   |   |   |   |                  |
|--------------------|---|---|---|---|---|---|---|---|------------------|
| Very inappropriate |   |   |   |   |   |   |   |   | Very appropriate |
| 1                  | 2 | 3 | 4 | 5 | 6 | 7 | 8 | 9 |                  |

### 2) Appropriateness of existing assessment batteries linked to b134 Sleep functions.

#### Existing assessment battery linked to b134 Sleep functions: Pittsburgh Sleep Quality Index

Prepared with reference to the Pittsburgh Sleep Quality Index.

|                                                                                                                                                                     |   |
|---------------------------------------------------------------------------------------------------------------------------------------------------------------------|---|
| <b>1. Amount of sleep: During the past month, how hours of actual sleep did you get at night? (This may be different than the number of hours you spent in bed)</b> |   |
| Over 7 hours                                                                                                                                                        | 0 |
| 6-7 hours                                                                                                                                                           | 1 |
| 5-6 hours                                                                                                                                                           | 2 |
| Less than 5 hours                                                                                                                                                   | 3 |
| <b>2. Onset of sleep: During the past month, how often have you had trouble sleeping because you cannot get to sleep within 30 minutes</b>                          |   |

|                                                                                                                                                                |   |
|----------------------------------------------------------------------------------------------------------------------------------------------------------------|---|
| Not during the past month                                                                                                                                      | 0 |
| Less than once a week                                                                                                                                          | 1 |
| Once or twice a week                                                                                                                                           | 2 |
| Three or more times a week                                                                                                                                     | 3 |
| <b>3. Maintenance of sleep: During the past month, how often have you had trouble sleeping because you wake up in the middle of the night or early morning</b> |   |
| Not during the past month                                                                                                                                      | 0 |
| Less than once a week                                                                                                                                          | 1 |
| Once or twice a week                                                                                                                                           | 2 |
| Three or more times a week                                                                                                                                     | 3 |
| <b>4. Quality of sleep: During the past month, how would you rate your sleep quality overall?</b>                                                              |   |
| Very good                                                                                                                                                      | 0 |
| Fairly good                                                                                                                                                    | 1 |
| Fairly bad                                                                                                                                                     | 2 |
| Very bad                                                                                                                                                       | 3 |

**[Reference]**

1. Buysse DJ, Reynolds CF, Charles F, et al (1989). The Pittsburgh sleep quality index: a new instrument for psychiatric practice and research. *Psychiatry Research*, 28 (2), 193–213.
2. Doi Y, Minowa M, Uchiyama M, et al. Psychometric assessment of subjective sleep quality using the Japanese version of the Pittsburgh Sleep Quality Index (PSQI-J) in psychiatric disordered and control subjects. *Psychiatry Res.* 2000 Dec 27;97(2-3):165-72. doi: 10.1016/s0165-1781(00)00232-8.

**Answer: Please tick the number that best applies**

|                    |   |   |   |   |   |   |   |   |                  |
|--------------------|---|---|---|---|---|---|---|---|------------------|
| Very inappropriate |   |   |   |   |   |   |   |   | Very appropriate |
| 1                  | 2 | 3 | 4 | 5 | 6 | 7 | 8 | 9 |                  |

**3) Appropriateness of the scoring methods for b134 Sleep functions linked to Pittsburgh Sleep Quality Index****Ratings**

0 No problem: All items scored 0.

1 Mild problem: Lowest item scores 1

1  
2  
3  
4  
5  
6  
7  
8  
9  
10  
11  
12  
13  
14  
15  
16  
17  
18  
19  
20  
21  
22  
23  
24  
25  
26  
27  
28  
29  
30  
31  
32  
33  
34  
35  
36  
37  
38  
39  
40  
41  
42  
43  
44  
45  
46  
47  
48  
49  
50  
51  
52  
53  
54  
55  
56  
57  
58  
59  
60

2 Moderate problem: Lowest item scores 2

3 Severe problem: Lowest item scores 3

4 Complete problem: Lowest item scores 1 and use of sleeping pills does not improve the problem

**Answer: Please tick the number that best applies**

| Very inappropriate |   |   |   |   |   |   |   |   | Very appropriate |  |
|--------------------|---|---|---|---|---|---|---|---|------------------|--|
| 1                  | 2 | 3 | 4 | 5 | 6 | 7 | 8 | 9 |                  |  |

For peer review only

## **b164 Higher-level cognitive functions**

Specific mental functions especially dependent on the frontal lobes of the brain, including complex goal-directed behaviours such as decision-making, abstract thinking, planning and carrying out plans, mental flexibility, and deciding which behaviours are appropriate under what circumstances; often called executive functions.

*Inclusions: categorization, concept formation, cognitive flexibility*

*Exclusions: Calculation functions (b172), Memory functions (b144), Mental functions of language (b167), Thought functions (b160)*

### **1) Appropriateness of b164 Higher-level cognitive functions.**

#### **Ratings**

0 No problem

1 Mild problem: May include problems with **higher-level cognitive functions** that do not affect the patient's daily activities.

2 Moderate problem: May include a problem with **higher-level cognitive functions** that exceeds 1, but remains a relatively minor problem (<50%).

3 Severe problem: May include a major problem ( $\geq 50\%$ ) in **higher-level cognitive functions**.

4 Complete problem: May include a complete problem with **higher-level cognitive functions**.

**Answer: Please tick the number that best applies**

| Very inappropriate |   |   |   |   |   | Very appropriate |   |   |
|--------------------|---|---|---|---|---|------------------|---|---|
| 1                  | 2 | 3 | 4 | 5 | 6 | 7                | 8 | 9 |

### **2) Appropriateness of existing assessment batteries linked to b164 Higher-level cognitive functions.**

#### **Existing assessment battery linked to b164 Higher-level cognitive functions: Frontal Assessment Battery**

Frontal Assessment Battery

#### **[Reference]**

1. Dubois B, Slachevsky A, Litvan I, et al. The FAB: a Frontal Assessment Battery at bedside. *Neurology*. 2000 Dec 12;55(11):1621-6. doi: 10.1212/wnl.55.11.1621.
2. Nakaaki S, Murata Y, Sato J, et al. Reliability and validity of the Japanese version of the

1  
2  
3  
4  
5  
6 Frontal Assessment Battery in patients with the frontal variant of frontotemporal dementia.  
7 Psychiatry Clin Neurosci. 2007 Feb;61(1):78-83. doi: 10.1111/j.1440-1819.2007.01614.x.  
8  
9

10 **Answer: Please tick the number that best applies**

|                    |   |   |   |   |                  |   |   |   |  |
|--------------------|---|---|---|---|------------------|---|---|---|--|
| Very inappropriate |   |   |   |   | Very appropriate |   |   |   |  |
| 1                  | 2 | 3 | 4 | 5 | 6                | 7 | 8 | 9 |  |

11  
12  
13  
14  
15  
16 **3) Appropriateness of the scoring methods for b164 Higher-level cognitive functions**  
17 **linked to Frontal Assessment Battery**  
18

19  
20  
21 **Ratings**

- 22 0 No problem: FAB Total scores 18-16  
23  
24 1 Mild problem: FAB Total scores 15-14  
25  
26 2 Moderate problem: FAB Total scores 13-9  
27  
28 3 Severe problem: FAB Total scores 8-5  
29  
30 4 Complete problem: FAB Total scores 4-0

31 **Answer: Please tick the number that best applies**

|                    |   |   |   |   |                  |   |   |   |  |
|--------------------|---|---|---|---|------------------|---|---|---|--|
| Very inappropriate |   |   |   |   | Very appropriate |   |   |   |  |
| 1                  | 2 | 3 | 4 | 5 | 6                | 7 | 8 | 9 |  |

**This is followed by questions on b410: Heart function, b415: Blood vessel function and others and a total of 43 ICF categories.**

For peer review only

1  
2  
3  
4  
5  
6  
7  
8  
9  
10  
11  
12  
13  
14  
15  
16  
17  
18  
19  
20  
21  
22  
23  
24  
25  
26  
27  
28  
29  
30  
31  
32  
33  
34  
35  
36  
37  
38  
39  
40  
41  
42  
43  
44  
45  
46  
47  
48  
49  
50  
51  
52  
53  
54  
55  
56  
57  
58  
59  
60

**Supplemental material 2**

Results of the literature review of the ICF linking Rules: correspondence table of 43 ICF categories and linked existing assessment batteries.

| Study                | Darzins SW, et al (2017) [46] | Milman N, et al (2015) [42] | Hoang-Kim A, et al (2013). [43] |       | Cieza A, et al (2005). [44] |       |     |             |              | Prodinge B, et al (2019) [47] |       | Alarcos Cieza (2008) [45] | Bladh S, et al (2013) [41] |        |     |       | Prodinge B, et al (2017) [40] |              |
|----------------------|-------------------------------|-----------------------------|---------------------------------|-------|-----------------------------|-------|-----|-------------|--------------|-------------------------------|-------|---------------------------|----------------------------|--------|-----|-------|-------------------------------|--------------|
| Assessment batteries | FIM                           | SF-36                       | EQ-5D                           | SF-36 | EQ-5D                       | SF-36 | NHP | WHOD AS 2.0 | WHOQ OL-CHEF | WHOD AS 2.0                   | SF-36 | SF-36                     | FES-I                      | FES(S) | ABC | SAFFE | FIM                           | Birthe Index |
| b110                 |                               |                             |                                 |       |                             |       |     |             |              |                               |       |                           |                            |        |     |       |                               |              |
| b114                 |                               |                             |                                 |       |                             |       |     |             |              |                               |       |                           |                            |        |     |       |                               |              |
| b130                 |                               | ✓                           |                                 | ✓     |                             |       | ✓   |             | ✓            |                               |       | ✓                         |                            |        |     |       |                               |              |
| b134                 |                               |                             |                                 |       |                             |       | ✓   |             | ✓            |                               |       |                           |                            |        |     |       |                               |              |
| b164                 |                               |                             |                                 |       |                             |       |     |             |              |                               |       |                           |                            |        |     |       |                               |              |
| b410                 |                               |                             |                                 |       |                             |       |     |             |              |                               |       |                           |                            |        |     |       |                               |              |
| b415                 |                               |                             |                                 |       |                             |       |     |             |              |                               |       |                           |                            |        |     |       |                               |              |
| b420                 |                               |                             |                                 |       |                             |       |     |             |              |                               |       |                           |                            |        |     |       |                               |              |
| b440                 |                               |                             |                                 |       |                             |       |     |             |              |                               |       |                           |                            |        |     |       |                               |              |
| b455                 |                               |                             |                                 |       |                             |       |     |             |              |                               |       |                           |                            |        |     |       |                               |              |
| b460                 |                               |                             |                                 |       |                             |       |     |             |              |                               |       |                           |                            |        |     |       |                               |              |
| b525                 | ✓                             |                             |                                 |       |                             |       |     |             |              |                               |       |                           |                            |        |     |       |                               |              |
| b530                 |                               |                             |                                 |       |                             |       |     |             |              |                               |       |                           |                            |        |     |       |                               |              |
| b540                 |                               |                             |                                 |       |                             |       |     |             |              |                               |       |                           |                            |        |     |       |                               |              |
| b620                 | ✓                             |                             |                                 |       |                             |       |     |             |              |                               |       |                           |                            |        |     |       |                               |              |
| b710                 |                               |                             |                                 |       |                             |       |     |             |              |                               |       |                           |                            |        |     |       |                               |              |
| b730                 |                               |                             |                                 |       |                             |       |     |             |              |                               |       |                           |                            |        |     |       |                               |              |
| s410                 |                               |                             |                                 |       |                             |       |     |             |              |                               |       |                           |                            |        |     |       |                               |              |

|    |      |   |  |   |   |   |   |   |   |   |  |   |   |   |   |   |   |   |
|----|------|---|--|---|---|---|---|---|---|---|--|---|---|---|---|---|---|---|
| 1  | d177 |   |  |   |   |   |   |   |   |   |  |   |   |   |   |   |   |   |
| 2  | d230 |   |  | ✓ | ✓ | ✓ |   | ✓ | ✓ |   |  |   |   |   |   |   |   |   |
| 3  | d310 |   |  |   |   |   |   | ✓ |   |   |  |   |   |   |   |   |   |   |
| 4  | d330 |   |  |   |   |   |   |   |   |   |  |   |   |   |   |   |   |   |
| 5  | d330 |   |  |   |   |   |   |   |   |   |  |   |   |   |   |   |   |   |
| 6  | d420 |   |  | ✓ |   |   |   |   |   | ✓ |  |   |   |   |   |   |   |   |
| 7  | d420 |   |  | ✓ |   |   |   |   |   | ✓ |  |   |   |   |   |   |   |   |
| 8  | d450 | ✓ |  | ✓ | ✓ | ✓ | ✓ | ✓ |   |   |  | ✓ |   | ✓ | ✓ | ✓ | ✓ | ✓ |
| 9  | d450 | ✓ |  | ✓ | ✓ | ✓ | ✓ | ✓ |   |   |  | ✓ |   | ✓ | ✓ | ✓ | ✓ | ✓ |
| 10 | d510 | ✓ |  | ✓ | ✓ | ✓ |   | ✓ |   | ✓ |  |   | ✓ | ✓ |   | ✓ |   | ✓ |
| 11 | d520 | ✓ |  |   |   |   |   |   |   | ✓ |  |   |   |   |   |   |   |   |
| 12 | d520 | ✓ |  |   |   |   |   |   |   | ✓ |  |   |   |   |   |   |   |   |
| 13 | d530 | ✓ |  |   |   |   |   |   |   | ✓ |  |   | ✓ |   |   | ✓ | ✓ |   |
| 14 | d540 | ✓ |  | ✓ | ✓ | ✓ | ✓ | ✓ |   |   |  | ✓ | ✓ |   |   | ✓ | ✓ |   |
| 15 | d540 | ✓ |  | ✓ | ✓ | ✓ | ✓ | ✓ |   |   |  | ✓ | ✓ |   |   | ✓ | ✓ |   |
| 16 | d550 | ✓ |  |   |   |   |   | ✓ |   |   |  |   |   |   |   |   |   | ✓ |
| 17 | d560 | ✓ |  |   |   |   |   |   |   |   |  |   |   |   |   |   |   |   |
| 18 | d560 | ✓ |  |   |   |   |   |   |   |   |  |   |   |   |   |   |   |   |
| 19 | d570 |   |  |   |   |   |   |   |   |   |  |   |   |   |   |   | ✓ |   |
| 20 | d620 |   |  |   |   |   |   |   |   | ✓ |  |   | ✓ | ✓ |   | ✓ |   |   |
| 21 | d620 |   |  |   |   |   |   |   |   | ✓ |  |   | ✓ | ✓ |   | ✓ |   |   |
| 22 | d630 |   |  |   |   |   |   | ✓ |   | ✓ |  |   | ✓ |   |   | ✓ |   |   |
| 23 | d630 |   |  |   |   |   |   | ✓ |   | ✓ |  |   | ✓ |   |   | ✓ |   |   |
| 24 | d640 |   |  | ✓ | ✓ |   |   | ✓ |   |   |  | ✓ | ✓ | ✓ | ✓ |   |   |   |
| 25 | d710 |   |  |   |   |   |   |   |   |   |  |   |   |   |   |   |   |   |
| 26 | d760 |   |  | ✓ | ✓ | ✓ |   |   |   |   |  |   |   |   |   |   |   |   |
| 27 | d760 |   |  | ✓ | ✓ | ✓ |   |   |   |   |  |   |   |   |   |   |   |   |
| 28 | d920 |   |  | ✓ | ✓ | ✓ | ✓ | ✓ | ✓ |   |  | ✓ |   |   |   | ✓ |   |   |
| 29 | d920 |   |  | ✓ | ✓ | ✓ | ✓ | ✓ | ✓ |   |  | ✓ |   |   |   | ✓ |   |   |
| 30 | e310 |   |  |   |   |   |   |   |   |   |  |   |   |   |   |   |   |   |
| 31 | e340 |   |  |   |   |   |   |   |   |   |  |   |   |   |   |   |   |   |
| 32 | e340 |   |  |   |   |   |   |   |   |   |  |   |   |   |   |   |   |   |
| 33 | e355 |   |  |   |   |   |   |   |   |   |  |   |   |   |   |   |   |   |
| 34 | e410 |   |  |   |   |   |   |   |   |   |  |   |   |   |   |   |   |   |
| 35 | e410 |   |  |   |   |   |   |   |   |   |  |   |   |   |   |   |   |   |
| 36 | e575 |   |  |   |   |   |   |   |   |   |  |   |   |   |   |   |   |   |
| 37 | e575 |   |  |   |   |   |   |   |   |   |  |   |   |   |   |   |   |   |
| 38 | e580 |   |  |   |   |   |   |   | ✓ |   |  |   |   |   |   |   |   |   |

Functional Independence Measure (FIM), Short-Form 36 health survey (SF-36), EuroQol 5 dimensions (EQ-5D), the Nottingham Health Profile(NHP), the World Health Organization Disability Assessment Schedule (WHODAS 2.0), the World Health Organization Quality of Life Assessment (WHOQOL-BREF)



1 Falls Efficacy Scale-International (FES-I), the Swedish version of the Falls Efficacy Scale (FES[S]), the Activities-specific Balance Confidence Scale (ABC),  
2 the modified Survey of Activities and Fear of Falling in the Elderly (SAFFE)  
3  
4  
5  
6  
7  
8  
9  
10  
11  
12  
13  
14  
15  
16  
17  
18  
19  
20  
21  
22  
23  
24  
25  
26  
27  
28  
29  
30  
31  
32  
33  
34  
35  
36  
37  
38  
39  
40  
41  
42  
43  
44  
45  
46

For peer review only

### Supplemental material 3

Results of the three questions of the 43 ICF categories in the first Delphi round

| ICF categories |                                                                     |                                                                                                  | Question Items                                             |                                        |                                                                                   |                                        |                                                                                                           |                                        |
|----------------|---------------------------------------------------------------------|--------------------------------------------------------------------------------------------------|------------------------------------------------------------|----------------------------------------|-----------------------------------------------------------------------------------|----------------------------------------|-----------------------------------------------------------------------------------------------------------|----------------------------------------|
|                |                                                                     |                                                                                                  | 1) Appropriateness of ICF 43 category scoring descriptions |                                        | 2) Appropriateness of existing assessment batteries linked to each ICF categories |                                        | 3) Appropriateness of the scoring methods for each ICF categories linked to existing assessment batteries |                                        |
|                |                                                                     |                                                                                                  | median score (/9)                                          | Number of outside median tertile (/21) | median score (/9)                                                                 | Number of outside median tertile (/21) | median score (/9)                                                                                         | Number of outside median tertile (/21) |
| 110            | Consciousness function                                              | Japan Coma Scale                                                                                 | 7                                                          | 7                                      | 8                                                                                 | 1                                      | 7                                                                                                         | 4                                      |
| 114            | Orientation function                                                | Mimi-Mental State Examination                                                                    | 8                                                          | 6                                      | 8                                                                                 | 2                                      | 8                                                                                                         | 4                                      |
| 130            | Energy and drive function                                           | Vitality Index                                                                                   | 7                                                          | 7                                      | 8                                                                                 | 2                                      | 8                                                                                                         | 2                                      |
| 134            | Sleep function                                                      | -                                                                                                | 7                                                          | 9                                      | -                                                                                 | -                                      | -                                                                                                         | -                                      |
| 164            | Higher-level cognitive functions                                    | Frontal Assessment Battery                                                                       | 7                                                          | 6                                      | 7                                                                                 | 7                                      | 7.5                                                                                                       | 4                                      |
| 410            | Heart function                                                      | Echocardiography; left ventricular function, Electrocardiogram                                   | 7                                                          | 4                                      | 7                                                                                 | 8                                      | 7                                                                                                         | 11                                     |
| 415            | Blood vessel function                                               | Fontaine classification                                                                          | 7                                                          | 5                                      | 8                                                                                 | 2                                      | 8                                                                                                         | 4                                      |
| 420            | Blood pressure function                                             | Blood pressure                                                                                   | 7                                                          | 6                                      | 7.5                                                                               | 4                                      | 8                                                                                                         | 4                                      |
| 440            | Respiration function                                                | Arterial Blood Gas Analysis, fraction of inspiratory oxygen, SpO <sub>2</sub> , Respiration Rate | 8                                                          | 4                                      | 8                                                                                 | 4                                      | 7                                                                                                         | 5                                      |
| 455            | Exercise tolerance function                                         | Specific Activity Scale                                                                          | 8                                                          | 3                                      | 7.5                                                                               | 1                                      | 7                                                                                                         | 3                                      |
| 460            | Sensations associated with cardiovascular and respiratory functions | NYHA classification                                                                              | 8                                                          | 4                                      | 8                                                                                 | 3                                      | 8                                                                                                         | 2                                      |
| 525            | Defaecation function                                                | -                                                                                                | 7                                                          | 6                                      | 7                                                                                 | 4                                      | -                                                                                                         | -                                      |
| 530            | Weight maintenance functions                                        | Body Mass Index                                                                                  | 7                                                          | 6                                      | 8                                                                                 | 3                                      | 8                                                                                                         | 4                                      |
| 545            | Water, mineral and electrolyte balance functions                    | Blood test: Na, K                                                                                | 7.5                                                        | 5                                      | 8                                                                                 | 4                                      | 7.5                                                                                                       | 6                                      |

1  
2  
3  
4  
5  
6  
7  
8  
9  
10  
11  
12  
13  
14  
15  
16  
17  
18  
19  
20  
21  
22  
23  
24  
25  
26  
27  
28  
29  
30  
31  
32  
33  
34  
35  
36  
37  
38  
39  
40  
41  
42  
43  
44  
45  
46  
47  
48  
49  
50  
51  
52  
53  
54  
55  
56  
57  
58  
59  
60

|               |                                                 |                                                                       |     |   |     |   |     |   |
|---------------|-------------------------------------------------|-----------------------------------------------------------------------|-----|---|-----|---|-----|---|
| b620          | Urination function                              | -                                                                     | 7   | 5 | 8   | 2 | -   | - |
| b710          | Mobility of joint function                      | Range Of Motion                                                       | 8   | 4 | 7   | 4 | 7   | 5 |
| b730          | Muscle power function                           | Manual Muscle Test or five-times sit-to-stand                         | 8   | 4 | 7.5 | 5 | 7.5 | 6 |
| s410          | Structure of the cardiovascular system          | Echocardiography; Severity of valve function<br>Chest radiograph; CTR | 7   | 5 | 7   | 9 | 7   | 9 |
| d177          | Making decisions                                | -                                                                     | 8   | 3 | -   | - | -   | - |
| d230          | Carrying out daily routine                      | -                                                                     | 8   | 2 | -   | - | -   | - |
| d310          | Communicating with-receiving-spoken messages    | FIM; Comprehension                                                    | 7.5 | 5 | 8   | 4 | 8   | 4 |
| d330          | Speaking                                        | FIM; Expression                                                       | 8   | 5 | 7   | 8 | 7   | 7 |
| d420          | Transferring oneself                            | FIM; Transfers                                                        | 8   | 3 | 8   | 0 | 8   | 2 |
| d450          | Walking                                         | FIM; Walk<br>5-m walk test                                            | 8   | 4 | 7   | 5 | 7   | 5 |
| d510          | Washing oneself                                 | FIM; Bathing                                                          | 8   | 3 | 8   | 4 | 7   | 4 |
| d520          | Caring for body parts                           | FIM; Grooming                                                         | 8   | 4 | 7.5 | 2 | 7   | 4 |
| d530          | Toileting                                       | FIM; Toileting                                                        | 7   | 4 | 8   | 1 | 8   | 4 |
| d540          | Dressing                                        | FIM; Dressing                                                         | 8   | 4 | 7.5 | 2 | 7   | 4 |
| d550/<br>d560 | Eating/ Drinking                                | FIM; Eating                                                           | 8   | 4 | 8   | 3 | 8   | 5 |
| d570          | Looking after one's health                      | -                                                                     | 7.5 | 3 | -   | - | -   | - |
| d620          | Acquisition of goods and services               | Instrumental Activities of Daily Living scale; Shopping               | 7.5 | 4 | 8   | 4 | 7   | 5 |
| d630          | Preparing meals                                 | Instrumental Activities of Daily Living scale; Food preparation       | 7   | 7 | 7.5 | 3 | 7   | 6 |
| d640          | Doing housework                                 | Instrumental Activities of Daily Living scale; Housekeeping           | 7   | 5 | 7   | 2 | 7   | 4 |
| d710          | Basic interpersonal interactions                | -                                                                     | 8   | 2 | -   | - | -   | - |
| d760          | Family relationships                            | -                                                                     | 8   | 3 | -   | - | -   | - |
| d920          | Recreation and leisure                          | -                                                                     | 8   | 4 | -   | - | -   | - |
| e310          | Immediate family                                | -                                                                     | 8   | 4 | -   | - | -   | - |
| e340          | Personal care providers and personal assistants | -                                                                     | 7   | 4 | -   | - | -   | - |
| e355          | Health professionals                            | -                                                                     | 8   | 4 | -   | - | -   | - |

1  
2  
3  
4  
5  
6  
7  
8  
9  
10  
11  
12  
13  
14  
15  
16  
17  
18  
19  
20  
21  
22  
23  
24  
25  
26  
27  
28  
29  
30  
31  
32  
33  
34  
35  
36  
37  
38  
39  
40  
41  
42  
43  
44  
45  
46  
47  
48  
49  
50  
51  
52  
53  
54  
55  
56  
57  
58  
59  
60

|                                                |                                                        |   |     |   |   |   |   |   |
|------------------------------------------------|--------------------------------------------------------|---|-----|---|---|---|---|---|
| 6<br>7<br>8<br>9<br>10<br>11<br>12<br>13<br>14 | Individual attitudes of immediate family members       | - | 7.5 | 5 | - | - | - | - |
| 9<br>10<br>11<br>12<br>13<br>14                | General social support services, systems, and policies | - | 7.5 | 5 | - | - | - | - |
| 12<br>13<br>14                                 | Health services, systems, and policies                 | - | 7.5 | 3 | - | - | - | - |

SpO<sub>2</sub>, oxygen saturation; NYHA, New York Heart Association; CTR, cardiothoracic ratio;

FIM, Functional Independence Measure.

Bolded text indicates items of disagreement.

# BMJ Open

## Development and appropriateness of a scoring method for International Classification of Functioning, Disabilities, and Health assessment in older patients with heart failure: a Delphi survey of expert panel in Japan

|                                 |                                                                                                                                                                                                                                                                                                                                                                                                                                                                                                                                                                                                                                                                                                                                                                                                                                                                                                                                                                                                                                                                                                                                                                                                                                                                                                                                                                                                                                                                                                                                                                                                                                                                                                                                                                                               |
|---------------------------------|-----------------------------------------------------------------------------------------------------------------------------------------------------------------------------------------------------------------------------------------------------------------------------------------------------------------------------------------------------------------------------------------------------------------------------------------------------------------------------------------------------------------------------------------------------------------------------------------------------------------------------------------------------------------------------------------------------------------------------------------------------------------------------------------------------------------------------------------------------------------------------------------------------------------------------------------------------------------------------------------------------------------------------------------------------------------------------------------------------------------------------------------------------------------------------------------------------------------------------------------------------------------------------------------------------------------------------------------------------------------------------------------------------------------------------------------------------------------------------------------------------------------------------------------------------------------------------------------------------------------------------------------------------------------------------------------------------------------------------------------------------------------------------------------------|
| Journal:                        | <i>BMJ Open</i>                                                                                                                                                                                                                                                                                                                                                                                                                                                                                                                                                                                                                                                                                                                                                                                                                                                                                                                                                                                                                                                                                                                                                                                                                                                                                                                                                                                                                                                                                                                                                                                                                                                                                                                                                                               |
| Manuscript ID                   | bmjopen-2021-060609.R2                                                                                                                                                                                                                                                                                                                                                                                                                                                                                                                                                                                                                                                                                                                                                                                                                                                                                                                                                                                                                                                                                                                                                                                                                                                                                                                                                                                                                                                                                                                                                                                                                                                                                                                                                                        |
| Article Type:                   | Original research                                                                                                                                                                                                                                                                                                                                                                                                                                                                                                                                                                                                                                                                                                                                                                                                                                                                                                                                                                                                                                                                                                                                                                                                                                                                                                                                                                                                                                                                                                                                                                                                                                                                                                                                                                             |
| Date Submitted by the Author:   | 08-Aug-2022                                                                                                                                                                                                                                                                                                                                                                                                                                                                                                                                                                                                                                                                                                                                                                                                                                                                                                                                                                                                                                                                                                                                                                                                                                                                                                                                                                                                                                                                                                                                                                                                                                                                                                                                                                                   |
| Complete List of Authors:       | Shiota, Shigehito; Hiroshima University Hospital, Heart Failure Center; Hiroshima University Hospital, Department of Rehabilitation<br>Kitagawa, Toshiro; Hiroshima University Hospital, Heart Failure Center; Hiroshima University Graduate School of Biomedical and Health Sciences , Department of Cardiovascular medicine<br>Goto, Naoya; Hiroshima University Hospital, Department of Rehabilitation<br>Fujisita, Hironori; Hiroshima University Hospital, Department of Rehabilitation<br>Tamekuni, Yurika; Hiroshima University Hospital, Department of Rehabilitation<br>Nakayama, Susumu; Home nursing station Sakurazaka<br>Mio, Naoki; Hiroshima University Hospital, Heart Failure Center; Hiroshima University Hospital, Department of Rehabilitation<br>Kanai, Kana; Hiroshima University Hospital, Heart Failure Center; Hiroshima University Hospital, Department of Rehabilitation<br>Naka, Makiko; Hiroshima University Hospital, Heart Failure Center<br>Yamaguchi, Mizuho; Hiroshima University Hospital, Heart Failure Center<br>Mochizuki, Mariko; Hiroshima Care Manager Association<br>Ochikubo, Hiroyuki; Hiroshima Care Manager Association<br>Hidaka, Takayuki; Hiroshima Prefectural Hospital, Department of Cardiovascular Medicine<br>Yasunobu, Yuji; Miyoshi Medical Association Hospital, Department of Cardiovascular Medicine<br>Nakano, Yukiko; Hiroshima University Hospital, Heart Failure Center; Hiroshima University Graduate School of Biomedical and Health Sciences, Department of Cardiovascular medicine<br>Kihara, Yasuki; Hiroshima University Graduate School of Biomedical and Health Sciences<br>Kimura, Hiroaki; Hiroshima University Hospital, Heart Failure Center; Hiroshima University Hospital, Department of Rehabilitation Medicine |
| <b>Primary Subject Heading</b>: | Rehabilitation medicine                                                                                                                                                                                                                                                                                                                                                                                                                                                                                                                                                                                                                                                                                                                                                                                                                                                                                                                                                                                                                                                                                                                                                                                                                                                                                                                                                                                                                                                                                                                                                                                                                                                                                                                                                                       |
| Secondary Subject Heading:      | Health informatics, Public health, Cardiovascular medicine                                                                                                                                                                                                                                                                                                                                                                                                                                                                                                                                                                                                                                                                                                                                                                                                                                                                                                                                                                                                                                                                                                                                                                                                                                                                                                                                                                                                                                                                                                                                                                                                                                                                                                                                    |
| Keywords:                       | Heart failure < CARDIOLOGY, REHABILITATION MEDICINE, PUBLIC                                                                                                                                                                                                                                                                                                                                                                                                                                                                                                                                                                                                                                                                                                                                                                                                                                                                                                                                                                                                                                                                                                                                                                                                                                                                                                                                                                                                                                                                                                                                                                                                                                                                                                                                   |

1  
2  
3  
4  
5  
6  
7  
8  
9  
10  
11  
12  
13  
14  
15  
16  
17  
18  
19  
20  
21  
22  
23  
24  
25  
26  
27  
28  
29  
30  
31  
32  
33  
34  
35  
36  
37  
38  
39  
40  
41  
42  
43  
44  
45  
46  
47  
48  
49  
50  
51  
52  
53  
54  
55  
56  
57  
58  
59  
60

|  |                            |
|--|----------------------------|
|  | HEALTH, GERIATRIC MEDICINE |
|  |                            |

SCHOLARONE™  
Manuscripts



I, the Submitting Author has the right to grant and does grant on behalf of all authors of the Work (as defined in the below author licence), an exclusive licence and/or a non-exclusive licence for contributions from authors who are: i) UK Crown employees; ii) where BMJ has agreed a CC-BY licence shall apply, and/or iii) in accordance with the terms applicable for US Federal Government officers or employees acting as part of their official duties; on a worldwide, perpetual, irrevocable, royalty-free basis to BMJ Publishing Group Ltd ("BMJ") its licensees and where the relevant Journal is co-owned by BMJ to the co-owners of the Journal, to publish the Work in this journal and any other BMJ products and to exploit all rights, as set out in our [licence](#).

The Submitting Author accepts and understands that any supply made under these terms is made by BMJ to the Submitting Author unless you are acting as an employee on behalf of your employer or a postgraduate student of an affiliated institution which is paying any applicable article publishing charge ("APC") for Open Access articles. Where the Submitting Author wishes to make the Work available on an Open Access basis (and intends to pay the relevant APC), the terms of reuse of such Open Access shall be governed by a Creative Commons licence – details of these licences and which [Creative Commons](#) licence will apply to this Work are set out in our licence referred to above.

Other than as permitted in any relevant BMJ Author's Self Archiving Policies, I confirm this Work has not been accepted for publication elsewhere, is not being considered for publication elsewhere and does not duplicate material already published. I confirm all authors consent to publication of this Work and authorise the granting of this licence.

1  
2  
3  
4  
5  
6 1 Original research

7 2  
8  
9 3 **Development and appropriateness of a scoring method for International**  
10 4 **Classification of Functioning, Disabilities, and Health assessment in older patients**  
11 5 **with heart failure: a Delphi survey of expert panel in Japan**

12 6  
13 7 Shigehito Shiota<sup>1,2</sup>, Toshiro Kitagawa<sup>1,3</sup>, Naoya Goto<sup>2</sup>, Hironori Fujisita<sup>2</sup>, Yurika  
14 8 Tamekuni<sup>2</sup>, Susumu Nakayama<sup>4</sup>, Naoki Mio<sup>1,2</sup>, Kana Kanai<sup>1,2</sup>, Makiko Naka<sup>1</sup>, Mizuho  
15 9 Yamaguchi<sup>1</sup>, Mariko Mochizuki<sup>5</sup>, Hiroyuki Ochikubo<sup>5</sup>, Takayuki Hidaka<sup>6</sup>, Yuji Yasunobu<sup>7</sup>,  
16 10 Yukiko Nakano<sup>1,3</sup>, Yasuki Kihara<sup>8</sup>, Hiroaki Kimura<sup>1,9</sup>

17 11  
18  
19 12 <sup>1</sup> Heart Failure Centre, Hiroshima University Hospital, Hiroshima, Japan

20 13 <sup>2</sup> Division of Clinical Support, Department of Rehabilitation, Hiroshima University  
21 14 Hospital, Hiroshima, Japan

22 15 <sup>3</sup> Hiroshima University Graduate School of Biomedical and Health Sciences, Hiroshima,  
23 16 Japan

24 17 <sup>4</sup> Home nursing station Sakurazaka, Hiroshima, Japan

25 18 <sup>5</sup> Hiroshima Care Manager Association, Hiroshima, Japan.

26 19 <sup>6</sup> Department of Cardiovascular Medicine, Hiroshima Prefectural Hospital, Hiroshima,  
27 20 Japan

28 21 <sup>7</sup> Department of Cardiovascular Medicine, Miyoshi Medical Association Hospital,  
29 22 Hiroshima, Japan

30 23 <sup>8</sup> Hiroshima University Graduate School of Biomedical and Health Sciences, Hiroshima,  
31 24 Japan

32 25 <sup>9</sup> Department of Rehabilitation Medicine, Hiroshima University Hospital, Hiroshima,  
33 26 Japan

34 27

35 28 Word count: 4932 words



1  
2  
3  
4  
5  
6 29 **Corresponding author:**  
7

8 30 Shigehito Shiota  
9

10 31 Email: [sshiota@hiroshima-u.ac.jp](mailto:sshiota@hiroshima-u.ac.jp)  
11  
12

13 32 Address: 1-2-3, Kasumi, Minami-ku, Hiroshima City, Hiroshima, Japan  
14  
15

16 33  
17  
18  
19  
20  
21  
22  
23  
24  
25  
26  
27  
28  
29  
30  
31  
32  
33  
34  
35  
36  
37  
38  
39  
40  
41  
42  
43  
44  
45  
46  
47  
48  
49  
50  
51  
52  
53  
54  
55  
56  
57  
58  
59  
60

For peer review only

1  
2  
3  
4  
5  
6  
7  
8  
9  
10  
11  
12  
13  
14  
15  
16  
17  
18  
19  
20  
21  
22  
23  
24  
25  
26  
27  
28  
29  
30  
31  
32  
33  
34  
35  
36  
37  
38  
39  
40  
41  
42  
43  
44  
45  
46  
47  
48  
49  
50  
51  
52  
53  
54  
55  
56  
57  
58  
59  
60

## 34 **ABSTRACT**

35 **Objective:** The number of older patients with heart failure (HF) is increasing in Japan  
36 and has become a social problem. There is an urgent need to develop a comprehensive  
37 assessment methodology based on the common language of health care; the  
38 International Classification of Functioning, Disability and Health (ICF). The purpose of  
39 this study was to develop and confirm the appropriateness of a scoring methodology for  
40 43 ICF categories in older people with HF.

41 **Design:** Cross-sectional survey. We applied the RAND/UCLA Appropriateness Method  
42 with a modified Delphi method.

43 **Setting and participants:** We included a panel of 26 multidisciplinary experts on HF  
44 care consisting of home physicians, cardiovascular physicians, care managers, nurses,  
45 physical therapists, a pharmacist, occupational therapist, nutritionist, and a social worker.

46 **Measures:** We conducted a literature review of ICF linking rules and developed a  
47 questionnaire on scoring methods linked to ICF categories in older people with HF. In  
48 the Delphi rounds, we sent the expert panel a questionnaire consisting of three questions  
49 for each of the 43 ICF categories. The expert panel responded to the questionnaire items  
50 on a 1 (very inappropriate) – 9 (very appropriate) Likert scale and repeated rounds until  
51 a consensus of 'Appropriate' and 'Agreement' was reached on all items.

52 **Results:** A total of 21 panel members responded to all the Delphi rounds. In the first  
53 Delphi round, six question items in four ICF categories did not reach a consensus of  
54 'Agreement', but the result of our modifications based on panel members' suggestions  
55 reached to a consensus of 'Appropriate' and 'Agreement' on all questions in the second  
56 Delphi round.

57 **Conclusion:** The ICF-based scoring method for older people with HF developed in this  
58 study was found to be appropriate. Future work is needed to clarify whether  
59 comprehensive assessment and information sharing based on ICF contributes to  
60 preventing readmissions.

61  
62 **Keywords:** heart failure, older people, ICF, scoring methods, RAND/UCLA  
63 Appropriateness Method

## 64 **Strengths and limitations of this study**

65 **►** An expert panel familiar with heart failure care, consisting of home physicians, care  
66 managers, and multidisciplinary medical professionals, rated the "appropriateness" of  
67 the questions in each ICF category through a multiple-round process to reach a  
68 consensus.  
69

- 1  
2  
3  
4  
5  
6 70 ▶ The assessment domains studied the 43-item ICF relevant to older adults with heart  
7 71 failure, covering not only the medical assessment but also the physical and mental  
8 72 functioning, activity and social participation, and environmental factors.  
9  
10 73 ▶The expert panel comprised general practitioners, cardiologists, and paramedical  
11 74 professions (rehabilitation, nursing care, and welfare), but caution is needed in  
12 75 generalizing the findings because of the study's limited geographical area.  
13  
14  
15 76

16  
17  
18  
19  
20  
21  
22  
23  
24  
25  
26  
27  
28  
29  
30  
31  
32  
33  
34  
35  
36  
37  
38  
39  
40  
41  
42  
43  
44  
45  
46  
47  
48  
49  
50  
51  
52  
53  
54  
55  
56  
57  
58  
59  
60

For peer review only

## INTRODUCTION

In Japan, cardiovascular disease is the second leading cause of death. [1] In addition, cardiovascular disease accounts for 20.6% of all cases requiring nursing care, and the annual medical costs exceed 6 trillion yen (USD 46 billion). [2,3] The Japanese government has approved the Japanese National Plan for Promotion of Measures Against Cerebrovascular and Cardiovascular Disease in 2020. This Japanese National Plan promotes the establishment of a comprehensive community care system that encompasses health, medical care, welfare, nursing care, and the sharing of evidence-based information. [4,5]

Among cardiovascular diseases, heart failure (HF) is increasing with the ageing of the population, with the number of patients in Japan expected to exceed 1.3 million by 2030. [6,7] HF reduces the quality of life of patients and their families by repeated rehospitalizations due to exacerbations, and the increased burden of medical expenses. [8-10] The one-year readmission rate for patients with HF is 35% in Japan, but a study of elderly patients with HF in the United States reported a rate of 64%. [11,12] Elderly patients with HF have multiple comorbidities, such as atrial fibrillation, chronic renal failure, dementia, and depression, which are factors associated with readmission. [13] In addition, many factors have been reported to be associated with readmission in patients with HF, including cognitive function, depression/anxiety, exercise tolerance, muscle strength, walking speed, activities of daily living (ADL), and instrumental activities of daily living (IADL). [14-18] The Guideline on Diagnosis and Treatment of Acute and Chronic Heart Failure (JCS 2017/ JHFS 2017) recommends that patients with limited self-care capabilities, such as elderly patients with HF, should receive education and support from their families and actively utilise social resources such as home physicians and home-visit nursing. [19] Social support and information sharing in the community have been reported to prevent HF readmissions, and there is an urgent need to establish an information sharing system between medical professionals and care professionals in the community. [20,21]

The Japanese Society of Heart Failure recommends the use of the International Classification of Functioning, Disability and Health (ICF) for the comprehensive assessment and multidisciplinary information sharing in elderly patients with HF. [22] The ICF was introduced by the WHO in 2001; it aims to provide a framework for health and health-related conditions. The ICF is expected to be used as a common language for patients, their families, medical professionals, and caregivers. [23] However, the ICF has not been widely used in clinical practice because of the complexity of the coding and the unreliability of the scores. [24-28] To promote the use of the ICF in clinical practice, the

1  
2  
3  
4  
5  
6 113 World Health Organisation provides the ICF Core Set and the ICF Linking Rules. The  
7 114 ICF Core Set is a set of identified ICF categories for assessing a patient's special health  
8 115 condition or special medical background. [29] The ICF Linking Rules are a method of  
9 116 linking ICF categories with existing assessment methods. [30,31] The ICF core set for  
10 117 chronic ischaemic heart disease and the Geriatric ICF core set have already been  
11 118 developed, but these ICF categories are not appropriate for adaptation to older patients  
12 119 with heart failure. [32,33] Therefore, 43 ICF categories were selected for the  
13 120 comprehensive assessment of older patients with HF through the questionnaire survey  
14 121 of a multidisciplinary group of medical professionals and care professionals. [34,35] The  
15 122 43 ICF categories specific to older patients with HF consisted of 17 body functions and  
16 123 one body structure, 19 activities and participation, and 6 environmental factors. However,  
17 124 in order to efficiently utilize ICF-based assessments in clinical practice, it is necessary to  
18 125 develop scoring methods linked to existing assessments.

19 126 The purpose of this study was to develop a scoring method of older patients with HF  
20 127 based on the ICF, and to determine its appropriateness using the Delphi technique.  
21 128

## 22 129 **METHOD**

### 23 130 **Patient and public involvement**

24 131 Patients and the public are not involved in the design, planning, conduct or reporting of  
25 132 this study.  
26 133

### 27 134 **Design**

28 135 We applied the Delphi method to an expert panel. The Delphi method is a consensus  
29 136 method used in the development of guidelines and clinical indicators, and is effective in  
30 137 guiding assessments and treatments for which there is limited evidence. The Delphi  
31 138 method is also a standard practice in the development of ICF Core Sets. [29] We  
32 139 developed a questionnaire based on the literature review and structured a two-stage  
33 140 Delphi survey with an expert panel, referring to the RAND/UCLA appropriateness  
34 141 methodology. [36] (Figure 1).  
35 142

### 36 143 **Establishing of the expert panel**

37 144 We established an expert multidisciplinary panel consisting of 26 medical and care  
38 145 professionals in Hiroshima Prefecture, Japan. The members of the expert committee  
39 146 were professionals with leadership roles in community care, all of whom have expertise  
40 147 in the assessment, treatment, and care of older patients with heart failure. Five home  
41 148 physicians and ten care managers were recommended by the Hiroshima Care Manager

1  
2  
3  
4  
5  
6 149 Association. All five home physicians are specialists in internal medicine who engage in  
7 150 home visits while all ten care managers are board members of the Hiroshima Care  
8 151 Manager Association and leaders in their respective communities. In addition, we  
9 152 included 11 medical multidisciplinary professionals involved in HF care at specialised  
10 153 medical institutions recommended by the Hiroshima Heart Health Promotion Project in  
11 154 our panel .[37] The 11 medical multidisciplinary members were: two cardiovascular  
12 155 physicians, three nurses certified in chronic HF nursing, two physiotherapists with  
13 156 registered instructors of cardiac rehabilitation, one occupational therapist with registered  
14 157 instructors of cardiac rehabilitation, one certified pharmacist, one nutritionist, and one  
15 158 social worker.  
16 159

### 160 **Development of the questionnaire**

161 We developed scoring methods for the 43 ICF categories linking to existing  
162 assessment batteries. [34,35] To develop the questionnaire, we first conducted a  
163 literature review of the ICF linking rules. The ICF linking rules are a systematic  
164 methodology for linking the existing assessment batteries to the ICF codes. [30,31] All  
165 articles related to the ICF linking rule from January, 2005 to August, 2020 were included  
166 in the study. We used MEDLINE (PubMed), Cochrane Library, CINAHL, and PsycInfo  
167 as electronic article databases. The search terms in the electronic article database were  
168 "ICF" and "Linking rule" or "Rasch" in medical subject headings (MeSH). The search  
169 criteria were as follows: (1) written in English, (2) cross-sectional study, cohort study, or  
170 case-control study, (3) target group of people aged 18 years or older, (4) use of an  
171 existing assessment battery, (5) results from ICF data or Rasch analysis of the ICF data,  
172 and (6) "ICF" and "linking rule" present in the title. The literature review was carried out  
173 by five authors (SS, NG, HF, SN, and YT) in two phases. In the first phase, the  
174 appropriateness of the titles and abstracts were assessed based on the search criteria.  
175 In the second phase, the full text was assessed. Finally, we conducted a qualitative  
176 analysis of the articles to select an assessment battery that could be adapted to older  
177 patients with HF and to clarify its association with the 43 ICF categories. We completed  
178 the questionnaire based on the results of this literature review and the explanatory notes  
179 in the ICF Reference Guide. [38,39] We set three questions for each of the 43 ICF  
180 categories and prepared 1 (very inappropriate) - 9 (very appropriate) Likert scale  
181 responses to assess appropriateness. Appropriateness was evaluated on a median  
182 response scale with the following three levels: 1-3 as "inappropriate", 4-6 as "uncertain",  
183 and 7-9 as "appropriate". The three questionnaire items were as follows: 1)  
184 Appropriateness of the 43 ICF category scoring descriptions, 2) appropriateness of

1  
2  
3  
4  
5  
6 185 existing assessment batteries linked to each ICF categories, and 3) appropriateness of  
7 186 the scoring methods for each ICF categories linked to existing assessment batteries. All  
8 187 questionnaires were developed using a Google Form, with a description of each ICF  
9 188 category and the rationale for scoring. (Supplemental materials 1).  
10  
11  
12

189

### 190 **Delphi process and funding consensus**

191 The Delphi process for reaching a consensus is shown in Figure 1. Following the  
192 RAND/UCLA appropriateness methodology [28], we used the median scores of the  
193 responses from the panellists to assess appropriateness. We rated the appropriateness  
194 of the 43 ICF categories as 'Appropriate' if the median respondent's score was from 7–  
195 9, 'Uncertain' if it was from 4–6, and 'Inappropriate' if it was from 1–3. In accordance with  
196 the RAND/UCLA guidelines, we defined 'Agreement' or 'Disagreement' according to the  
197 number of panellists who rated outside the range of the tertiles (1–3; 4–6; 7–9), including  
198 the median. 'Agreement' was defined as fewer than one-third of panellists rating outside  
199 the range of the tertile values, whereas 'Disagreement' was defined as more than one-  
200 third of panellists rating the extremes (1–3 range and 7–9 range), not including the  
201 median.

202 Before conducting the Delphi survey, the HF Centre (HFC) held an online meeting for  
203 the panel members. In the online meeting, we explained the purpose of our study and  
204 the methods of the Delphi process to the panel members and obtained their consent to  
205 participate in the study. In the first round, the HFC mailed a sheet with instructions on  
206 how to conduct the ICF category adequacy assessment, as well as the URL and QR  
207 codes for the questionnaire. The panel members responded to three questions in 43 ICF  
208 categories on a scale of 1-9. In addition, panel members provided open-ended  
209 suggestions for improvements to the questions they scored 1-6. The HFC collated the  
210 panel members' responses. We revised the scoring descriptions and existing  
211 assessment batteries linked to the ICF categories responded to as 'Inappropriate',  
212 'Uncertain' or 'Disagreement' based on the panel's suggestions. In the second round,  
213 the HFC emailed the revised questionnaire and feedback based on the panel members'  
214 responses. As in the first round, panel members again scored the appropriateness of  
215 three of the question items in all 43 ICF categories. In addition, the panel members  
216 provided suggestions for improvements to the scoring methods on those ones scored  
217 1-6.

218 The HFC compiled the panel members' responses and assessed their appropriateness.  
219 We also revised the descriptions of the questionnaire or scoring methods based on the  
220 panel's suggestions. The revised questionnaire was emailed to the panel members, and

221 a final consensus was reached after confirming that there were no comments for revision.

222

### 223 **Analysis**

224 Data were exported from Google Forms to Microsoft Excel 2019 (Microsoft Washington  
225 USA) for descriptive calculations. Data are presented as simple totals and median.

226

### 227 **Ethics**

228 This study was conducted in accordance with the principles of the Declaration of  
229 Helsinki. We explained the purpose and content of the study in writing and at online  
230 meetings to the expert panel members who participated in the study and obtained their  
231 written consent. The received data was processed after deleting personal information  
232 (names). Approval was obtained from the Ethical Review Committee for Epidemiological  
233 Research, Hiroshima University (Approval No: E-2580). This study was supported by the  
234 MHLW Comprehensive Research on Statistical Information Program, Grant Number  
235 JPMH20AB1002.

236

## 237 **RESULTS**

### 238 **Characteristics of the expert panel participants**

239 A total of 26 experts agreed to participate in the study. In the first round, 24 of the 26  
240 invited experts responded to the questionnaire. In the second Delphi round, 21 experts  
241 responded to the questionnaires. Table 1 shows the characteristics of the experts who  
242 responded to all Delphi rounds.

243

244 Table 1 Characteristics of the expert panel participants who responded to all Delphi  
245 rounds (n = 21)

| Characteristics           | n (%)     |
|---------------------------|-----------|
| <b>Sex</b>                |           |
| Male                      | 8 (38.1)  |
| Female                    | 13 (61.9) |
| <b>Professions</b>        |           |
| Home physicians           | 4 (19.0)  |
| Cardiovascular physicians | 1 (4.8)   |
| Care managers             | 9 (42.8)  |
| Nurses                    | 3 (14.3)  |
| Pharmacist                | 1 (4.8)   |
| Physical therapists       | 2 (9.5)   |



|                                            |          |
|--------------------------------------------|----------|
| Occupational therapist                     | 1 (4.8)  |
| Type of facilities                         |          |
| Hospital: Acute care ward                  | 6 (28.6) |
| Hospital: Rehabilitation ward              | 2 (9.5)  |
| Clinic                                     | 4 (19.0) |
| Regional comprehensive support centre      | 2 (9.5)  |
| Community care centre/Home nursing station | 6 (28.6) |
| Municipal office                           | 1 (4.8)  |

### 246 247 **Development of the Delphi questionnaire of ICF assessment method for older** 248 **patients with heart failure**

249 Figure 2 showed the process of literature review. Following a two-stage screening  
250 process, we conducted a qualitative analysis of 26 references. In the qualitative analysis,  
251 we excluded 19 references dealing with disease-specific assessment batteries that could  
252 not be adapted to older patients with HF (e.g., stroke, musculoskeletal disease, hand  
253 surgery, low back pain). Eight articles on ICF linking rules were included. Finally, we  
254 employed 11 existing assessment batteries on eight articles links to the 43 ICF  
255 categories (Supplemental material 2). [40-47] Eleven existing assessment batteries were  
256 included: assessment of ADL (such as Functional Independence Measure (FIM) and  
257 Barthel Index), assessment of general health-related quality of life (such as Short Form  
258 36 and the European Quality of Life instrument (EQ-5D), The World Health Organization  
259 Quality of Life (WHOQOL)), assessment of general health status (such as the  
260 Nottingham Health Profile(NHP), the World Health Organization Disability Assessment  
261 Schedule (WHODAS 2.0)), and assessment of falls (such as Falls Efficacy Scale-  
262 International (FES-I), the Swedish version of the Falls Efficacy Scale (FES[S]), the  
263 Activities-specific Balance Confidence Scale (ABC), and the modified Survey of Activities  
264 and Fear of Falling in the Elderly (SAFFE)). We identified these existing assessment  
265 batteries as linked to 20 of the 43 categories. However, we included only the FIM and  
266 the BI. We did not include assessment batteries for general health-related quality of life,  
267 general health status, and falls in the questionnaire because these were not consistent  
268 with the aims of this study.

269 Therefore, we developed a scoring methodology for ICF categories other than ADL,  
270 based on the Italian ICF Guidelines and the ICF Reference Guide. [38,39,48] Finally, we  
271 decided to provide 30 existing assessment batteries linking to ICF categories, and to  
272 score the remaining 13 categories using only the scoring descriptions (Table 2).

### 274 **Delphi round 1**

275 From February to March of 2021, 24 panel members (92.3%) responded to Round 1 of  
276 the Delphi process. 'Agreement' was defined as when seven or fewer panellists rated  
277 outside the range of the three quartiles (1-3; 4-6; 7-9), including the median.  
278 'Disagreement' was defined as eight or more panellists rating the extremes (1-3 range  
279 and 7-9 range) that did not include the median. The results of the Delphi round 1 panel  
280 members' responses are shown in Supplementary material 3. The median response of  
281 panel members was 'appropriate' 7-9 for all three questions in the 43 ICF categories. In  
282 the result, 'Agreement' was not reached on six question items in four ICF categories. The  
283 question items in the ICF categories on which agreement was not reached were 'b134  
284 Sleep functions: 1) scoring descriptions, b410 Heart function: 2) existing assessment  
285 batteries and 3) scoring methods linked to ICF categories, s410 Structure of the  
286 cardiovascular systems: 2) existing assessment battery and 3) scoring methods linked  
287 to ICF categories and d330 Speaking: 2) existing battery of assessments'. We added a  
288 scoring method for d134 Sleep function based on the Pittsburgh Sleep Quality Index,  
289 based on the panel members' suggestions. For b410 heart function, S410 Structure of  
290 cardiovascular system and d330 Speaking, we revised the existing assessment battery  
291 and scoring method linked to the ICF categories based on the panel's suggestions.

### 293 **Delphi round 2**

294 From April to May of 2021, we emailed the revised questionnaire to the 24 panel  
295 members who responded to Round 1. Twenty-one panel members (87.5%) responded  
296 to the Round 2 questionnaire. 'Agreement' was defined as when six or fewer panellists  
297 rated outside the range of the three quartiles (1-3; 4-6; 7-9), including the median.  
298 'Disagreement' was defined as seven or more panellists rating the extremes (1-3 range  
299 and 7-9 range) that did not include the median. Table 2 shows the results of the panel  
300 members' responses to Delphi Round 2. The results showed that for all ICF category  
301 questions, the median responses ranged from 7 to 9 'Appropriate', with all items reaching  
302 'Agreement'. However, as two panel members answered 'Inappropriate' 1-3 for the d450  
303 gait, we modified the existing assessment battery linked to the ICF categories to FIM  
304 only, based on members' suggestions. We sent the manual of the modified assessment  
305 method by e-mail to all panel members who participated in Round 2, asking for their  
306 comments, and confirming that we had reached a consensus.

309 Table 2: Results of the three questions of the 43 ICF categories in the second Delphi

310

round.

| ICF categories |                                                                     | Existing assessment batteries linked to ICF categories         | Question Items                                             |                                        |                                                                                   |                                        |                                                                                                           |                                        |
|----------------|---------------------------------------------------------------------|----------------------------------------------------------------|------------------------------------------------------------|----------------------------------------|-----------------------------------------------------------------------------------|----------------------------------------|-----------------------------------------------------------------------------------------------------------|----------------------------------------|
|                |                                                                     |                                                                | 1) Appropriateness of ICF 43 category scoring descriptions |                                        | 2) Appropriateness of existing assessment batteries linked to each ICF categories |                                        | 3) Appropriateness of the scoring methods for each ICF categories linked to existing assessment batteries |                                        |
|                |                                                                     |                                                                | median score (/9)                                          | Number of outside median tertile (/21) | median score (/9)                                                                 | Number of outside median tertile (/21) | median score (/9)                                                                                         | Number of outside median tertile (/21) |
| 7110           | Consciousness function                                              | Japan Coma Scale                                               | 8                                                          | 3                                      | 9                                                                                 | 2                                      | 8                                                                                                         | 1                                      |
| 6114           | Orientation function                                                | Mimi-Mental State Examination                                  | 8                                                          | 3                                      | 8                                                                                 | 4                                      | 8                                                                                                         | 2                                      |
| 6130           | Energy and drive function                                           | Vitality Index                                                 | 8                                                          | 2                                      | 8                                                                                 | 3                                      | 8                                                                                                         | 2                                      |
| 6134           | Sleep function                                                      | Pittsburgh Sleep Quality Index                                 | 8                                                          | 2                                      | 8                                                                                 | 2                                      | 7                                                                                                         | 4                                      |
| 6164           | Higher-level cognitive functions                                    | Frontal Assessment Battery                                     | 8                                                          | 2                                      | 8                                                                                 | 2                                      | 8                                                                                                         | 3                                      |
| 6410           | Heart function                                                      | Echocardiography; left ventricular function, Electrocardiogram | 7                                                          | 4                                      | 8                                                                                 | 3                                      | 7                                                                                                         | 3                                      |
| 6415           | Blood vessel function                                               | Fontaine classification                                        | 8                                                          | 4                                      | 8                                                                                 | 2                                      | 8                                                                                                         | 4                                      |
| 6420           | Blood pressure function                                             | Blood pressure                                                 | 8                                                          | 4                                      | 8                                                                                 | 1                                      | 8                                                                                                         | 2                                      |
| 6440           | Respiration function                                                | SpO <sub>2</sub> , Respiration Rate                            | 8                                                          | 2                                      | 8                                                                                 | 3                                      | 8                                                                                                         | 1                                      |
| 6455           | Exercise tolerance function                                         | Specific Activity Scale                                        | 8                                                          | 2                                      | 8                                                                                 | 3                                      | 8                                                                                                         | 1                                      |
| 6460           | Sensations associated with cardiovascular and respiratory functions | NYHA classification                                            | 8                                                          | 2                                      | 8                                                                                 | 1                                      | 9                                                                                                         | 1                                      |
| 6525           | Defaecation function                                                | -                                                              | 8                                                          | 3                                      | -                                                                                 | -                                      | -                                                                                                         | -                                      |
| 6530           | Weight maintenance functions                                        | Body Mass Index                                                | 8                                                          | 3                                      | 8                                                                                 | 3                                      | 8                                                                                                         | 3                                      |
| 6545           | Water, mineral and electrolyte balance functions                    | Blood test: Na, K                                              | 8                                                          | 4                                      | 8                                                                                 | 3                                      | 7                                                                                                         | 3                                      |
| 6620           | Urination function                                                  | -                                                              | 8                                                          | 4                                      | -                                                                                 | -                                      | -                                                                                                         | -                                      |
| 6710           | Mobility of joint function                                          | Range Of Motion                                                | 8                                                          | 3                                      | 8                                                                                 | 3                                      | 8                                                                                                         | 2                                      |
| 6730           | Muscle power function                                               | Manual Muscle Test or five-times                               | 8                                                          | 3                                      | 8                                                                                 | 3                                      | 8                                                                                                         | 4                                      |

1  
2  
3  
4

|    |                                        |                                                                       |                                                                 |   |   |   |   |   |   |
|----|----------------------------------------|-----------------------------------------------------------------------|-----------------------------------------------------------------|---|---|---|---|---|---|
| 5  |                                        | sit-to-stand                                                          |                                                                 |   |   |   |   |   |   |
| 6  |                                        |                                                                       |                                                                 |   |   |   |   |   |   |
| 7  | Structure of the cardiovascular system | Echocardiography; Severity of valve function<br>Chest radiograph; CTR | 7                                                               | 3 | 7 | 3 | 8 | 2 |   |
| 8  |                                        |                                                                       |                                                                 |   |   |   |   |   |   |
| 9  | 410                                    |                                                                       |                                                                 |   |   |   |   |   |   |
| 10 |                                        |                                                                       |                                                                 |   |   |   |   |   |   |
| 11 | 177                                    | Making decisions                                                      | -                                                               | 8 | 3 | - | - | - | - |
| 12 | 230                                    | Carrying out daily routine                                            | -                                                               | 8 | 2 | - | - | - | - |
| 13 |                                        |                                                                       |                                                                 |   |   |   |   |   |   |
| 14 | 310                                    | Communicating with-receiving-spoken messages                          | FIM; Comprehension                                              | 8 | 2 | 8 | 1 | 8 | 1 |
| 15 |                                        |                                                                       |                                                                 |   |   |   |   |   |   |
| 16 | 330                                    | Speaking                                                              | FIM; Expression                                                 | 8 | 2 | 8 | 1 | 8 | 2 |
| 17 |                                        |                                                                       |                                                                 |   |   |   |   |   |   |
| 18 | 420                                    | Transferring oneself                                                  | FIM; Transfers                                                  | 8 | 1 | 8 | 1 | 8 | 1 |
| 19 |                                        |                                                                       |                                                                 |   |   |   |   |   |   |
| 20 | 450                                    | Walking                                                               | FIM; Walk<br>5-m walk test                                      | 8 | 1 | 8 | 2 | 8 | 5 |
| 21 |                                        |                                                                       |                                                                 |   |   |   |   |   |   |
| 22 | 510                                    | Washing oneself                                                       | FIM; Bathing                                                    | 8 | 1 | 8 | 1 | 8 | 1 |
| 23 |                                        |                                                                       |                                                                 |   |   |   |   |   |   |
| 24 | 520                                    | Caring for body parts                                                 | FIM; Grooming                                                   | 7 | 1 | 8 | 2 | 7 | 1 |
| 25 |                                        |                                                                       |                                                                 |   |   |   |   |   |   |
| 26 | 530                                    | Toileting                                                             | FIM; Toileting                                                  | 7 | 2 | 9 | 2 | 7 | 3 |
| 27 |                                        |                                                                       |                                                                 |   |   |   |   |   |   |
| 28 | 540                                    | Dressing                                                              | FIM; Dressing                                                   | 8 | 1 | 8 | 1 | 8 | 1 |
| 29 |                                        |                                                                       |                                                                 |   |   |   |   |   |   |
| 30 | 550/<br>31                             | Eating/ Drinking                                                      | FIM; Eating                                                     | 8 | 1 | 8 | 2 | 8 | 3 |
| 31 |                                        |                                                                       |                                                                 |   |   |   |   |   |   |
| 32 | 570                                    | Looking after one's health                                            | -                                                               | 8 | 3 | - | - | - | - |
| 33 |                                        |                                                                       |                                                                 |   |   |   |   |   |   |
| 34 | 620                                    | Acquisition of goods and services                                     | Instrumental Activities of Daily Living scale; Shopping         | 8 | 4 | 8 | 3 | 8 | 3 |
| 35 |                                        |                                                                       |                                                                 |   |   |   |   |   |   |
| 36 | 630                                    | Preparing meals                                                       | Instrumental Activities of Daily Living scale; Food preparation | 8 | 2 | 8 | 1 | 8 | 3 |
| 37 |                                        |                                                                       |                                                                 |   |   |   |   |   |   |
| 38 | 640                                    | Doing housework                                                       | Instrumental Activities of Daily Living scale; Housekeeping     | 8 | 4 | 8 | 3 | 8 | 3 |
| 39 |                                        |                                                                       |                                                                 |   |   |   |   |   |   |
| 40 | 710                                    | Basic interpersonal interactions                                      | -                                                               | 8 | 3 | - | - | - | - |
| 41 |                                        |                                                                       |                                                                 |   |   |   |   |   |   |
| 42 | 760                                    | Family relationships                                                  | -                                                               | 8 | 3 | - | - | - | - |
| 43 |                                        |                                                                       |                                                                 |   |   |   |   |   |   |
| 44 | 920                                    | Recreation and leisure                                                | -                                                               | 8 | 2 | - | - | - | - |
| 45 |                                        |                                                                       |                                                                 |   |   |   |   |   |   |
| 46 | 310                                    | Immediate family                                                      | -                                                               | 8 | 3 | - | - | - | - |
| 47 |                                        |                                                                       |                                                                 |   |   |   |   |   |   |
| 48 | 340                                    | Personal care providers and personal assistants                       | -                                                               | 8 | 2 | - | - | - | - |
| 49 |                                        |                                                                       |                                                                 |   |   |   |   |   |   |
| 50 | 355                                    | Health professionals                                                  | -                                                               | 8 | 1 | - | - | - | - |
| 51 |                                        |                                                                       |                                                                 |   |   |   |   |   |   |
| 52 | 410                                    | Individual attitudes of immediate family members                      | -                                                               | 8 | 2 | - | - | - | - |
| 53 |                                        |                                                                       |                                                                 |   |   |   |   |   |   |
| 54 | 575                                    | General social support services,                                      | -                                                               | 8 | 2 | - | - | - | - |
| 55 |                                        |                                                                       |                                                                 |   |   |   |   |   |   |

59  
60

1  
2  
3  
4  
5  
6  
7  
8  
9  
10  
11  
12  
13  
14  
15  
16  
17  
18  
19  
20  
21  
22  
23  
24  
25  
26  
27  
28  
29  
30  
31  
32  
33  
34  
35  
36  
37  
38  
39  
40  
41  
42  
43  
44  
45  
46  
47  
48  
49  
50  
51  
52  
53  
54  
55  
56  
57  
58  
59  
60

|             |                                        |   |   |   |   |   |   |   |
|-------------|----------------------------------------|---|---|---|---|---|---|---|
| 6           | systems, and policies                  |   |   |   |   |   |   |   |
| 7<br>8<br>9 | Health services, systems, and policies | - | 8 | 3 | - | - | - | - |

SpO2, oxygen saturation; NYHA, New York Heart Association; CTR, cardiothoracic ratio; FIM, Functional Independence Measure.

**DISCUSSION**

We have developed a comprehensive assessment for older people with HF based on ICF for widespread use in clinical practice and verified the appropriateness of the scoring method using the RAND Delphi method. In this study, we drew on our literature review and the ICF Reference Guide to link existing assessment batteries for 28 of the 43 ICF categories. In the first Delphi round, 'agreement' was not reached on six questions in the four ICF categories, and the explanation and scoring methods were modified. In the second round of Delphi, all question items of the 43 ICF category were reached a consensus of 'Appropriate' and 'Agreement'.

The purpose of this study was to develop an assessment method that could be used not only by cardiovascular physicians but also by medical professionals: home physicians, care managers, and paramedical professions. Therefore, we adopted a simple evaluation method that requires as little special machinery and environment as possible. For example, although exercise tolerance at b455 has been reported to be a prognostic factor for HF [49], we avoided the cardiopulmonary exercise testing (CPX) and 6-minute walk test, and the specific activity scale (SAS) was chosen instead. [50-54] We selected gait speed and FIM as the existing assessment batteries linked to the d450 walking, but we selected only FIM for simplicity and ease of assessment at the suggestion of the panel members in the second Delphi round. The ICF categories in this study did not include renal function, BNP or anaemia, which are prognostic factors for heart failure.[55] We suggest that these items be added, although the increase in the items may prevent their wide-spread use in the clinical setting, making their clinical use more difficult. In addition, the comprehensive ICF-based assessment of older patients with HF developed in this study did not include personal factors such as age, gender, values, lifestyle, coping strategies and personality.

In recent years, patient-centred interventions have become a principle in the care of chronic diseases [56]. The ESC guidelines similarly recommend patient-centred care [57].

We propose that when using the ICF to share information on older people with HF across

1  
2  
3  
4  
5  
6 344 multiple professions, it is necessary to include not only the 43 ICF categories, but also  
7 345 personal factors.

8 346 In Japan, the establishment of a comprehensive community care system that integrates  
9 347 medical care, welfare, and nursing care is being promoted, but evidence for information  
10 348 sharing is lacking. We expect that the ICF-based assessment method for older patients  
11 349 with HF developed in this study will be widely used in clinical practice.  
12  
13  
14  
15

350

### 351 **Strengths and limitations**

352 Since the purpose of this study was to develop a common community-based evaluation  
353 method for medical and nursing care, we constructed an expert panel related to medical  
354 professions and nursing care professions in Hiroshima prefecture. Since there is no  
355 variation in the regions of the panel members, the existence of selective bias cannot be  
356 denied. Therefore, we suggest that the results of this study should be used with caution  
357 in regions other than Hiroshima prefecture. This study was based on the RAND/UCLA  
358 Delphi method, but face-to-face meetings could not be conducted because of the current  
359 coronavirus pandemic. Therefore, the implementation is not strictly based on the  
360 RAND/UCLS method. We believe that we should have held an online meeting during the  
361 Delphi Round 2. In this study, the Delphi method through expert consensus was used to  
362 clarify the appropriateness of the evaluation method. The shortcomings of the Delphi  
363 method are the possibility of coercion and inducement to gather opinions and the issue  
364 of the validity of the questionnaire. In the future, it will be necessary to clarify the validity  
365 of the evaluation method in survey studies of older patients with heart failure.  
366

367

### 367 **Implications and Future directions**

368 The results of this study have two implications. First, it is the establishment of a  
369 comprehensive assessment method for older patients with HF, which is a social problem  
370 in Japan. Comprehensive multidisciplinary assessment is important to prevent  
371 rehospitalization for HF, and the ICF-based scoring method developed in this study is  
372 expected to prevent rehospitalization. Second, the ICF-based evaluation method allows  
373 for an international comparison of the effectiveness of HF treatment and information  
374 sharing. Wagner proposes a patient-centred model for chronic disease care that utilises  
375 local social resources and information sharing systems such as information and  
376 communication technology (ICT). [58,59] In the future, it is necessary to establish an  
377 information sharing system using a comprehensive assessment method based on the  
378 ICF, and to examine the effect of readmission prevention and differences in life function  
379 according to local policies.  
380

1  
2  
3  
4  
5  
6 380

7 381

8 382 **CONCLUSION**

9 383 We developed a scoring method based on the ICF for older patients with HF and  
10 384 clarified its appropriateness using the RAND/UCLA Delphi method. Future work is  
11 385 required to develop an ICF-based information sharing system and to clarify its impact on  
12 386 the prevention of re-hospitalisation and quality of life in older patients with HF.

13 387

14 388 **Acknowledgements**

15 389 For their contribution to the development of the ICF-based comprehensive assessment  
16 390 for older patients with heart failure, the team would like to acknowledge Dr. Etsushi  
17 391 Akimoto, Dr. Satoshi Ishida, Dr. Futoshi Konishi, Dr. Hideki Nojima, MS Keiko Ishii, MS  
18 392 Kaoru Okazaki, MS Mayumi Ono, MS Eiko Kishikawa, MS Emi Ochibe, MS Shizue  
19 393 Kobayasi, MS Kaori Tikashita, MS Yasue Saitou, MR Hiroshi Sakurashita, MR  
20 394 Nobuyoshi Satou, MS Misuzu Sakai, MR Takayuki Santa, MS Hiromi Shigeoka, MS Yoko  
21 395 Nakasa, MR Tomoaki Honma, MS Kazue Mitinori, MS Midori Motohiro and MS Norie  
22 396 Yoshimoto. This study was conducted as a part of the Hiroshima Heart Health Promotion  
23 397 Project. We would like to thank Editage (www.editage.com) for English language editing.

24 398

25 399 **Contributions**

26 400 All authors meet the criteria for authorship of the ICMJE. SS, TK, TH and HK  
27 401 contributed to the conceptualisation of the study. SS, NG, HF, SN, YT, NM, KK, MN  
28 402 and MY were responsible for designing the questionnaire and collecting and analysing  
29 403 the data. MN, MY, MM, HO and YY were responsible for recruiting the study  
30 404 participants. YN, YK and HK were responsible for interpreting the results and managing  
31 405 the project. SS and HK supervised all research activities. All authors reviewed the  
32 406 current draft and approved the final current submission.

33 407

34 408 **Funding**

35 409 This work was supported by the MHLW Comprehensive Research on Statistical  
36 410 Information Program, Grant Number JPMH20AB1002.

37 411

38 412 **Competing interests**

39 413 The authors declare that there are no conflicts of interest regarding the publication of  
40 414 this paper.

41 415

1  
2  
3  
4  
5  
6  
7  
8  
9  
10  
11  
12  
13  
14  
15  
16  
17  
18  
19  
20  
21  
22  
23  
24  
25  
26  
27  
28  
29  
30  
31  
32  
33  
34  
35  
36  
37  
38  
39  
40  
41  
42  
43  
44  
45  
46  
47  
48  
49  
50  
51  
52  
53  
54  
55  
56  
57  
58  
59  
60

416 **Ethics approval**

417 The study was approved by the Hiroshima University of Epidemiological Research  
418 Ethics Review Board (approval number: E-2217).

419

420 **Provenance and peer review**

421 Not commissioned; externally peer reviewed.

422

423 **Data availability statement**

424 No additional data available.

425

426 **Open access**

427 This is an open access article distributed in accordance with the Creative Commons  
428 Attribution Non-Commercial (CC BY-NC 4.0) licence, which permits others to distribute,  
429 remix, adapt, build upon this work non-commercially, and licence their derivative works  
430 on different terms, provided the original work is properly cited, appropriate credit is given,  
431 any changes made indicated, and the use is non-commercial.  
432 See <http://creativecommons.org/licenses/by-nc/4.0/>.

433

434 **ORCID iD**

435 Shigehito Shota <https://orcid.org/0000-0001-7186-2327>

436

437

438



439 **References**

- 440 1 Ministry of Health Labour and Welfare. Vital statistics of JAPAN.  
441 <https://www.mhlw.go.jp/toukei/saikin/hw/jinkou/houkoku18/dl/all.pdf> (Accessed 19 Oct  
442 2021) 2018 [in Japanese].
- 443 2 Ministry of Health Labour and Welfare. *Comprehensive survey of living*  
444 *Conditions 2019*. [in Japanese].  
445 <https://www.mhlw.go.jp/toukei/saikin/hw/k-tyosa/k-tyosa19/dl/14.pdf>. Accessed 19  
446 October 2021.
- 447 3 Ministry of Health Labour and Welfare. Estimates of national medical care  
448 Expenditure 2017. [in Japanese]. <https://www.mhlw.go.jp/toukei/saikin/hw/k-iryohi/17/dl/data.pdf> (Accessed 19 Oct 2021).
- 449 4 Ministry of Health Labour and Welfare, Japan. *The Japanese national plan for*  
450 *promotion of measures against cerebrovascular and cardiovascular disease* [in  
451 Japanese] published 2020.
- 452 5 Kuwabara M, Mori M, Komoto S. Japanese national plan for promotion of  
453 measures against cerebrovascular and cardiovascular disease. *Circulation*  
454 2021;**143**:1929–31. doi: [10.1161/CIRCULATIONAHA.120.052737](https://doi.org/10.1161/CIRCULATIONAHA.120.052737). (Epub 17 May 2021).
- 455 6 Okura Y, Ramadan MM, Ohno Y, et al. Impending epidemic: future projection  
456 of heart failure in Japan to the year 2055. *Circ J* 2008;**72**:489–91.  
457 <https://doi.org/10.1253/circj.72.489>.
- 458 7 Yasuda S, Miyamoto Y, Ogawa H. Current status of cardiovascular medicine  
459 in the aging society of Japan. *Circulation* 2018;**138**:965–7.  
460 <https://doi.org/10.1161/CIRCULATIONAHA.118.035858>.
- 461 8 Nieminen MS, Dickstein K, Fonseca C, et al. The patient perspective: quality of  
462 life in advanced heart failure with frequent hospitalisations. *Int J Cardiol* 2015;**191**:256–  
463 64. doi: [10.1016/j.ijcard.2015.04.235](https://doi.org/10.1016/j.ijcard.2015.04.235).
- 464 9 Lewis EF, Claggett BL, McMurray JJV et al. Health-related quality of life  
465 outcomes in PARADIGM-HF. *Circ Heart Fail* 2017;**10**:e003430. doi:  
466 [10.1161/CIRCHEARTFAILURE.116.003430](https://doi.org/10.1161/CIRCHEARTFAILURE.116.003430).
- 467 10 Lee H, Oh SH, Cho H et al. Prevalence and socio-economic burden of heart  
468 failure in an aging society of South Korea. *BMC Cardiovasc Disord* 2016;**16**:215. doi:  
469 [10.1186/s12872-016-0404-2](https://doi.org/10.1186/s12872-016-0404-2).
- 470 11 Tsuchihashi M, Tsutsui H, Kodama K et al. Medical and socioenvironmental  
471 predictors of hospital readmission in patients with congestive heart failure. *Am Heart J*  
472 2001;**142**:E7.
- 473 12 Hernandez AF, Hammill BG, O'Connor CM et al. Clinical effectiveness of beta-

- 1  
2  
3  
4  
5  
6 475 blockers in heart failure: findings from the OPTIMIZE-HF (Organized Program to Initiate  
7 476 Lifesaving Treatment in Hospitalized Patients with Heart Failure) Registry. *J Am Coll*  
8 477 *Cardiol* 2009;**53**:184–92.
- 9  
10 478 13 Benjamin EJ, Muntner P, Alonso A et al. Update Heart Disease and Stroke  
11 479 Statistics-2019 Update: A Report from the American Heart Association. *Circulation*  
12 480 2019;**139**:e56–e528.
- 13  
14 481 14 Huynh QL, Negishi K, Blizzard L, et al. “Mild cognitive impairment predicts death  
15 482 and readmission within 30 days of discharge for heart failure.” *Int J Cardiol*  
16 483 2016;**221**:212–7.
- 17  
18 484 15 O’Connor CM, Hasselblad V, Mehta RH, et al. “Triage after hospitalization with  
19 485 advanced heart failure: the ESCAPE (Evaluation Study of Congestive Heart Failure and  
20 486 Pulmonary Artery Catheterization Effectiveness) risk model and discharge score.” *J Am*  
21 487 *Coll Cardiol* 2010, Mar 2;**55**:872–8.
- 22  
23 488 16 Lo AX, Donnelly JP, McGwin G Jr, et al. “Impact of gait speed and instrumental  
24 489 activities of daily living on all-cause mortality in adults ≥65 years with heart failure.” *Am*  
25 490 *J Cardiol* Mar 15 2015;**115**:797–801.
- 26  
27 491 17 Takabayashi K, Kitaguchi S, Iwatsu K, et al. “A decline in activities of daily living  
28 492 due to acute heart failure is an independent risk factor of hospitalization for heart failure  
29 493 and mortality.” *J Cardiol* 2019;**73**:522–9.
- 30  
31 494 18 Löfvenmark C, Mattiasson AC, Billing E et al. “Perceived loneliness and social  
32 495 support in patients with chronic heart failure.” *Eur J Cardiovasc Nurs* 2009;**8**:251–8.
- 33  
34 496 19 Tsutsui H, Ide T, Ito H; et al. JCS/JHFS 2021 guideline focused update on  
35 497 diagnosis and treatment of acute and chronic heart failure. *Circ J* 2021.  
36 498 doi:[10.1253/circj.CJ-21-0431](https://doi.org/10.1253/circj.CJ-21-0431).
- 37  
38 499 20 Sokoreli I, Cleland JG, Pauws SC, et al. Added value of frailty and social support  
39 500 in predicting risk of 30-day unplanned re-admission or death for patients with heart  
40 501 failure: an analysis from OPERA-HF. *Int J Cardiol* 2019;**278**:167–72.  
41 502 <https://doi.org/10.1016/j.ijcard.2018.12.030>.
- 42  
43 503 21 Bradley EH, Curry L, Horwitz LI, et al. Hospital strategies associated with 30-  
44 504 day readmission rates for patients with heart failure. *Circ Cardiovasc Qual Outcomes*  
45 505 2013;**6**:444–50.
- 46  
47 506 22 Japan Heart Failure Society Guidelines Committee. Statement on the  
48 507 treatment of elderly heart failure patients.  
49 508 [http://www.asas.or.jp/jhfs/pdf/Statement\\_HeartFailurel.pdf](http://www.asas.or.jp/jhfs/pdf/Statement_HeartFailurel.pdf) (Accessed 19 Nov 2021)  
50 509 2016.
- 51  
52 510 23 World Health Organization. *ICF International classification of functioning,*  
53  
54  
55  
56  
57  
58  
59  
60

- 1  
2  
3  
4  
5  
6 511 *disability and health*. Geneva: WHO. 2001.
- 7 512 24 Maribo T, Petersen KS, Handberg C, et al. Systematic literature review on ICF from  
8 513 2001 to 2013 in the Nordic countries focusing on clinical and rehabilitation context. *J Clin*  
9 514 *Med Res* 2016;**8**:1–9.
- 10 515 25 Okochi J, Utsunomiya S, Takahashi T. Health measurement using the ICF: Test-  
11 516 retest reliability study of ICF codes and qualifiers in geriatric care. *Health Qual Life*  
12 517 *Outcomes* 2005; 3: 46.
- 13 518 26 Uhlig T, Lillemo S, Moe RH, et al. Reliability of the ICF Core Set for rheumatoid  
14 519 arthritis. *Ann Rheum Dis* 2007; 66: 1078–84.
- 15 520 27 Starrost K, Geyh S, Trautwein A, et al. Interrater reliability of the extended ICF Core  
16 521 Set for stroke applied by physiotherapists. *Phys Ther* 2008, 88: 841–51.
- 17 522 28 Hilfiker R, Orbist S, Christen G, et al. The use of the comprehensive International  
18 523 Classification of Functioning, Disability and Health Core Set for low back pain in clinical  
19 524 practice: a reliability study. *Physiother Res Int* 2009; 14: 147–66
- 20 525 29 Selb M, Escorpizo R, Kostanjsek N, et al. A guide on how to develop an  
21 526 International Classification of Functioning, Disability and Health Core Set. *Eur J Phys*  
22 527 *Rehabil Med* 2015 Feb;**51**(1):105-17.
- 23 528 30 Cieza A, Geyh S, Chatterji S, et al. ICF linking rules: an update based on lessons  
24 529 learned. *J Rehabil Med* 2005 Jul;**37**:212–8. doi: [10.1080/16501970510040263](https://doi.org/10.1080/16501970510040263).
- 25 530 31 Cieza A, Fayed N, Bickenbach J, et al. Refinements of the ICF Linking Rules to  
26 531 strengthen their potential for establishing comparability of health information. *Disabil*  
27 532 *Rehabil* 2019 Mar;**41**:574–83. doi: [10.3109/09638288.2016.1145258](https://doi.org/10.3109/09638288.2016.1145258). (Epub 17 Mar  
28 533 2016).
- 29 534 32 Cieza A, Stucki A, Geyh S, et al. ICF Core Sets for chronic ischaemic heart disease.  
30 535 *J Rehabil Med* 2004 Jul;**(44** Suppl):94-9. doi: [10.1080/16501960410016785](https://doi.org/10.1080/16501960410016785).
- 31 536 33 Sophie L W Spoorenberg SLW, Reijneveld SA, Middel B, et al. The Geriatric ICF  
32 537 Core Set reflecting health-related problems in community-living older adults aged 75  
33 538 years and older without dementia: development and validation. *Disabil Rehabil*  
34 539 2015;**37**(25):2337–43. doi: [10.3109/09638288.2015.1024337](https://doi.org/10.3109/09638288.2015.1024337).
- 35 540 34 Shiota S, Naka M, Kitagawa T, et al. Selection of comprehensive assessment  
36 541 categories based on the international classification of functioning, disability, and health  
37 542 for elderly patients with heart failure: A Delphi survey among registered instructors of  
38 543 cardiac rehabilitation. *Occup Ther Int* 2021 Jun 25;**2021**:6666203. doi:  
39 544 [10.1155/2021/6666203](https://doi.org/10.1155/2021/6666203). eCollection 2021.
- 40 545 35 Shiota S, Kitagawa T, Hidaka T, et al. The international classification of  
41 546 functioning, disabilities, and health categories necessary for care planning for older

- 1  
2  
3  
4  
5  
6 547 patients with heart failure: A survey of care managers in Japan. *BMC Geriatr*. 2021 Dec  
7 548 15;21(1):704. doi: 10.1186/s12877-021-02647-3.
- 8  
9 549 36 Fitch K, Bernstein SJ, Aguilar MD, et al. The Rand/UCLA appropriateness method  
10 550 user's manual. Santa Monica: RAND 2001.
- 11  
12 551 37 Toshiro K, Takayuki H, Makiko N, et al. Current medical and social issues for  
13 552 hospitalized heart failure patients in Japan and factors for improving their outcomes -  
14 553 insights from the REAL-HF registry. *Circ Rep*. 2020 Mar;14:226–34. doi:  
15 554 [10.1253/circrep.CR-20-0011](https://doi.org/10.1253/circrep.CR-20-0011).
- 16  
17 555 38 Mukaino M, Proding B, Yamada S, et al. Supporting the clinical use of the ICF  
18 556 in Japan - development of the Japanese version of the simple, intuitive descriptions for  
19 557 the ICF Generic-30 set, its operationalization through a rating reference guide, and  
20 558 interrater reliability study. *BMC Health Serv Res* 2020 Jan 30;20:66. doi:  
21 559 [10.1186/s12913-020-4911-6](https://doi.org/10.1186/s12913-020-4911-6).
- 22  
23 560 39 Senju Y, Mukaino M, Proding B, et al. Development of a clinical tool for rating  
24 561 the body function categories of the ICF generic-30/rehabilitation set in Japanese  
25 562 rehabilitation practice and examination of its interrater reliability. *BMC Med Res Methodol*  
26 563 2021 Jun 14;21:121. doi: [10.1186/s12874-021-01302-0](https://doi.org/10.1186/s12874-021-01302-0).
- 27  
28 564 40 Proding B, O'Connor RJ, Stucki G et al. Establishing score equivalence of the  
29 565 Functional Independence Measure motor scale and the Barthel index, utilising the  
30 566 International Classification of Functioning, Disability and Health and Rasch  
31 567 measurement theory. *J Rehabil Med* 2017 May 16;49:416–22. doi: [10.2340/16501977-  
32 568 2225](https://doi.org/10.2340/16501977-2225).
- 33  
34 569 41 Bladh S, Nilsson MH, Carlsson G et al. Content analysis of 4 fear of falling  
35 570 rating scales by linking to the international classification of functioning, disability and  
36 571 health. *PM&R* 2013 Jul;5:573–582.e1. doi: [10.1016/j.pmrj.2013.01.006](https://doi.org/10.1016/j.pmrj.2013.01.006).
- 37  
38 572 42 Milman N, Annelies Boonen, Peter A Merkel. et al. Mapping of the outcome  
39 573 measures in rheumatology core set for antineutrophil cytoplasmic antibody-associated  
40 574 vasculitis to the International Classification of Function, Disability and Health. *Arthritis  
41 575 Care Res (Hoboken)*. 2015 Feb;67:255–63. doi: 10.1002/acr.22414. PMID: 25048363.
- 42  
43 576 43 Hoang-Kim A, Schemitsch E, Abhaya V. Methodological challenges in the use  
44 577 of hip-specific composite outcomes: linking measurements from hip fracture trials to the  
45 578 International Classification of Functioning, Disability and Health Framework. *Arch Orthop  
46 579 Trauma Surg* 2014;134:219–28. DOI [10.1007/s00402-013-1824-4](https://doi.org/10.1007/s00402-013-1824-4)
- 47  
48 580 44 Cieza A, Stucki G. Content comparison of health-related quality of life (HRQOL)  
49 581 instruments based on the international classification of functioning, disability and health  
50 582 (ICF). *Qual Life Res* 2005 Jun;14:1225–37. doi: [10.1007/s11136-004-4773-0](https://doi.org/10.1007/s11136-004-4773-0).
- 51  
52  
53  
54  
55  
56  
57  
58  
59  
60

- 1  
2  
3  
4  
5  
6 583 45 Cieza A, Hilfiker R, Boonen A, et al. Items from patient-oriented instruments can  
7 584 be integrated into interval scales to operationalize categories of the International  
8 585 Classification of Functioning, Disability and Health. *J Clin Epidemiol* 2009 Sep;62(9):912-  
9 586 21, 921.e1-3. doi: 10.1016/j.jclinepi.2008.04.011.
- 11 587 46 Darzins SW, Imms C, Di Stefano M. Measurement of activity limitations and  
12 588 participation restrictions: examination of ICF-linked content and scale properties of the  
13 589 FIM and PC-PART instruments. *Disabil Rehabil* 2017 May;39:1025–38. doi:  
14 590 [10.3109/09638288.2016.1172670](https://doi.org/10.3109/09638288.2016.1172670). (Epub 20 May 2016).
- 16 591 47 Prodinge B, Stucki G, Coenen M. et al. The measurement of functioning using  
17 592 the International Classification of Functioning, Disability and Health: comparing qualifier  
18 593 ratings with existing health status instruments. *Disabil Rehabil* 2019 Mar;41:541–8. doi:  
19 594 [10.1080/09638288.2017.1381186](https://doi.org/10.1080/09638288.2017.1381186). (Epub 8 Oct 2017).
- 21 595 48 Giardini A, Vitacca M, Pedretti R. et al. Linking the ICF codes to clinical real-  
22 596 life assessments: the challenge of the transition from theory to practice. *G Ital Med Lav*  
23 597 *Ergon* 2019 May;41:78–104. PMID: [31170337](https://pubmed.ncbi.nlm.nih.gov/31170337/) [in Italian].
- 25 598 49 JCS/JACR. Guideline on rehabilitation in patients with cardiovascular disease.  
26 599 [https://www.j-circ.or.jp/cms/wp-content/uploads/2021/03/JCS2021\\_Makita.pdf](https://www.j-circ.or.jp/cms/wp-content/uploads/2021/03/JCS2021_Makita.pdf)  
27 600 (Accessed 19 Nov 2021) 2021.
- 29 601 50 Mancini DM, Eisen H, Kussmaul W, et al. Value of peak exercise oxygen  
30 602 consumption for optimal timing of cardiac transplantation in ambulatory patients with  
31 603 heart failure. *Circulation* 1991;83:778–86.
- 33 604 51 Keteyian SJ, Patel M, Kraus WE, et al. Variables measured during  
34 605 cardiopulmonary exercise testing as predictors of mortality in chronic systolic heart  
35 606 failure. *J Am Coll Cardiol* 2016;67:780–9. PMID: [26892413](https://pubmed.ncbi.nlm.nih.gov/26892413/).
- 37 607 52 Nakanishi M, Takaki H, Kumasaka R, et al. Targeting of high peak respiratory  
38 608 exchange ratio is safe and enhances the prognostic power of peak oxygen uptake for  
39 609 heart failure patients. *Circ J* 2014 Aug 25;78:2268–75. doi: [10.1253/circj.cj-14-0047](https://doi.org/10.1253/circj.cj-14-0047),  
40 610 PMID: [25056425](https://pubmed.ncbi.nlm.nih.gov/25056425/).
- 42 611 53 ATS Committee on Proficiency Standards for Clinical Pulmonary Function  
43 612 Laboratories. ATS statement: guidelines for the six-minute walk test. *Am J Respir Crit*  
44 613 *Care Med* 2002;166:111–7. PMID: [12091180](https://pubmed.ncbi.nlm.nih.gov/12091180/).
- 46 614 54 Goldman L, Hashimoto B, Cook EF, et al. Comparative reproducibility and  
47 615 validity of systems for assessing cardiovascular functional class: advantages of a new  
48 616 specific activity scale. *Circulation* 1981;64:1227–34. PMID: [7296795](https://pubmed.ncbi.nlm.nih.gov/7296795/).

- 1  
2  
3  
4  
5  
6 617 55 Guidelines for diagnosis and treatment of acute and chronic heart failure  
7 618 (JCS 2017/JHFS 2017) . [https://www.mhlw.go.jp/file/05-Shingikai-10901000-](https://www.mhlw.go.jp/file/05-Shingikai-10901000-Kenkoukyoku-Soumuka/0000202651.pdf)  
8 619 [Kenkoukyoku-Soumuka/0000202651.pdf](https://www.mhlw.go.jp/file/05-Shingikai-10901000-Kenkoukyoku-Soumuka/0000202651.pdf) (Accessed 19 Nov 2021) 2018.  
9  
10 620 56 Wagner EH, Bennett SM, Austin BT et al. Finding common ground: patient-  
11 621 centeredness and evidence-based chronic illness care. *J Altern Complement Med*  
12 622 2005;**11**;Supplement 1:S7–SS15. doi: [10.1089/acm.2005.11.s-7](https://doi.org/10.1089/acm.2005.11.s-7).  
13  
14 623 57 McDonagh TA, Metra M, Adamo M et al. 2021 ESC Guidelines for the  
15 624 diagnosis and treatment of acute and chronic heart failure. *Eur Heart J* 2021;**42**:3599–  
16 625 726. doi: [10.1093/eurheartj/ehab368](https://doi.org/10.1093/eurheartj/ehab368).  
17  
18 626 58 Wagner EH. More than a case manager. *Ann Intern Med* 1998;**129**:654–6.  
19  
20 627 59 Wagner EH, Austin BT, Davis C et al. Improving chronic illness care:  
21 628 translating evidence into action. *Health Aff (Millwood)* 2001;**20**:64–78.  
22  
23 629  
24  
25  
26  
27  
28  
29  
30  
31  
32  
33  
34  
35  
36  
37  
38  
39  
40  
41  
42  
43  
44  
45  
46  
47  
48  
49  
50  
51  
52  
53  
54  
55  
56  
57  
58  
59  
60

1  
2  
3  
4  
5  
6 630 **Figure Legends**  
7

8 631 Fig. 1: Development of Questionnaire and Delphi process flow  
9

10  
11 632

12  
13 633 Fig. 2: Selection of records and process flow diagrams  
14

15  
16 634  
17  
18  
19  
20  
21  
22  
23  
24  
25  
26  
27  
28  
29  
30  
31  
32  
33  
34  
35  
36  
37  
38  
39  
40  
41  
42  
43  
44  
45  
46  
47  
48  
49  
50  
51  
52  
53  
54  
55  
56  
57  
58  
59  
60

For peer review only

### Development of the questionnaire

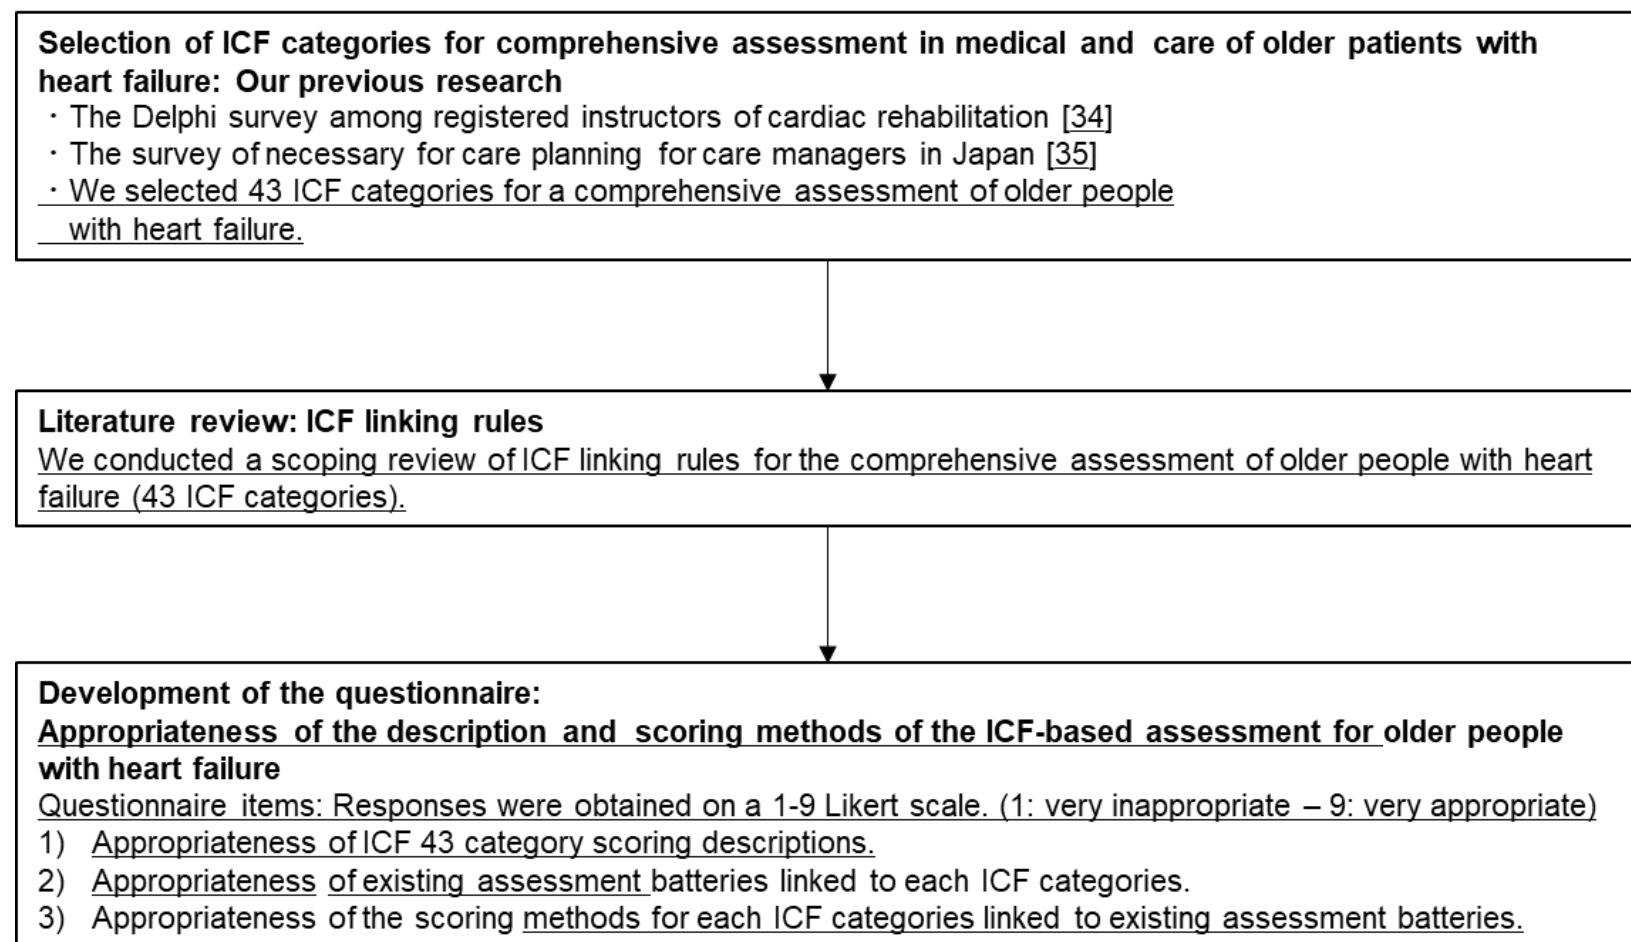

### Delphi approach

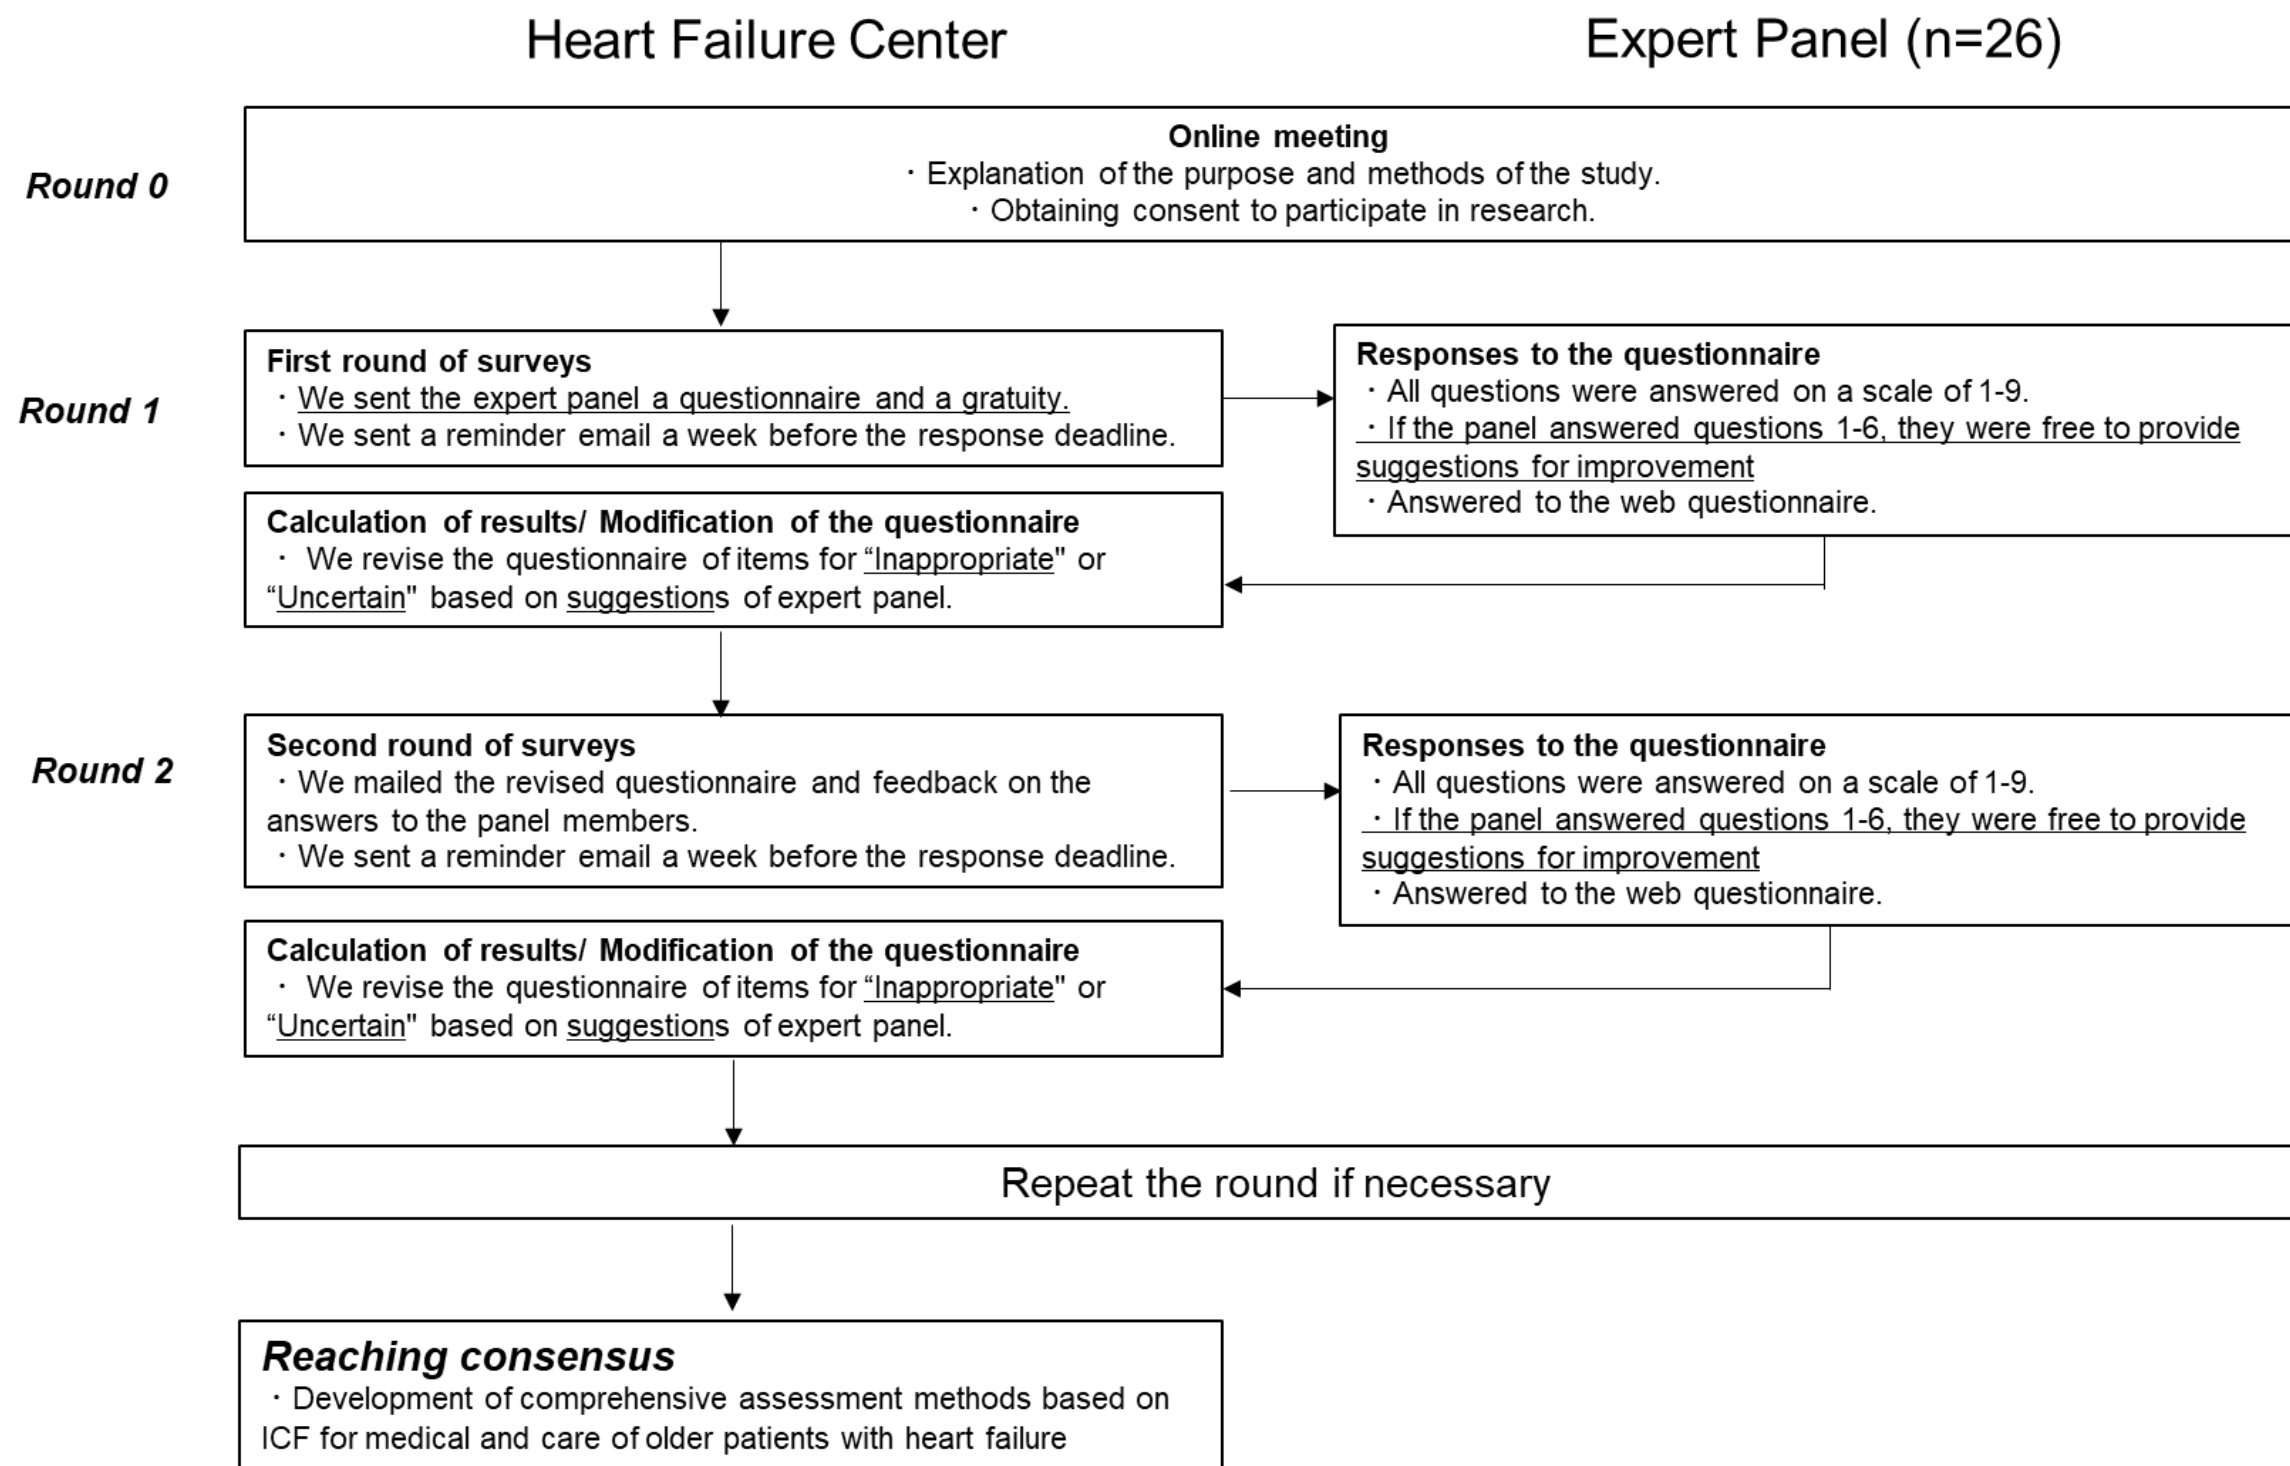





## Supplemental materials 1

### Questionnaire

**“For each ICF category, please indicate on a scale of 1 (very inappropriate) to 9 (very appropriate) the appropriateness of the following three questions.**

**(1-3: not appropriate, 4-6: undecided, 7-9: appropriate)”**

#### Questionnaire items

- 1) Appropriateness of ICF 43 category scoring descriptions.
- 2) Appropriateness of existing assessment batteries linked to each ICF categories.
- 3) Appropriateness of the scoring methods for each ICF categories linked to existing assessment.

**b110: Consciousness function**

General mental functions of the state of awareness and alertness, including the clarity and continuity of the wakeful state.

*Inclusions: functions of the state, continuity, and quality of consciousness; loss of consciousness; coma, vegetative states, fugues, trance states, possession states, drug-induced altered consciousness, delirium, stupor*

*Exclusions: orientation functions ([b114](#)); energy and drive functions ([b130](#)); sleep functions ([b134](#))*

**1) Appropriateness of b110: consciousness function scoring descriptions.****Ratings**

0 No problem

1 Mild problem: May include problems with consciousness functions that do not affect the patient's daily activities.

2 Moderate problem: May include a problem with consciousness functions that exceeds 1, but remains a relatively minor problem (<50%).

3 Severe problem: May include a major problem ( $\geq 50\%$ ) in consciousness functions.

4 Complete problem: May include a complete problem with consciousness functions, such as coma.

**Answer: Please tick the number that best applies**

| Very inappropriate |   |   |   |   |   |   | Very appropriate |   |
|--------------------|---|---|---|---|---|---|------------------|---|
| 1                  | 2 | 3 | 4 | 5 | 6 | 7 | 8                | 9 |

**2) Appropriateness of existing assessment batteries linked to b110: consciousness function****Existing assessment battery linked to b110 consciousness function: Japan Coma Scale****Japan Coma Scale**

JCS0 (alert)

JCS I (not fully alert but awake without any stimuli)

1: Almost clear consciousness, but not clear.

2: Disorientation (not knowing places, times or dates)

3: Cannot say his/her name or date of birth

JCS II (arousable with stimulation)

1  
2  
3  
4  
5  
6 10: Easy eye-opening with a normal call.

7 20: Eyes open with loud voice or body shaking

8 30: Eyes open by repeated calls with pain stimulus.

9  
10 JCSIII(unarousable)

11 100: Movement to repel the pain stimulus.

12 200: Slight limb movement or frowning in response to the pain stimulus

13 300: Does not respond to pain stimulus

14  
15  
16 **[Reference]**

17 1. Ohta T, Waga S, Handa W, et al. New grading of level of disordered consciousness (author's  
18 transl). No shinkei geka. Neurol Surg 1974;2:623–7.

19 2. Ohta T, Kikuchi H, Hashi K, et al. Nizofenone administration in the acute stage following  
20 subarachnoid hemorrhage. Results of a multi-center controlled double-blind clinical study. J  
21 Neurosurg 1986;64:420–6.

22 3. Shigemori M, Abe T, Aruga T, et al. Guidelines for the Management of Severe Head Injury,  
23 2nd edition guidelines from the Guidelines Committee on the Management of Severe Head  
24 Injury, the Japan Society of Neurotraumatology. Neurol Med Chir 2012;52:1–30

25  
26  
27  
28  
29  
30  
31 **Answer: Please tick the number that best applies**

| Very inappropriate |   |   |   |   | Very appropriate |   |   |   |  |
|--------------------|---|---|---|---|------------------|---|---|---|--|
| 1                  | 2 | 3 | 4 | 5 | 6                | 7 | 8 | 9 |  |

32  
33  
34  
35  
36  
37 **3) Appropriateness of the scoring methods for b110 consciousness function linked to**  
38 **Japan Coma Scale.**

39  
40  
41 **Ratings**

42 0 No problem: JCS 0

43 1 Mild problem: JCS I -1 ~ JCS I -3

44 2 Moderate problem: JCS II -10 ~ JCS II -30

45 3 Severe problem: JCSIII-100 ~ JCSIII-200

46 4 Complete problem: JCSIII-300

47  
48  
49  
50  
51  
52 **Answer: Please tick the number that best applies**

| Very inappropriate |   |   |   |   | Very appropriate |   |   |   |  |
|--------------------|---|---|---|---|------------------|---|---|---|--|
| 1                  | 2 | 3 | 4 | 5 | 6                | 7 | 8 | 9 |  |

**b114: Orientation functions**

General mental functions of knowing and ascertaining one's relation to time, to place, to self, to others, to objects, and to space.

*Inclusions: functions of orientation to time, place and person; orientation to self and others; disorientation to time, place, and person*

*Exclusions: consciousness functions ([b110](#)); attention functions ([b140](#)); memory functions ([b144](#))*

**1) Appropriateness of b114: Orientation functions scoring descriptions.****Ratings**

0 No problem

1 Mild problem: May include problems with orientation functions that do not affect the patient's daily activities.

2 Moderate problem: May include a problem with orientation functions that exceeds 1, but remains a relatively minor problem (<50%).

3 Severe problem: May include a major problem ( $\geq 50\%$ ) in orientation functions.

4 Complete problem: May include a complete problem with orientation functions.

**Answer: Please tick the number that best applies**

| Very inappropriate |   |   |   |   | Very appropriate |   |   |   |  |
|--------------------|---|---|---|---|------------------|---|---|---|--|
| 1                  | 2 | 3 | 4 | 5 | 6                | 7 | 8 | 9 |  |

**2) Appropriateness of existing assessment batteries linked to b114: Orientation functions****Existing assessment battery linked to b114: Orientation functions: Mini-Mental State Examination****Mini-Mental State Examination**

Orientation: time

Year, Month, Day, Date, Time: \_\_\_/5

Orientation: place

Country, Town, District, Hospital, Ward: \_\_\_/5

**[Reference]**

1. Folstein MF, Folstein SE, McHugh PR. Mini-mental state. A practical method for grading the cognitive state of patients for the clinician. J. Psychiatry Res. 1975; 12: 189–198.

**Answer: Please tick the number that best applies**

| Very inappropriate |   |   |   |   | Very appropriate |   |   |   |
|--------------------|---|---|---|---|------------------|---|---|---|
| 1                  | 2 | 3 | 4 | 5 | 6                | 7 | 8 | 9 |

**3) Appropriateness of the scoring methods for b114: Orientation functions linked to Mini-Mental State Examination**

**Ratings**

- 0 No problem: MMSE; orientation score 5 (Adopt low scores of time or place)
- 1 Mild problem: MMSE; orientation score 4 (Adopt low scores of time or place)
- 2 Moderate problem: MMSE; orientation score 3 (Adopt low scores of time or place)
- 3 Severe problem: MMSE; orientation score 2 (Adopt low scores of time or place)
- 4 Complete problem: MMSE; orientation score 1-0 (Adopt low scores of time or place)

**Answer: Please tick the number that best applies**

| Very inappropriate |   |   |   |   | Very appropriate |   |   |   |
|--------------------|---|---|---|---|------------------|---|---|---|
| 1                  | 2 | 3 | 4 | 5 | 6                | 7 | 8 | 9 |

[Reference]

Vriendt PD, Gorus E, Bautmans I, et al. Conversion of the Mini-Mental State Examination to the International Classification of Functioning, Disability and Health terminology and scoring system. *Gerontology*. 2012;58(2):112-9. doi: 10.1159/000330088.

**b130 Energy and drive functions** (Mental functions that cause self-driven activities in daily life.)

General mental functions of physiological and psychological mechanisms that cause the individual to move towards satisfy specific needs and general goals in a persistent manner.

*Inclusions: functions of energy level, motivation, appetites, craving (including craving for substances that can be abused), and impulse control*

*Exclusions: consciousness functions (b110); temperament and personality functions (b126); sleep functions (b134); psychomotor functions (b147); emotional functions (b152)*

**1) Appropriateness of b130 Energy and drive functions.**

**Ratings**

0 No problem

1 Mild problem: May include problems with energy and drive functions that do not affect the patient's daily activities.

2 Moderate problem: May include a problem with energy and drive functions that exceeds 1, but remains a relatively minor problem (<50%).

3 Severe problem: May include a major problem ( $\geq 50\%$ ) in energy and drive functions.

4 Complete problem: May include a complete problem with energy and drive functions, such as having no motivation or appetite any time.

**Answer: Please tick the number that best applies**

|                    |   |   |   |   |   |   |   |   |                  |  |
|--------------------|---|---|---|---|---|---|---|---|------------------|--|
| Very inappropriate |   |   |   |   |   |   |   |   | Very appropriate |  |
| 1                  | 2 | 3 | 4 | 5 | 6 | 7 | 8 | 9 |                  |  |

**2) Appropriateness of existing assessment batteries linked to b130 Energy and drive functions**

**Existing assessment battery linked to b130 Energy and drive functions: Vitality Index**

**Vitality Index**

|                                                                     |   |
|---------------------------------------------------------------------|---|
| <b>1. Wake up</b>                                                   |   |
| Always waking up on time.                                           | 2 |
| Sometimes they don't wake up unless you wake them up.               | 1 |
| They never wake up on their own.                                    | 0 |
| <b>2. Communication</b>                                             |   |
| Greet and talk to them yourself.                                    | 2 |
| Responding to greetings and calls for help and smiles are observed. | 1 |

|                                                                                                     |     |
|-----------------------------------------------------------------------------------------------------|-----|
| No response.                                                                                        | 0   |
| <b>3. Feeding</b>                                                                                   |     |
| Willing to eat on their own initiative                                                              | 2   |
| Attempts to eat when prompted                                                                       | 1   |
| Lack of interest in eating, unwilling to eat at all                                                 | 0   |
| <b>4. On and Off Toilet</b>                                                                         |     |
| Always communicate bowel movements and urination on their own, or urinate and defecate on their own | 2   |
| Occasional urinary and bowel movements.                                                             | 1   |
| No interest in excretion at all.                                                                    | 0   |
| <b>5. Rehabilitation, Activity</b>                                                                  |     |
| Go to rehabilitation on their own and seek out activities.                                          | 2   |
| Participate in rehabilitation and activities when prompted                                          | 1   |
| Rejection, indifference.                                                                            | 0   |
| Total                                                                                               | /10 |

**[Reference]**

1. Kenji Toba, Ryuhei Nakai, Masahiro Akishita et al: Vitality Index as a useful tool to assess elderly with dementia. Geriatr Gerontol Int 2002; 2: 23-9.

**Answer: Please tick the number that best applies**

|                    |   |   |   |   |   |   |   |                  |
|--------------------|---|---|---|---|---|---|---|------------------|
| Very inappropriate |   |   |   |   |   |   |   | Very appropriate |
| 1                  | 2 | 3 | 4 | 5 | 6 | 7 | 8 | 9                |

**3) Appropriateness of the scoring methods for b130 Energy and drive functions linked to Vitality Index****Ratings**

0 No problem: Vitality Index; Total 10

1 Mild problem: Vitality Index; Total 9-7

2 Moderate problem: Vitality Index; Total 6-4

3 Severe problem: Vitality Index; Total 3-1

4 Complete problem: Vitality Index; Total 0

**Answer: Please tick the number that best applies**

|                    |   |   |   |   |   |   |   |                  |
|--------------------|---|---|---|---|---|---|---|------------------|
| Very inappropriate |   |   |   |   |   |   |   | Very appropriate |
| 1                  | 2 | 3 | 4 | 5 | 6 | 7 | 8 | 9                |



**b134 Sleep functions** (Extent and frequency of the problem, such as shortage of sleep or irregular sleep schedules)

General mental functions of periodic, reversible and selective physical and mental disengagement from one's immediate environment accompanied by characteristic physiological changes.

*Exclusions: Attention functions (b140), Consciousness functions (b110), Energy and drive functions (b130), Psychomotor functions (b147)*

### 1) Appropriateness of b134 Sleep functions.

#### Ratings

0 No problem

1 Mild problem: May include problems with sleep that do not affect the patient's daily activities.

2 Moderate problem: May include a problem with sleep that exceeds 1, but remains a relatively minor problem (<50%).

3 Severe problem: May include a major problem ( $\geq 50\%$ ) in sleep.

4 Complete problem: May include a complete problem with sleep, such as being incapable of sleeping, or a complete day–night reversal every day.

#### Answer: Please tick the number that best applies

|                    |   |   |   |   |   |   |   |   |                  |
|--------------------|---|---|---|---|---|---|---|---|------------------|
| Very inappropriate |   |   |   |   |   |   |   |   | Very appropriate |
| 1                  | 2 | 3 | 4 | 5 | 6 | 7 | 8 | 9 |                  |

### 2) Appropriateness of existing assessment batteries linked to b134 Sleep functions.

#### Existing assessment battery linked to b134 Sleep functions: Pittsburgh Sleep Quality Index

Prepared with reference to the Pittsburgh Sleep Quality Index.

|                                                                                                                                                                     |   |
|---------------------------------------------------------------------------------------------------------------------------------------------------------------------|---|
| <b>1. Amount of sleep: During the past month, how hours of actual sleep did you get at night? (This may be different than the number of hours you spent in bed)</b> |   |
| Over 7 hours                                                                                                                                                        | 0 |
| 6-7 hours                                                                                                                                                           | 1 |
| 5-6 hours                                                                                                                                                           | 2 |
| Less than 5 hours                                                                                                                                                   | 3 |
| <b>2. Onset of sleep: During the past month, how often have you had trouble sleeping because you cannot get to sleep within 30 minutes</b>                          |   |

|                                                                                                                                                                |   |
|----------------------------------------------------------------------------------------------------------------------------------------------------------------|---|
| Not during the past month                                                                                                                                      | 0 |
| Less than once a week                                                                                                                                          | 1 |
| Once or twice a week                                                                                                                                           | 2 |
| Three or more times a week                                                                                                                                     | 3 |
| <b>3. Maintenance of sleep: During the past month, how often have you had trouble sleeping because you wake up in the middle of the night or early morning</b> |   |
| Not during the past month                                                                                                                                      | 0 |
| Less than once a week                                                                                                                                          | 1 |
| Once or twice a week                                                                                                                                           | 2 |
| Three or more times a week                                                                                                                                     | 3 |
| <b>4. Quality of sleep: During the past month, how would you rate your sleep quality overall?</b>                                                              |   |
| Very good                                                                                                                                                      | 0 |
| Fairly good                                                                                                                                                    | 1 |
| Fairly bad                                                                                                                                                     | 2 |
| Very bad                                                                                                                                                       | 3 |

**[Reference]**

1. Buysse DJ, Reynolds CF, Charles F, et al (1989). The Pittsburgh sleep quality index: a new instrument for psychiatric practice and research. *Psychiatry Research*, 28 (2), 193–213.
2. Doi Y, Minowa M, Uchiyama M, et al. Psychometric assessment of subjective sleep quality using the Japanese version of the Pittsburgh Sleep Quality Index (PSQI-J) in psychiatric disordered and control subjects. *Psychiatry Res.* 2000 Dec 27;97(2-3):165-72. doi: 10.1016/s0165-1781(00)00232-8.

**Answer: Please tick the number that best applies**

|                    |   |   |   |   |   |   |   |   |                  |
|--------------------|---|---|---|---|---|---|---|---|------------------|
| Very inappropriate |   |   |   |   |   |   |   |   | Very appropriate |
| 1                  | 2 | 3 | 4 | 5 | 6 | 7 | 8 | 9 |                  |

**3) Appropriateness of the scoring methods for b134 Sleep functions linked to Pittsburgh Sleep Quality Index****Ratings**

0 No problem: All items scored 0.

1 Mild problem: Lowest item scores 1

1  
2  
3  
4  
5  
6  
7  
8  
9  
10  
11  
12  
13  
14  
15  
16  
17  
18  
19  
20  
21  
22  
23  
24  
25  
26  
27  
28  
29  
30  
31  
32  
33  
34  
35  
36  
37  
38  
39  
40  
41  
42  
43  
44  
45  
46  
47  
48  
49  
50  
51  
52  
53  
54  
55  
56  
57  
58  
59  
60

2 Moderate problem: Lowest item scores 2

3 Severe problem: Lowest item scores 3

4 Complete problem: Lowest item scores 1 and use of sleeping pills does not improve the problem

**Answer: Please tick the number that best applies**

| Very inappropriate |   |   |   |   |   |   |   |   | Very appropriate |  |
|--------------------|---|---|---|---|---|---|---|---|------------------|--|
| 1                  | 2 | 3 | 4 | 5 | 6 | 7 | 8 | 9 |                  |  |

For peer review only

## **b164 Higher-level cognitive functions**

Specific mental functions especially dependent on the frontal lobes of the brain, including complex goal-directed behaviours such as decision-making, abstract thinking, planning and carrying out plans, mental flexibility, and deciding which behaviours are appropriate under what circumstances; often called executive functions.

*Inclusions: categorization, concept formation, cognitive flexibility*

*Exclusions: Calculation functions (b172), Memory functions (b144), Mental functions of language (b167), Thought functions (b160)*

### **1) Appropriateness of b164 Higher-level cognitive functions.**

#### **Ratings**

0 No problem

1 Mild problem: May include problems with **higher-level cognitive functions** that do not affect the patient's daily activities.

2 Moderate problem: May include a problem with **higher-level cognitive functions** that exceeds 1, but remains a relatively minor problem (<50%).

3 Severe problem: May include a major problem ( $\geq 50\%$ ) in **higher-level cognitive functions**.

4 Complete problem: May include a complete problem with **higher-level cognitive functions**.

**Answer: Please tick the number that best applies**

| Very inappropriate |   |   |   |   |   | Very appropriate |   |   |
|--------------------|---|---|---|---|---|------------------|---|---|
| 1                  | 2 | 3 | 4 | 5 | 6 | 7                | 8 | 9 |

### **2) Appropriateness of existing assessment batteries linked to b164 Higher-level cognitive functions.**

#### **Existing assessment battery linked to b164 Higher-level cognitive functions: Frontal Assessment Battery**

Frontal Assessment Battery

#### **[Reference]**

1. Dubois B, Slachevsky A, Litvan I, et al. The FAB: a Frontal Assessment Battery at bedside. *Neurology*. 2000 Dec 12;55(11):1621-6. doi: 10.1212/wnl.55.11.1621.
2. Nakaaki S, Murata Y, Sato J, et al. Reliability and validity of the Japanese version of the

1  
2  
3  
4  
5  
6 Frontal Assessment Battery in patients with the frontal variant of frontotemporal dementia.  
7 Psychiatry Clin Neurosci. 2007 Feb;61(1):78-83. doi: 10.1111/j.1440-1819.2007.01614.x.  
8  
9

10 **Answer: Please tick the number that best applies**

|                    |   |   |   |   |                  |   |   |   |  |
|--------------------|---|---|---|---|------------------|---|---|---|--|
| Very inappropriate |   |   |   |   | Very appropriate |   |   |   |  |
| 1                  | 2 | 3 | 4 | 5 | 6                | 7 | 8 | 9 |  |

11  
12  
13  
14  
15  
16 **3) Appropriateness of the scoring methods for b164 Higher-level cognitive functions**  
17 **linked to Frontal Assessment Battery**  
18

19  
20  
21 **Ratings**

- 22 0 No problem: FAB Total scores 18-16  
23  
24 1 Mild problem: FAB Total scores 15-14  
25  
26 2 Moderate problem: FAB Total scores 13-9  
27  
28 3 Severe problem: FAB Total scores 8-5  
29  
30 4 Complete problem: FAB Total scores 4-0

31 **Answer: Please tick the number that best applies**

|                    |   |   |   |   |                  |   |   |   |  |
|--------------------|---|---|---|---|------------------|---|---|---|--|
| Very inappropriate |   |   |   |   | Very appropriate |   |   |   |  |
| 1                  | 2 | 3 | 4 | 5 | 6                | 7 | 8 | 9 |  |

**This is followed by questions on b410: Heart function, b415: Blood vessel function and others and a total of 43 ICF categories.**

For peer review only

1  
2  
3  
4  
5  
6  
7  
8  
9  
10  
11  
12  
13  
14  
15  
16  
17  
18  
19  
20  
21  
22  
23  
24  
25  
26  
27  
28  
29  
30  
31  
32  
33  
34  
35  
36  
37  
38  
39  
40  
41  
42  
43  
44  
45  
46  
47  
48  
49  
50  
51  
52  
53  
54  
55  
56  
57  
58  
59  
60

**Supplemental material 2**

Results of the literature review of the ICF linking Rules: correspondence table of 43 ICF categories and linked existing assessment batteries.

| Study                | Darzins SW, et al (2017) [46] | Milman N, et al (2015) [42] | Hoang-Kim A, et al (2013). [43] |       | Cieza A, et al (2005). [44] |       |     |             |              | Prodinge B, et al (2019) [47] |       | Alarcos Cieza (2008) [45] | Bladh S, et al (2013) [41] |        |     |       | Prodinge B, et al (2017) [40] |              |
|----------------------|-------------------------------|-----------------------------|---------------------------------|-------|-----------------------------|-------|-----|-------------|--------------|-------------------------------|-------|---------------------------|----------------------------|--------|-----|-------|-------------------------------|--------------|
| Assessment batteries | FIM                           | SF-36                       | EQ-5D                           | SF-36 | EQ-5D                       | SF-36 | NHP | WHOD AS 2.0 | WHOQ OL-CHEF | WHOD AS 2.0                   | SF-36 | SF-36                     | FES-I                      | FES(S) | ABC | SAFFE | FIM                           | Birthe Index |
| b110                 |                               |                             |                                 |       |                             |       |     |             |              |                               |       |                           |                            |        |     |       |                               |              |
| b114                 |                               |                             |                                 |       |                             |       |     |             |              |                               |       |                           |                            |        |     |       |                               |              |
| b130                 |                               | ✓                           |                                 | ✓     |                             |       | ✓   |             | ✓            |                               |       | ✓                         |                            |        |     |       |                               |              |
| b134                 |                               |                             |                                 |       |                             |       | ✓   |             | ✓            |                               |       |                           |                            |        |     |       |                               |              |
| b164                 |                               |                             |                                 |       |                             |       |     |             |              |                               |       |                           |                            |        |     |       |                               |              |
| b410                 |                               |                             |                                 |       |                             |       |     |             |              |                               |       |                           |                            |        |     |       |                               |              |
| b415                 |                               |                             |                                 |       |                             |       |     |             |              |                               |       |                           |                            |        |     |       |                               |              |
| b420                 |                               |                             |                                 |       |                             |       |     |             |              |                               |       |                           |                            |        |     |       |                               |              |
| b440                 |                               |                             |                                 |       |                             |       |     |             |              |                               |       |                           |                            |        |     |       |                               |              |
| b455                 |                               |                             |                                 |       |                             |       |     |             |              |                               |       |                           |                            |        |     |       |                               |              |
| b460                 |                               |                             |                                 |       |                             |       |     |             |              |                               |       |                           |                            |        |     |       |                               |              |
| b525                 | ✓                             |                             |                                 |       |                             |       |     |             |              |                               |       |                           |                            |        |     |       |                               |              |
| b530                 |                               |                             |                                 |       |                             |       |     |             |              |                               |       |                           |                            |        |     |       |                               |              |
| b540                 |                               |                             |                                 |       |                             |       |     |             |              |                               |       |                           |                            |        |     |       |                               |              |
| b620                 | ✓                             |                             |                                 |       |                             |       |     |             |              |                               |       |                           |                            |        |     |       |                               |              |
| b710                 |                               |                             |                                 |       |                             |       |     |             |              |                               |       |                           |                            |        |     |       |                               |              |
| b730                 |                               |                             |                                 |       |                             |       |     |             |              |                               |       |                           |                            |        |     |       |                               |              |
| s410                 |                               |                             |                                 |       |                             |       |     |             |              |                               |       |                           |                            |        |     |       |                               |              |

|    |      |   |  |   |   |   |   |   |   |   |  |   |   |   |   |   |   |   |
|----|------|---|--|---|---|---|---|---|---|---|--|---|---|---|---|---|---|---|
| 1  | d177 |   |  |   |   |   |   |   |   |   |  |   |   |   |   |   |   |   |
| 2  | d230 |   |  | ✓ | ✓ | ✓ |   | ✓ | ✓ |   |  |   |   |   |   |   |   |   |
| 3  | d310 |   |  |   |   |   |   | ✓ |   |   |  |   |   |   |   |   |   |   |
| 4  | d330 |   |  |   |   |   |   |   |   |   |  |   |   |   |   |   |   |   |
| 5  | d330 |   |  |   |   |   |   |   |   |   |  |   |   |   |   |   |   |   |
| 6  | d420 |   |  | ✓ |   |   |   |   |   | ✓ |  |   |   |   |   |   |   |   |
| 7  | d420 |   |  | ✓ |   |   |   |   |   | ✓ |  |   |   |   |   |   |   |   |
| 8  | d450 | ✓ |  | ✓ | ✓ | ✓ | ✓ | ✓ |   |   |  | ✓ |   | ✓ | ✓ | ✓ | ✓ | ✓ |
| 9  | d450 | ✓ |  | ✓ | ✓ | ✓ | ✓ | ✓ |   |   |  | ✓ |   | ✓ | ✓ | ✓ | ✓ | ✓ |
| 10 | d510 | ✓ |  | ✓ | ✓ | ✓ |   | ✓ |   | ✓ |  |   | ✓ | ✓ |   | ✓ |   | ✓ |
| 11 | d520 | ✓ |  |   |   |   |   |   |   | ✓ |  |   |   |   |   |   |   |   |
| 12 | d520 | ✓ |  |   |   |   |   |   |   | ✓ |  |   |   |   |   |   |   |   |
| 13 | d530 | ✓ |  |   |   |   |   |   |   | ✓ |  |   | ✓ |   |   | ✓ | ✓ |   |
| 14 | d540 | ✓ |  | ✓ | ✓ | ✓ | ✓ | ✓ |   |   |  | ✓ | ✓ |   |   | ✓ | ✓ |   |
| 15 | d540 | ✓ |  | ✓ | ✓ | ✓ | ✓ | ✓ |   |   |  | ✓ | ✓ |   |   | ✓ | ✓ |   |
| 16 | d550 | ✓ |  |   |   |   |   | ✓ |   |   |  |   |   |   |   |   |   | ✓ |
| 17 | d560 | ✓ |  |   |   |   |   |   |   |   |  |   |   |   |   |   |   |   |
| 18 | d560 | ✓ |  |   |   |   |   |   |   |   |  |   |   |   |   |   |   |   |
| 19 | d570 |   |  |   |   |   |   |   |   |   |  |   |   |   |   |   | ✓ |   |
| 20 | d620 |   |  |   |   |   |   |   |   | ✓ |  |   | ✓ | ✓ |   | ✓ |   |   |
| 21 | d620 |   |  |   |   |   |   |   |   | ✓ |  |   | ✓ | ✓ |   | ✓ |   |   |
| 22 | d630 |   |  |   |   |   |   | ✓ |   | ✓ |  |   | ✓ |   |   | ✓ |   |   |
| 23 | d630 |   |  |   |   |   |   | ✓ |   | ✓ |  |   | ✓ |   |   | ✓ |   |   |
| 24 | d640 |   |  | ✓ | ✓ |   |   | ✓ |   |   |  | ✓ | ✓ | ✓ | ✓ |   |   |   |
| 25 | d710 |   |  |   |   |   |   |   |   |   |  |   |   |   |   |   |   |   |
| 26 | d760 |   |  | ✓ | ✓ | ✓ |   |   |   |   |  |   |   |   |   |   |   |   |
| 27 | d760 |   |  | ✓ | ✓ | ✓ |   |   |   |   |  |   |   |   |   |   |   |   |
| 28 | d920 |   |  | ✓ | ✓ | ✓ | ✓ | ✓ | ✓ |   |  | ✓ |   |   |   | ✓ |   |   |
| 29 | d920 |   |  | ✓ | ✓ | ✓ | ✓ | ✓ | ✓ |   |  | ✓ |   |   |   | ✓ |   |   |
| 30 | e310 |   |  |   |   |   |   |   |   |   |  |   |   |   |   |   |   |   |
| 31 | e340 |   |  |   |   |   |   |   |   |   |  |   |   |   |   |   |   |   |
| 32 | e340 |   |  |   |   |   |   |   |   |   |  |   |   |   |   |   |   |   |
| 33 | e355 |   |  |   |   |   |   |   |   |   |  |   |   |   |   |   |   |   |
| 34 | e410 |   |  |   |   |   |   |   |   |   |  |   |   |   |   |   |   |   |
| 35 | e410 |   |  |   |   |   |   |   |   |   |  |   |   |   |   |   |   |   |
| 36 | e575 |   |  |   |   |   |   |   |   |   |  |   |   |   |   |   |   |   |
| 37 | e575 |   |  |   |   |   |   |   |   |   |  |   |   |   |   |   |   |   |
| 38 | e580 |   |  |   |   |   |   |   | ✓ |   |  |   |   |   |   |   |   |   |

Functional Independence Measure (FIM), Short-Form 36 health survey (SF-36), EuroQol 5 dimensions (EQ-5D), the Nottingham Health Profile(NHP), the World Health Organization Disability Assessment Schedule (WHODAS 2.0), the World Health Organization Quality of Life Assessment (WHOQOL-BREF)



1 Falls Efficacy Scale-International (FES-I), the Swedish version of the Falls Efficacy Scale (FES[S]), the Activities-specific Balance Confidence Scale (ABC),  
2 the modified Survey of Activities and Fear of Falling in the Elderly (SAFFE)  
3  
4  
5  
6  
7  
8  
9  
10  
11  
12  
13  
14  
15  
16  
17  
18  
19  
20  
21  
22  
23  
24  
25  
26  
27  
28  
29  
30  
31  
32  
33  
34  
35  
36  
37  
38  
39  
40  
41  
42  
43  
44  
45  
46

For peer review only

### Supplemental material 3

Results of the three questions of the 43 ICF categories in the first Delphi round

| ICF categories                                                                                                       |    |     | Question Items                                                      |                                                                                                  |                                                                                   |                                        |                                                                                                           |                                        |     |    |
|----------------------------------------------------------------------------------------------------------------------|----|-----|---------------------------------------------------------------------|--------------------------------------------------------------------------------------------------|-----------------------------------------------------------------------------------|----------------------------------------|-----------------------------------------------------------------------------------------------------------|----------------------------------------|-----|----|
|                                                                                                                      |    |     | 1) Appropriateness of ICF 43 category scoring descriptions          |                                                                                                  | 2) Appropriateness of existing assessment batteries linked to each ICF categories |                                        | 3) Appropriateness of the scoring methods for each ICF categories linked to existing assessment batteries |                                        |     |    |
| Existing assessment batteries linked to ICF categories                                                               |    |     | median score (/9)                                                   | Number of outside median tertile (/21)                                                           | median score (/9)                                                                 | Number of outside median tertile (/21) | median score (/9)                                                                                         | Number of outside median tertile (/21) |     |    |
| 10<br>11<br>12<br>13<br>14<br>15<br>16<br>17<br>18<br>19<br>20<br>21<br>22<br>23<br>24<br>25<br>26<br>27<br>28<br>29 | 30 | 110 | Consciousness function                                              | Japan Coma Scale                                                                                 | 7                                                                                 | 7                                      | 8                                                                                                         | 1                                      | 7   | 4  |
| 31<br>32                                                                                                             | 31 | 114 | Orientation function                                                | Mimi-Mental State Examination                                                                    | 8                                                                                 | 6                                      | 8                                                                                                         | 2                                      | 8   | 4  |
| 33                                                                                                                   | 33 | 130 | Energy and drive function                                           | Vitality Index                                                                                   | 7                                                                                 | 7                                      | 8                                                                                                         | 2                                      | 8   | 2  |
| 34<br>35                                                                                                             | 34 | 134 | Sleep function                                                      | -                                                                                                | 7                                                                                 | 9                                      | -                                                                                                         | -                                      | -   | -  |
| 36                                                                                                                   | 36 | 164 | Higher-level cognitive functions                                    | Frontal Assessment Battery                                                                       | 7                                                                                 | 6                                      | 7                                                                                                         | 7                                      | 7.5 | 4  |
| 37<br>38<br>39                                                                                                       | 38 | 410 | Heart function                                                      | Echocardiography; left ventricular function, Electrocardiogram                                   | 7                                                                                 | 4                                      | 7                                                                                                         | 8                                      | 7   | 11 |
| 40<br>41                                                                                                             | 40 | 415 | Blood vessel function                                               | Fontaine classification                                                                          | 7                                                                                 | 5                                      | 8                                                                                                         | 2                                      | 8   | 4  |
| 42                                                                                                                   | 42 | 420 | Blood pressure function                                             | Blood pressure                                                                                   | 7                                                                                 | 6                                      | 7.5                                                                                                       | 4                                      | 8   | 4  |
| 43<br>44<br>45<br>46<br>47                                                                                           | 44 | 440 | Respiration function                                                | Arterial Blood Gas Analysis, fraction of inspiratory oxygen, SpO <sub>2</sub> , Respiration Rate | 8                                                                                 | 4                                      | 8                                                                                                         | 4                                      | 7   | 5  |
| 48<br>49                                                                                                             | 48 | 455 | Exercise tolerance function                                         | Specific Activity Scale                                                                          | 8                                                                                 | 3                                      | 7.5                                                                                                       | 1                                      | 7   | 3  |
| 50<br>51<br>52<br>53                                                                                                 | 50 | 460 | Sensations associated with cardiovascular and respiratory functions | NYHA classification                                                                              | 8                                                                                 | 4                                      | 8                                                                                                         | 3                                      | 8   | 2  |
| 54<br>55                                                                                                             | 54 | 525 | Defaecation function                                                | -                                                                                                | 7                                                                                 | 6                                      | 7                                                                                                         | 4                                      | -   | -  |
| 56                                                                                                                   | 56 | 530 | Weight maintenance functions                                        | Body Mass Index                                                                                  | 7                                                                                 | 6                                      | 8                                                                                                         | 3                                      | 8   | 4  |
| 57<br>58<br>59                                                                                                       | 57 | 545 | Water, mineral and electrolyte balance functions                    | Blood test: Na, K                                                                                | 7.5                                                                               | 5                                      | 8                                                                                                         | 4                                      | 7.5 | 6  |

1  
2  
3  
4  
5  
6  
7  
8  
9  
10  
11  
12  
13  
14  
15  
16  
17  
18  
19  
20  
21  
22  
23  
24  
25  
26  
27  
28  
29  
30  
31  
32  
33  
34  
35  
36  
37  
38  
39  
40  
41  
42  
43  
44  
45  
46  
47  
48  
49  
50  
51  
52  
53  
54  
55  
56  
57  
58  
59  
60

|               |                                                 |                                                                       |     |   |     |   |     |   |
|---------------|-------------------------------------------------|-----------------------------------------------------------------------|-----|---|-----|---|-----|---|
| b620          | Urination function                              | -                                                                     | 7   | 5 | 8   | 2 | -   | - |
| b710          | Mobility of joint function                      | Range Of Motion                                                       | 8   | 4 | 7   | 4 | 7   | 5 |
| b730          | Muscle power function                           | Manual Muscle Test or five-times sit-to-stand                         | 8   | 4 | 7.5 | 5 | 7.5 | 6 |
| s410          | Structure of the cardiovascular system          | Echocardiography; Severity of valve function<br>Chest radiograph; CTR | 7   | 5 | 7   | 9 | 7   | 9 |
| d177          | Making decisions                                | -                                                                     | 8   | 3 | -   | - | -   | - |
| d230          | Carrying out daily routine                      | -                                                                     | 8   | 2 | -   | - | -   | - |
| d310          | Communicating with-receiving-spoken messages    | FIM; Comprehension                                                    | 7.5 | 5 | 8   | 4 | 8   | 4 |
| d330          | Speaking                                        | FIM; Expression                                                       | 8   | 5 | 7   | 8 | 7   | 7 |
| d420          | Transferring oneself                            | FIM; Transfers                                                        | 8   | 3 | 8   | 0 | 8   | 2 |
| d450          | Walking                                         | FIM; Walk<br>5-m walk test                                            | 8   | 4 | 7   | 5 | 7   | 5 |
| d510          | Washing oneself                                 | FIM; Bathing                                                          | 8   | 3 | 8   | 4 | 7   | 4 |
| d520          | Caring for body parts                           | FIM; Grooming                                                         | 8   | 4 | 7.5 | 2 | 7   | 4 |
| d530          | Toileting                                       | FIM; Toileting                                                        | 7   | 4 | 8   | 1 | 8   | 4 |
| d540          | Dressing                                        | FIM; Dressing                                                         | 8   | 4 | 7.5 | 2 | 7   | 4 |
| d550/<br>d560 | Eating/ Drinking                                | FIM; Eating                                                           | 8   | 4 | 8   | 3 | 8   | 5 |
| d570          | Looking after one's health                      | -                                                                     | 7.5 | 3 | -   | - | -   | - |
| d620          | Acquisition of goods and services               | Instrumental Activities of Daily Living scale; Shopping               | 7.5 | 4 | 8   | 4 | 7   | 5 |
| d630          | Preparing meals                                 | Instrumental Activities of Daily Living scale; Food preparation       | 7   | 7 | 7.5 | 3 | 7   | 6 |
| d640          | Doing housework                                 | Instrumental Activities of Daily Living scale; Housekeeping           | 7   | 5 | 7   | 2 | 7   | 4 |
| d710          | Basic interpersonal interactions                | -                                                                     | 8   | 2 | -   | - | -   | - |
| d760          | Family relationships                            | -                                                                     | 8   | 3 | -   | - | -   | - |
| d920          | Recreation and leisure                          | -                                                                     | 8   | 4 | -   | - | -   | - |
| e310          | Immediate family                                | -                                                                     | 8   | 4 | -   | - | -   | - |
| e340          | Personal care providers and personal assistants | -                                                                     | 7   | 4 | -   | - | -   | - |
| e355          | Health professionals                            | -                                                                     | 8   | 4 | -   | - | -   | - |

1  
2  
3  
4  
5  
6  
7  
8  
9  
10  
11  
12  
13  
14  
15  
16  
17  
18  
19  
20  
21  
22  
23  
24  
25  
26  
27  
28  
29  
30  
31  
32  
33  
34  
35  
36  
37  
38  
39  
40  
41  
42  
43  
44  
45  
46  
47  
48  
49  
50  
51  
52  
53  
54  
55  
56  
57  
58  
59  
60

|      |                                                        |   |     |   |   |   |   |   |
|------|--------------------------------------------------------|---|-----|---|---|---|---|---|
| e410 | Individual attitudes of immediate family members       | - | 7.5 | 5 | - | - | - | - |
| e575 | General social support services, systems, and policies | - | 7.5 | 5 | - | - | - | - |
| e580 | Health services, systems, and policies                 | - | 7.5 | 3 | - | - | - | - |

SpO<sub>2</sub>, oxygen saturation; NYHA, New York Heart Association; CTR, cardiothoracic ratio;

FIM, Functional Independence Measure.

Bolded text indicates items of disagreement.
