# Supplementary material for: Development and appropriateness of a scoring method for International Classification of Functioning, Disabilities, and Health assessment in older patients with heart failure: a Delphi survey of expert panel in Japan
Source: PubMed Central journal article supplement — BMJ Open. 2022 Sep 17;12(9):e060609. doi: 10.1136/bmjopen-2021-060609 (PMC9486326; doi:10.1136/bmjopen-2021-060609), 2022-09-17
Supplement: bmjopen-2021-060609supp002.pdf [file bmjopen-2021-060609supp002.pdf]

## Supplemental material 2

Results of the literature review of the ICF linking Rules: correspondence table of 43 ICF categories and linked existing assessment batteries.

| Study                   | Darzins<br>SW, et<br>al<br>(2017)<br>[46] | Milman<br>N, et al<br>(2015)<br>[42] | Hoang-Kim A, et al<br>(2013).<br>[43] |       | Cieza A, et al<br>(2005). [44] |       |     |                |                     | Prodinger B, et al<br>(2019)<br>[47] |       | Alarcos<br>Cieza<br>(2008)<br>[45] | Bladh S, et al<br>(2013)<br>[41] |        |     |       | Prodinger B, et al<br>(2017)<br>[40] |                      |
|-------------------------|-------------------------------------------|--------------------------------------|---------------------------------------|-------|--------------------------------|-------|-----|----------------|---------------------|--------------------------------------|-------|------------------------------------|----------------------------------|--------|-----|-------|--------------------------------------|----------------------|
| Assessment<br>batteries | FIM                                       | SF-36                                | EQ-5D                                 | SF-36 | EQ-5D                          | SF-36 | NHP | WHOD<br>AS 2.0 | WHOQ<br>OL-<br>CHEF | WHOD<br>AS 2.0                       | SF-36 | SF-36                              | FES-I                            | FES(S) | ABC | SAFFE | FIM                                  | Birthe<br>l<br>Index |
| b110                    |                                           |                                      |                                       |       |                                |       |     |                |                     |                                      |       |                                    |                                  |        |     |       |                                      |                      |
| b114                    |                                           |                                      |                                       |       |                                |       |     |                |                     |                                      |       |                                    |                                  |        |     |       |                                      |                      |
| b130                    |                                           | ✓                                    |                                       | ✓     |                                |       | ✓   |                | ✓                   |                                      |       | ✓                                  |                                  |        |     |       |                                      |                      |
| b134                    |                                           |                                      |                                       |       |                                |       | ✓   |                | ✓                   |                                      |       |                                    |                                  |        |     |       |                                      |                      |
| b164                    |                                           |                                      |                                       |       |                                |       |     |                |                     |                                      |       |                                    |                                  |        |     |       |                                      |                      |
| b410                    |                                           |                                      |                                       |       |                                |       |     |                |                     |                                      |       |                                    |                                  |        |     |       |                                      |                      |
| b415                    |                                           |                                      |                                       |       |                                |       |     |                |                     |                                      |       |                                    |                                  |        |     |       |                                      |                      |
| b420                    |                                           |                                      |                                       |       |                                |       |     |                |                     |                                      |       |                                    |                                  |        |     |       |                                      |                      |
| b440                    |                                           |                                      |                                       |       |                                |       |     |                |                     |                                      |       |                                    |                                  |        |     |       |                                      |                      |
| b455                    |                                           |                                      |                                       |       |                                |       |     |                |                     |                                      |       |                                    |                                  |        |     |       |                                      |                      |
| b460                    |                                           |                                      |                                       |       |                                |       |     |                |                     |                                      |       |                                    |                                  |        |     |       |                                      |                      |
| b525                    | ✓                                         |                                      |                                       |       |                                |       |     |                |                     |                                      |       |                                    |                                  |        |     |       |                                      |                      |
| b530                    |                                           |                                      |                                       |       |                                |       |     |                |                     |                                      |       |                                    |                                  |        |     |       |                                      |                      |
| b540                    |                                           |                                      |                                       |       |                                |       |     |                |                     |                                      |       |                                    |                                  |        |     |       |                                      |                      |
| b620                    | ✓                                         |                                      |                                       |       |                                |       |     |                |                     |                                      |       |                                    |                                  |        |     |       |                                      |                      |
| b710                    |                                           |                                      |                                       |       |                                |       |     |                |                     |                                      |       |                                    |                                  |        |     |       |                                      |                      |
| b730                    |                                           |                                      |                                       |       |                                |       |     |                |                     |                                      |       |                                    |                                  |        |     |       |                                      |                      |
| s410                    |                                           |                                      |                                       |       |                                |       |     |                |                     |                                      |       |                                    |                                  |        |     |       |                                      |                      |

|      |   |  |   |   |   |   |   |   |   |   |  |   |   |   |   |   |   |   |
|------|---|--|---|---|---|---|---|---|---|---|--|---|---|---|---|---|---|---|
| d177 |   |  |   |   |   |   |   |   |   |   |  |   |   |   |   |   |   |   |
| d230 |   |  |   | ✓ | ✓ | ✓ |   | ✓ | ✓ |   |  |   |   |   |   |   |   |   |
| d310 |   |  |   |   |   |   |   | ✓ |   |   |  |   |   |   |   |   |   |   |
| d330 |   |  |   |   |   |   |   |   |   |   |  |   |   |   |   |   |   |   |
| d420 |   |  |   | ✓ |   |   |   |   |   | ✓ |  |   |   |   |   |   |   |   |
| d450 | ✓ |  | ✓ | ✓ | ✓ | ✓ | ✓ |   |   |   |  | ✓ |   | ✓ | ✓ | ✓ | ✓ | ✓ |
| d510 | ✓ |  | ✓ | ✓ | ✓ | ✓ |   | ✓ |   | ✓ |  | ✓ | ✓ |   | ✓ |   | ✓ | ✓ |
| d520 | ✓ |  |   |   |   |   |   |   |   | ✓ |  |   |   |   |   |   |   |   |
| d530 | ✓ |  |   |   |   |   |   |   |   | ✓ |  |   | ✓ |   |   | ✓ | ✓ |   |
| d540 | ✓ |  | ✓ | ✓ | ✓ | ✓ | ✓ | ✓ |   |   |  | ✓ | ✓ |   |   | ✓ | ✓ |   |
| d550 | ✓ |  |   |   |   |   |   | ✓ |   |   |  |   |   |   |   |   |   | ✓ |
| d560 | ✓ |  |   |   |   |   |   |   |   |   |  |   |   |   |   |   |   |   |
| d570 |   |  |   |   |   |   |   |   |   |   |  |   |   |   |   |   | ✓ |   |
| d620 |   |  |   |   |   |   |   |   |   | ✓ |  |   | ✓ | ✓ |   | ✓ |   |   |
| d630 |   |  |   |   |   |   | ✓ |   |   | ✓ |  |   | ✓ |   |   | ✓ |   |   |
| d640 |   |  | ✓ | ✓ |   |   |   | ✓ |   |   |  | ✓ | ✓ | ✓ | ✓ |   |   |   |
| d710 |   |  |   |   |   |   |   |   |   |   |  |   |   |   |   |   |   |   |
| d760 |   |  | ✓ | ✓ | ✓ |   |   |   |   |   |  |   |   |   |   |   |   |   |
| d920 |   |  | ✓ | ✓ | ✓ | ✓ | ✓ | ✓ | ✓ |   |  |   | ✓ |   |   | ✓ |   |   |
| e310 |   |  |   |   |   |   |   |   |   |   |  |   |   |   |   |   |   |   |
| e340 |   |  |   |   |   |   |   |   |   |   |  |   |   |   |   |   |   |   |
| e355 |   |  |   |   |   |   |   |   |   |   |  |   |   |   |   |   |   |   |
| e410 |   |  |   |   |   |   |   |   |   |   |  |   |   |   |   |   |   |   |
| e575 |   |  |   |   |   |   |   |   |   |   |  |   |   |   |   |   |   |   |
| e580 |   |  |   |   |   |   |   |   | ✓ |   |  |   |   |   |   |   |   |   |

Functional Independence Measure (FIM), Short-Form 36 health survey (SF-36), EuroQol 5 dimensions (EQ-5D), the Nottingham Health Profile(NHP), the World Health Organization Disability Assessment Schedule (WHODAS 2.0), the World Health Organization Quality of Life Assessment (WHOQOL-BREF)

Falls Efficacy Scale-International (FES-I), the Swedish version of the Falls Efficacy Scale (FES[S]), the Activities-specific Balance Confidence Scale (ABC), the modified Survey of Activities and Fear of Falling in the Elderly (SAFFE)
