# Supplementary material for: Development and appropriateness of a scoring method for International Classification of Functioning, Disabilities, and Health assessment in older patients with heart failure: a Delphi survey of expert panel in Japan
Source: PubMed Central journal article supplement — BMJ Open. 2022 Sep 17;12(9):e060609. doi: 10.1136/bmjopen-2021-060609 (PMC9486326; doi:10.1136/bmjopen-2021-060609), 2022-09-17
Supplement: bmjopen-2021-060609supp003.pdf [file bmjopen-2021-060609supp003.pdf]

**Supplemental material 3**

Results of the three questions of the 43 ICF categories in the first Delphi round

| ICF categories |                                                                           | Existing assessment batteries<br>linked to ICF categories                                              | Question Items                                                   |                                                 |                                                                                            |                                                    |                                                                                                                          |                                                       |
|----------------|---------------------------------------------------------------------------|--------------------------------------------------------------------------------------------------------|------------------------------------------------------------------|-------------------------------------------------|--------------------------------------------------------------------------------------------|----------------------------------------------------|--------------------------------------------------------------------------------------------------------------------------|-------------------------------------------------------|
|                |                                                                           |                                                                                                        | 1) Appropriateness of<br>ICF 43 category scoring<br>descriptions |                                                 | 2) Appropriateness of<br>existing assessment<br>batteries linked to<br>each ICF categories |                                                    | 3) Appropriateness of<br>the scoring methods<br>for each ICF<br>categories linked to<br>existing assessment<br>batteries |                                                       |
|                |                                                                           |                                                                                                        | median<br>score (/9)                                             | Number of<br>outside<br>median<br>tertile (/21) | median<br>score (/9)                                                                       | Number<br>of outside<br>median<br>tertile<br>(/21) | median<br>score (/9)                                                                                                     | Number<br>of<br>outside<br>median<br>tertile<br>(/21) |
| b110           | Consciousness function                                                    | Japan Coma Scale                                                                                       | 7                                                                | 7                                               | 8                                                                                          | 1                                                  | 7                                                                                                                        | 4                                                     |
| b114           | Orientation function                                                      | Mimi-Mental State Examination                                                                          | 8                                                                | 6                                               | 8                                                                                          | 2                                                  | 8                                                                                                                        | 4                                                     |
| b130           | Energy and drive function                                                 | Vitality Index                                                                                         | 7                                                                | 7                                               | 8                                                                                          | 2                                                  | 8                                                                                                                        | 2                                                     |
| b134           | Sleep function                                                            | -                                                                                                      | 7                                                                | 9                                               | -                                                                                          | -                                                  | -                                                                                                                        | -                                                     |
| b164           | Higher-level cognitive functions                                          | Frontal Assessment Battery                                                                             | 7                                                                | 6                                               | 7                                                                                          | 7                                                  | 7.5                                                                                                                      | 4                                                     |
| b410           | Heart function                                                            | Echocardiography; left ventricular<br>function, Electrocardiogram                                      | 7                                                                | 4                                               | 7                                                                                          | 8                                                  | 7                                                                                                                        | 11                                                    |
| b415           | Blood vessel function                                                     | Fontaine classification                                                                                | 7                                                                | 5                                               | 8                                                                                          | 2                                                  | 8                                                                                                                        | 4                                                     |
| b420           | Blood pressure function                                                   | Blood pressure                                                                                         | 7                                                                | 6                                               | 7.5                                                                                        | 4                                                  | 8                                                                                                                        | 4                                                     |
| b440           | Respiration function                                                      | Arterial Blood Gas Analysis,<br>fraction of inspiratory oxygen,<br>SpO <sub>2</sub> , Respiration Rate | 8                                                                | 4                                               | 8                                                                                          | 4                                                  | 7                                                                                                                        | 5                                                     |
| b455           | Exercise tolerance function                                               | Specific Activity Scale                                                                                | 8                                                                | 3                                               | 7.5                                                                                        | 1                                                  | 7                                                                                                                        | 3                                                     |
| b460           | Sensations associated with<br>cardiovascular and respiratory<br>functions | NYHA classification                                                                                    | 8                                                                | 4                                               | 8                                                                                          | 3                                                  | 8                                                                                                                        | 2                                                     |
| b525           | Defaecation function                                                      | -                                                                                                      | 7                                                                | 6                                               | 7                                                                                          | 4                                                  | -                                                                                                                        | -                                                     |
| b530           | Weight maintenance functions                                              | Body Mass Index                                                                                        | 7                                                                | 6                                               | 8                                                                                          | 3                                                  | 8                                                                                                                        | 4                                                     |
| b545           | Water, mineral and electrolyte<br>balance functions                       | Blood test: Na, K                                                                                      | 7.5                                                              | 5                                               | 8                                                                                          | 4                                                  | 7.5                                                                                                                      | 6                                                     |

|               |                                                 |                                                                       |     |   |     |   |     |   |
|---------------|-------------------------------------------------|-----------------------------------------------------------------------|-----|---|-----|---|-----|---|
| b620          | Urination function                              | -                                                                     | 7   | 5 | 8   | 2 | -   | - |
| b710          | Mobility of joint function                      | Range Of Motion                                                       | 8   | 4 | 7   | 4 | 7   | 5 |
| b730          | Muscle power function                           | Manual Muscle Test or five-times sit-to-stand                         | 8   | 4 | 7.5 | 5 | 7.5 | 6 |
| s410          | Structure of the cardiovascular system          | Echocardiography; Severity of valve function<br>Chest radiograph; CTR | 7   | 5 | 7   | 9 | 7   | 9 |
| d177          | Making decisions                                | -                                                                     | 8   | 3 | -   | - | -   | - |
| d230          | Carrying out daily routine                      | -                                                                     | 8   | 2 | -   | - | -   | - |
| d310          | Communicating with-receiving-spoken messages    | FIM; Comprehension                                                    | 7.5 | 5 | 8   | 4 | 8   | 4 |
| d330          | Speaking                                        | FIM; Expression                                                       | 8   | 5 | 7   | 8 | 7   | 7 |
| d420          | Transferring oneself                            | FIM; Transfers                                                        | 8   | 3 | 8   | 0 | 8   | 2 |
| d450          | Walking                                         | FIM; Walk<br>5-m walk test                                            | 8   | 4 | 7   | 5 | 7   | 5 |
| d510          | Washing oneself                                 | FIM; Bathing                                                          | 8   | 3 | 8   | 4 | 7   | 4 |
| d520          | Caring for body parts                           | FIM; Grooming                                                         | 8   | 4 | 7.5 | 2 | 7   | 4 |
| d530          | Toileting                                       | FIM; Toileting                                                        | 7   | 4 | 8   | 1 | 8   | 4 |
| d540          | Dressing                                        | FIM; Dressing                                                         | 8   | 4 | 7.5 | 2 | 7   | 4 |
| d550/<br>d560 | Eating/ Drinking                                | FIM; Eating                                                           | 8   | 4 | 8   | 3 | 8   | 5 |
| d570          | Looking after one's health                      | -                                                                     | 7.5 | 3 | -   | - | -   | - |
| d620          | Acquisition of goods and services               | Instrumental Activities of Daily Living scale; Shopping               | 7.5 | 4 | 8   | 4 | 7   | 5 |
| d630          | Preparing meals                                 | Instrumental Activities of Daily Living scale; Food preparation       | 7   | 7 | 7.5 | 3 | 7   | 6 |
| d640          | Doing housework                                 | Instrumental Activities of Daily Living scale; Housekeeping           | 7   | 5 | 7   | 2 | 7   | 4 |
| d710          | Basic interpersonal interactions                | -                                                                     | 8   | 2 | -   | - | -   | - |
| d760          | Family relationships                            | -                                                                     | 8   | 3 | -   | - | -   | - |
| d920          | Recreation and leisure                          | -                                                                     | 8   | 4 | -   | - | -   | - |
| e310          | Immediate family                                | -                                                                     | 8   | 4 | -   | - | -   | - |
| e340          | Personal care providers and personal assistants | -                                                                     | 7   | 4 | -   | - | -   | - |
| e355          | Health professionals                            | -                                                                     | 8   | 4 | -   | - | -   | - |

|      |                                                        |   |     |   |   |   |   |   |
|------|--------------------------------------------------------|---|-----|---|---|---|---|---|
| e410 | Individual attitudes of immediate family members       | - | 7.5 | 5 | - | - | - | - |
| e575 | General social support services, systems, and policies | - | 7.5 | 5 | - | - | - | - |
| e580 | Health services, systems, and policies                 | - | 7.5 | 3 | - | - | - | - |

SpO<sub>2</sub>, oxygen saturation; NYHA, New York Heart Association; CTR, cardiothoracic ratio;

FIM, Functional Independence Measure.

Bolded text indicates items of disagreement.
